# Supplementary material for: DeepGRN: prediction of transcription factor binding site across cell-types using attention-based deep neural networks
Source: PubMed Central journal article supplement (PMC7852092; doi:10.1186/s12859-020-03952-1), 2021-02-01
Supplement: 12859_2020_3952_MOESM1_ESM.pdf [file 12859_2020_3952_MOESM1_ESM.pdf]

**Figure S1 – The training, hyperparameter tuning, and testing procedure used throughout the Challenge dataset.**

The models are trained on the data split described in the methods section. If the leaderboard data is available for a TF, then an additional model selection is performed. The final performance evaluation in this study is performed in the dataset for final ranking determination in the challenge. The models are first trained without epigenomic/conservation scores and external datasets. After training, additional models using epigenomic or conservation score trained using the same configuration as the final model of each TF on all training data. Thus, for each TF there are 6 models in total: pair, single, pair+epigenomic, single+epigenomic, pair+conservation, single+conservation. The results are the combination of two basic models and additional models with auPRC in validation data higher than either of the base models while the downstream analysis are based on two base models.

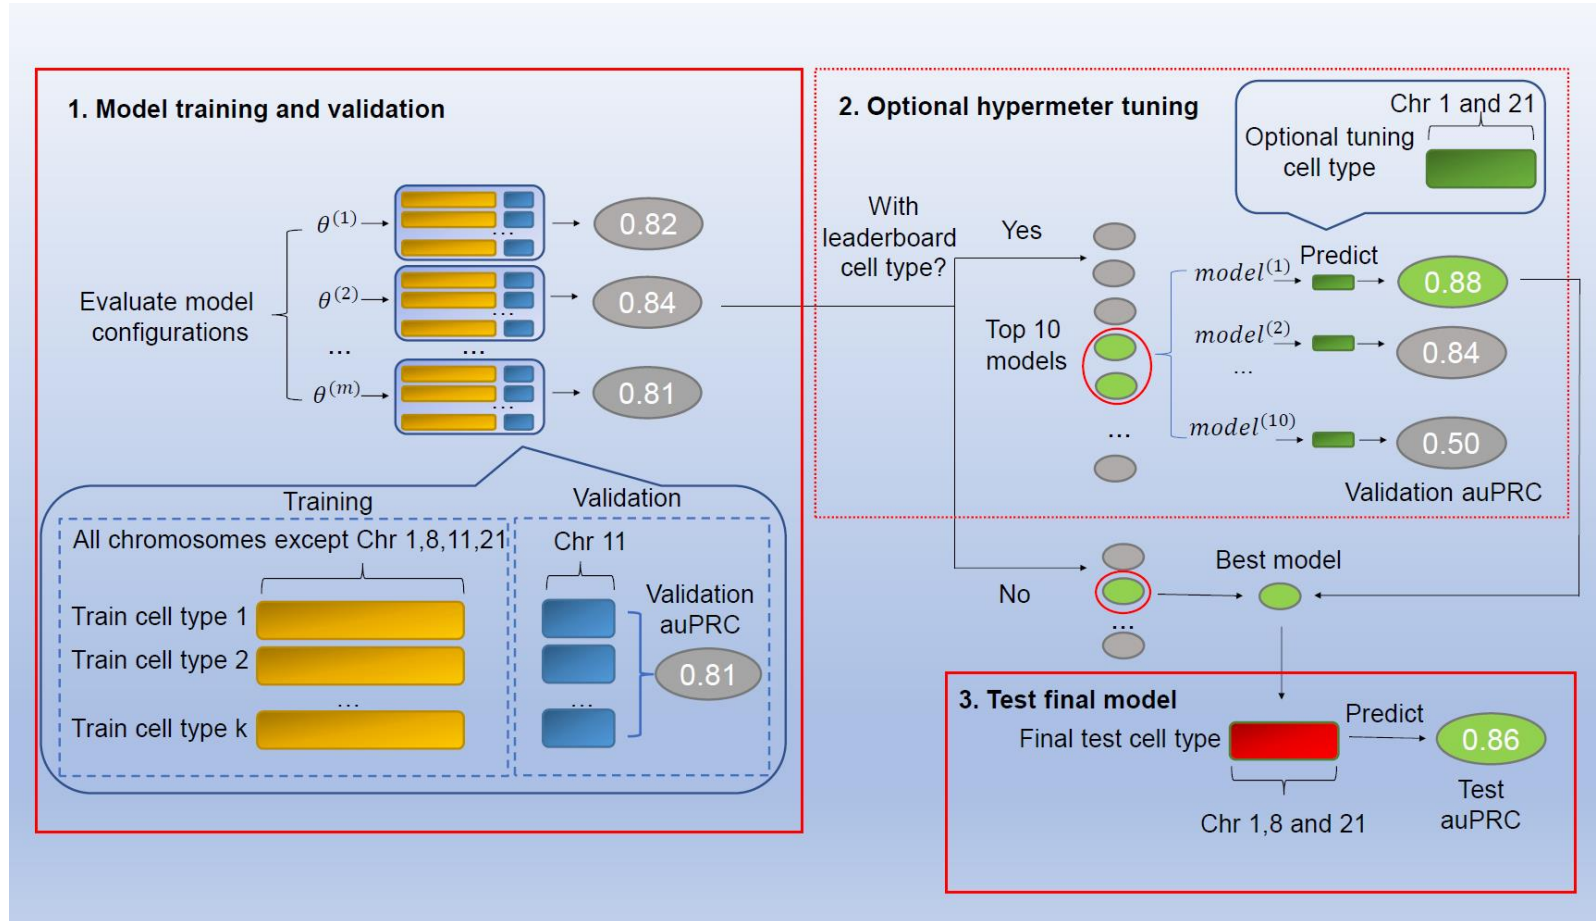

**Figure S2 – Performance of DeepGRN with different selections of input ranges.**

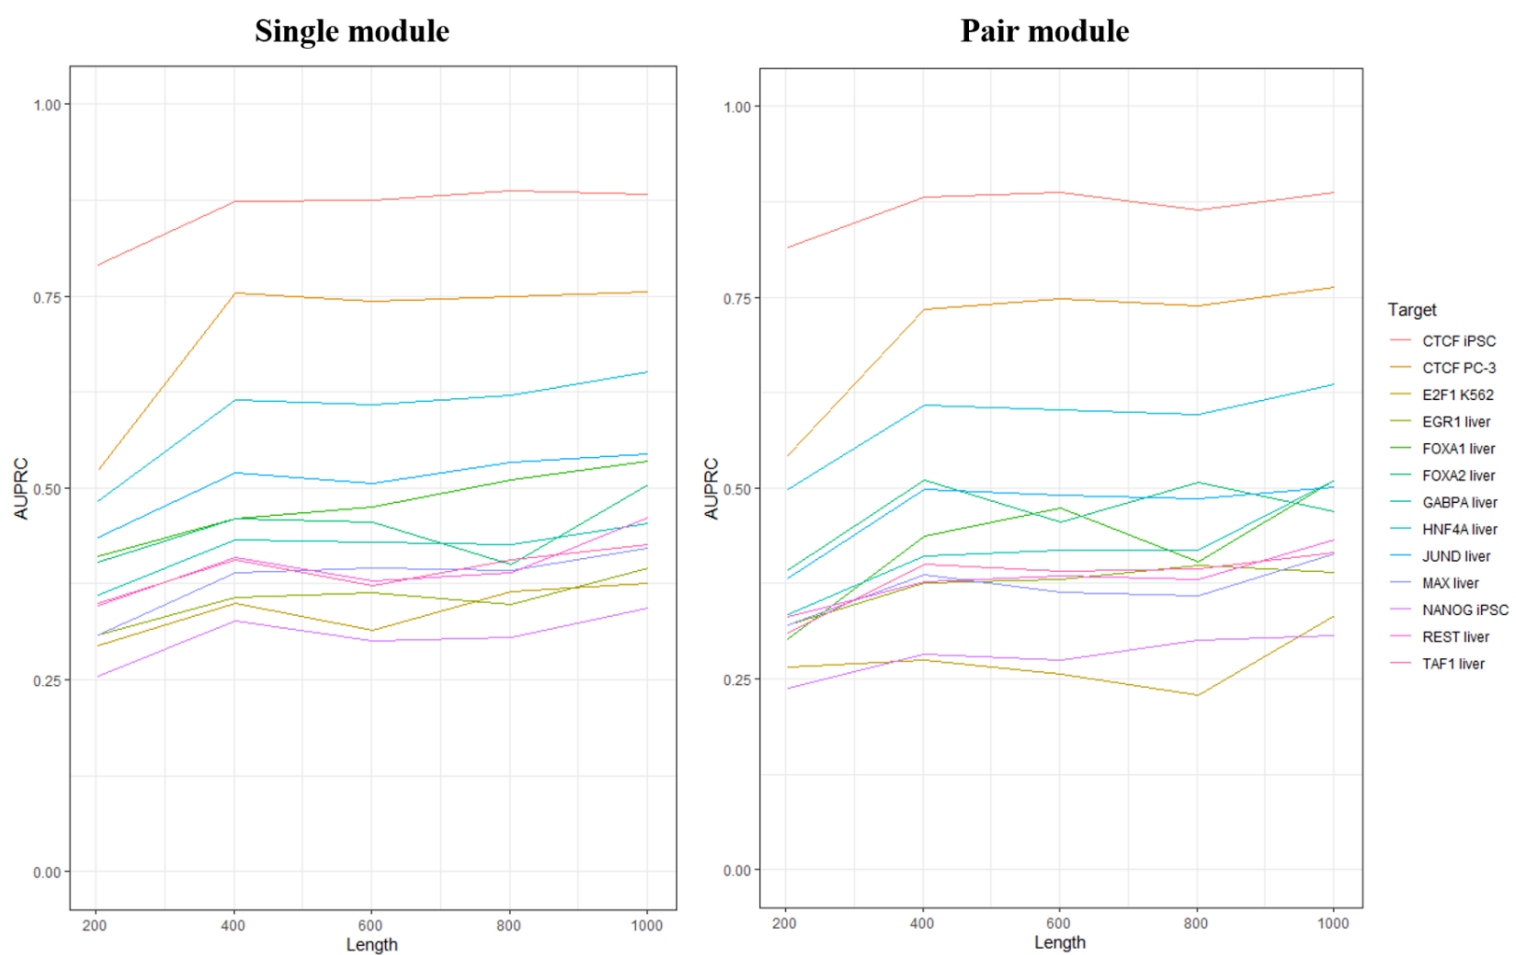

**Figure S3 – Comparisons of known motifs and matching motifs learned by the single attention module in CTCF and FOXA1.**

- (a) Sequence logo built from subsequences detected in CTCF/induced pluripotent cell prediction (left) and motif MA0139.1/ CTCF (right).
- (b) The attention scores of the samples selected from CTCF/induced pluripotent cell prediction with hits in FIMO.
- (c) The relative positions of the detected motifs in the same region of (b).
- (d) The normalized DNase-Seq scores in the same region of (b).

- (e) Sequence logo built from subsequences detected in FOXA1/liver cell prediction (left) and motif MA0148.4/ FOXA1 (right).
- (f) The attention scores of the samples selected from FOXA1/liver cell prediction with hits in FIMO.
- (g) The relative positions of the detected motifs in the same region of (f).
- (h) The normalized DNase-Seq scores in the same region of (f).

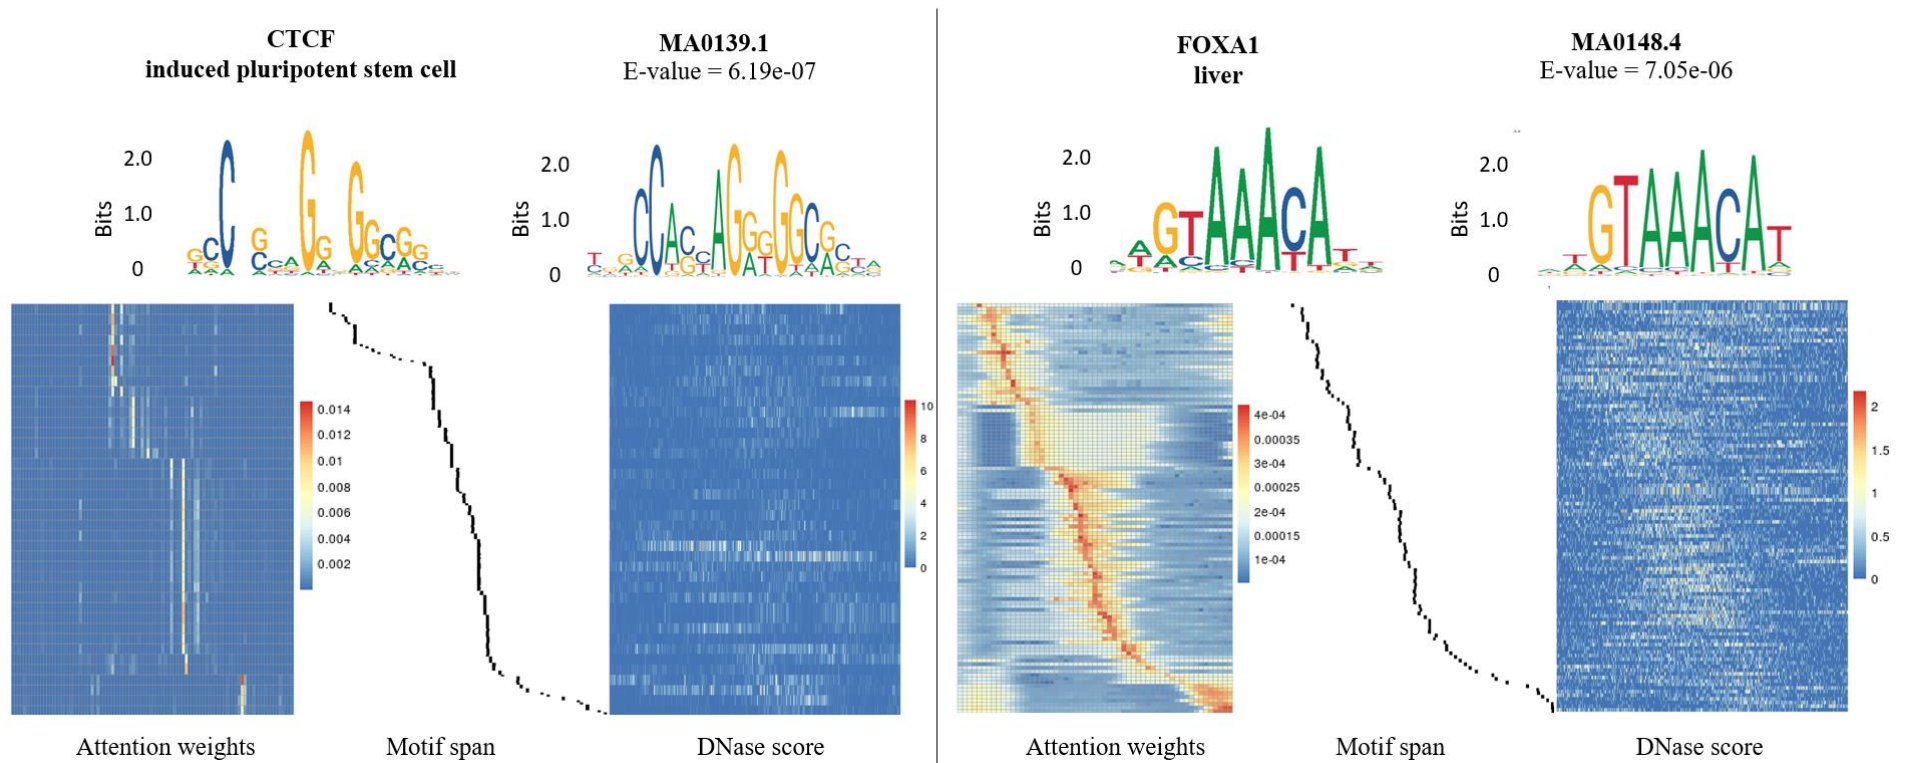

**Table S1 – Cell-types selected for training, validation, and evaluation.**

| TF    | Cell Types                                                          |                       |                                     |
|-------|---------------------------------------------------------------------|-----------------------|-------------------------------------|
|       | Training                                                            | Optional Model Tuning | Evaluation                          |
| CTCF  | A549, H1-hESC, HeLa-S3, HepG2, IMR90, K562, MCF-7, GM23338*, HL-60* | GM12878               | PC-3, induced pluripotent stem cell |
| E2F1  | GM12878, HeLa-S3                                                    |                       | K562                                |
| EGR1  | GM12878, H1-hESC, HCT116, MCF-7                                     | K562                  | liver                               |
| FOXA1 | HepG2                                                               | MCF-7                 | liver                               |
| FOXA2 | HepG2                                                               |                       | liver                               |
| GABPA | GM12878, H1-hESC, HeLa-S3, HepG2, MCF-7, HL-60*                     | K562                  | liver                               |
| HNF4A | HepG2                                                               |                       | liver                               |
| JUND  | HCT116, HeLa-S3, HepG2, K562, MCF-7                                 | H1-hESC               | liver                               |
| MAX   | A549, GM12878, H1-hESC, HCT116, HeLa-S3, HepG2, K562, NB4*          | MCF-7                 | liver                               |
| NANOG | H1-hESC, GM23338*                                                   |                       | induced pluripotent stem cell       |
| REST  | H1-hESC, HeLa-S3, HepG2, MCF-7, Panc1                               | K562                  | liver                               |
| TAF1  | GM12878, H1-hESC, HeLa-S3, K562, GM12891*                           | HepG2                 | liver                               |

\*: External training datasets derived from the Encode Project and Roadmap Epigenomics.

**Table S2 – Hyperparameters selection for model training.** Due to the limitation of computing capacity 50 sets of the combination of these hyperparameters are sampled without replacement for evaluating the configurations. The single and pairwise module always share the same configuration.

| Learning rate                        | Convolution layers |                 |           |              | LSTM layers |           |              | Attention layer          |                  |                     | Dense Layers |           |              |              |
|--------------------------------------|--------------------|-----------------|-----------|--------------|-------------|-----------|--------------|--------------------------|------------------|---------------------|--------------|-----------|--------------|--------------|
|                                      | Layers             | Kernel Size     | Dimension | Dropout rate | Layers      | Dimension | Dropout rate | Position                 | $f_{att}$        | Dimension reduction | Layers       | Dimension | Dropout rate | Merge        |
| 0.01,<br>0.001,<br>0.0005,<br>0.0001 | 0,1,2              | 15,20,<br>30,34 | 64,128    | 0.1,0.5      | 1,2         | 32,64     | 0,0.1,0.5    | Before/<br>after<br>LSTM | MLP,<br>$F(x)=x$ |                     | 2,3,4        | 64,128    | 0.1,0.5      | Max,<br>Mean |
|                                      |                    |                 |           |              |             |           |              | Yes, No                  |                  |                     |              |           |              |              |

**Table S3. The performance of DeepGRN trained with challenge datasets only with four metrics used in the DREAM Challenge.**

| TF Name | Cell-type                     | auROC | auPRC | Recall at 50% FDR | Recall at 10% FDR |
|---------|-------------------------------|-------|-------|-------------------|-------------------|
| CTCF    | PC-3                          | 0.987 | 0.764 | 0.764             | 0.595             |
| CTCF    | induced pluripotent stem cell | 0.998 | 0.891 | 0.93              | 0.733             |
| E2F1    | K562                          | 0.989 | 0.376 | 0.338             | 0                 |
| EGR1    | liver                         | 0.993 | 0.404 | 0.307             | 0.019             |
| FOXA1   | liver                         | 0.987 | 0.544 | 0.579             | 0.155             |
| FOXA2   | liver                         | 0.985 | 0.539 | 0.573             | 0.117             |
| GABPA   | liver                         | 0.99  | 0.506 | 0.468             | 0.148             |
| HNF4A   | liver                         | 0.978 | 0.652 | 0.69              | 0.303             |
| JUND    | liver                         | 0.983 | 0.542 | 0.605             | 0.001             |
| MAX     | liver                         | 0.99  | 0.424 | 0.34              | 0.003             |
| NANOG   | induced pluripotent stem cell | 0.989 | 0.347 | 0.314             | 0.003             |
| REST    | liver                         | 0.986 | 0.47  | 0.51              | 0.025             |
| TAF1    | liver                         | 0.99  | 0.425 | 0.39              | 0                 |

**Table S4. The unified scores of DeepGRN trained with challenge datasets only and the top four algorithms in the DREAM Challenge.** Bold scores denote the category that DeepGRN ranks as the highest.

| TF    | cell                          | Anchor | FactorNet | Cheburashka | Catchitt | DeepGRN     |
|-------|-------------------------------|--------|-----------|-------------|----------|-------------|
| CTCF  | PC-3                          | 0.67   | 0.17      | 0.83        | 0.5      | 0.33        |
| CTCF  | induced pluripotent stem cell | 0.83   | 0.33      | 0.67        | 0.5      | <b>0.17</b> |
| E2F1  | K562                          | 0.33   | 0.83      | 0.67        | 0.17     | 0.5         |
| EGR1  | liver                         | 0.17   | 0.83      | 0.67        | 0.33     | 0.5         |
| FOXA1 | liver                         | 0.67   | 0.33      | 0.83        | 0.5      | <b>0.17</b> |
| FOXA2 | liver                         | 0.33   | 0.83      | 0.67        | 0.5      | <b>0.17</b> |
| GABPA | liver                         | 0.33   | 0.83      | 0.67        | 0.5      | <b>0.17</b> |
| HNF4A | liver                         | 0.67   | 0.33      | 0.83        | 0.5      | <b>0.17</b> |
| JUND  | liver                         | 0.17   | 0.83      | 0.67        | 0.5      | 0.33        |
| MAX   | liver                         | 0.17   | 0.83      | 0.33        | 0.5      | 0.67        |
| NANOG | induced pluripotent stem cell | 0.17   | 0.5       | 0.83        | 0.67     | 0.33        |
| REST  | liver                         | 0.67   | 0.33      | 0.83        | 0.5      | <b>0.17</b> |
| TAF1  | liver                         | 0.17   | 0.5       | 0.83        | 0.33     | 0.67        |

**Table S5 – Individual performance of single and pairwise attention module.** For auROC and auPRC, bold values denote a higher score in the corresponding module. Both results are from base models trained with challenge datasets only.

| TF Name | Cell type                     | Single attention |              |             |             | Pairwise attention |              |             |             |
|---------|-------------------------------|------------------|--------------|-------------|-------------|--------------------|--------------|-------------|-------------|
|         |                               | auROC            | auPRC        | Re@0.50 FDR | Re@0.10 FDR | auROC              | auPRC        | Re@0.50 FDR | Re@0.10 FDR |
| CTCF    | PC-3                          | 0.985            | 0.756        | 0.762       | 0.583       | <b>0.989</b>       | <b>0.763</b> | 0.76        | 0.59        |
| CTCF    | induced pluripotent stem cell | 0.998            | 0.883        | 0.923       | 0.712       | 0.998              | <b>0.888</b> | 0.925       | 0.73        |
| E2F1    | K562                          | 0.99             | <b>0.375</b> | 0.378       | 0           | 0.983              | 0.333        | 0.27        | 0           |
| EGR1    | liver                         | 0.992            | <b>0.396</b> | 0.309       | 0.026       | 0.992              | 0.39         | 0.281       | 0.002       |
| FOXA1   | liver                         | <b>0.989</b>     | <b>0.535</b> | 0.565       | 0.115       | 0.98               | 0.511        | 0.53        | 0.152       |
| FOXA2   | liver                         | <b>0.986</b>     | <b>0.504</b> | 0.527       | 0.052       | 0.981              | 0.469        | 0.481       | 0.055       |
| GABPA   | liver                         | 0.987            | 0.454        | 0.382       | 0.134       | <b>0.99</b>        | <b>0.511</b> | 0.479       | 0.135       |
| HNF4A   | liver                         | <b>0.98</b>      | <b>0.652</b> | 0.699       | 0.286       | 0.973              | 0.636        | 0.679       | 0.273       |
| JUND    | liver                         | 0.981            | <b>0.545</b> | 0.615       | 0.013       | <b>0.982</b>       | 0.502        | 0.557       | 0           |
| MAX     | liver                         | <b>0.991</b>     | <b>0.422</b> | 0.322       | 0.001       | 0.988              | 0.414        | 0.326       | 0.003       |
| NANOG   | induced pluripotent stem cell | <b>0.99</b>      | <b>0.343</b> | 0.292       | 0           | 0.98               | 0.307        | 0.261       | 0.001       |
| REST    | liver                         | <b>0.986</b>     | <b>0.461</b> | 0.469       | 0.009       | 0.984              | 0.433        | 0.376       | 0.028       |
| TAF1    | liver                         | 0.989            | <b>0.426</b> | 0.391       | 0           | 0.989              | 0.416        | 0.361       | 0.002       |
