# Supplementary material for: DeepGRN: prediction of transcription factor binding site across cell-types using attention-based deep neural networks
Source: PubMed Central journal article supplement (PMC7852092; doi:10.1186/s12859-020-03952-1), 2021-02-01
Supplement: 12859_2020_3952_MOESM2_ESM.pdf [file 12859_2020_3952_MOESM2_ESM.pdf]

# Instructions of training, prediction, and visualization data with DeepGRN

Chen Chen 3/1/2020

This file includes retrieving data used in training, prediction with DeepGRN and the implementation details of the visualization scripts used in the main text. All codes mentioned in this section can be found at <https://github.com/jianlin-cheng/DeepGRN>.

## Download and process the input data for DeepGRN (using ENCODE-DREAM data as example):

Assuming all feature data will be generated at \$DATAPATH (e.g. /home/yourname/data/inputs/) Create directory structures

```
mkdir -p $DATAPATHbams
mkdir -p $DATAPATHDNase
mkdir -p $DATAPATHchipseq
mkdir -p $DATAPATHgencode
mkdir -p $DATAPATHlabel/train
mkdir -p $DATAPATHlabel/leaderboard
mkdir -p $DATAPATHlabel/final
mkdir -p $DATAPATHlabel/train_positive
mkdir -p $DATAPATHlabel/train_negative
```

Download annotation files for genomic elements

```
cd $DATAPATHgencode
wget https://github.com/uci-
cbcl/FactorNet/raw/master/resources/wgEncodeGencodeBasicV19.cds.merged.bed.g
wget https://github.com/uci-
cbcl/FactorNet/raw/master/resources/wgEncodeGencodeBasicV19.intron.merged.be
wget https://github.com/uci-
cbcl/FactorNet/raw/master/resources/wgEncodeGencodeBasicV19.promoter.merged.
wget https://github.com/uci-
cbcl/FactorNet/raw/master/resources/wgEncodeGencodeBasicV19.txStart.bed.gz
wget https://github.com/uci-
cbcl/FactorNet/raw/master/resources/wgEncodeGencodeBasicV19.utr3.merged.bed.
wget https://github.com/uci-
cbcl/FactorNet/raw/master/resources/wgEncodeGencodeBasicV19.utr5.merged.bed.
```

Get data from synapse(ChIP-Seq files, DNase files)

```
python get_syn_data.py $DATAPATH
```

Generate region file for prediction

```
cd $DATAPATHlabel/
gzip -d *.gz
awk '$1 == "chr1" {print}' test_regions.blacklistfiltered.bed > predict_region.bed
awk '$1 == "chr21" {print}' test_regions.blacklistfiltered.bed >> predict_region.bed
```

```
awk '$1 == "chr8" {print}' test_regions.blacklistfiltered.bed >> predict_region.bed
```

Download blacklist file, genome file, and uniqueness file from FactorNet repository since we also need to process the data by the way FactorNet did.

```
cd $DATAPATH
wget https://github.com/uci-cbcl/FactorNet/raw/master/resources/blacklist.bed.gz
wget https://raw.githubusercontent.com/uci-cbcl/FactorNet/master/resources/hg19.autoX.chrom.sizes
# get unique 35 data
wget
http://hgdownload.cse.ucsc.edu/goldenpath/hg19/encodeDCC/wgEncodeMapability/wgEncodeDukeMapabilityU
wget
http://hgdownload.cse.ucsc.edu/goldenpath/hg19/encodeDCC/wgEncodeMapability/wgEncodeDacMapabilityCo
```

Generate 2 missing bigwig files(A549 and IMR-90) from bams

```
cd $DATAPATHbams
samtools merge A549.bam DNASE.A549.*
samtools index A549.bam
bamCoverage --bam A549.bam -o ../DNase/A549.1x.bw --outFileFormat bigwig --normalizeTo1x
2478297382 --ig
samtools merge IMR-90.bam DNASE.IMR90.*
samtools index IMR-90.bam
bamCoverage --bam IMR-90.bam -o ../DNase/IMR-90.1x.bw --outFileFormat bigwig --normalizeTo1x
2478297382
```

Generate masks for genomic elements and blacklists, these can be user defined as long as they are binary(0,1) vectors with the same length with the training/prediction bins. For genomic elements, 0 means not overlapping and 1 means overlapping for each bin. For blacklists zero means overlapping with black list. Those bins will not be trained and force to be 0 in prediction.

```
cd $DATAPATH../src
python get_mask_files.py
```

get\_rawdata/get\_data.sh provided a demo to generate all the required data for the Dream-Encode Challenge 2016 in one step:

```
bash get_rawdata/get_data.sh /home/yourname/data/inputs/
```

## Required softwares:

To use DeepGRN on your local machine, please make sure the following required softwares are already installed:

```
Python 3.6.6
bedtools 2.26.0
```

Python modules:

```
pandas 0.24.2
```

numpy 1.16.2  
tensorflow 1.11.0  
pyfaidx 0.5.5.2  
pyfasta 0.5.2  
pybedtools 0.8.0  
pyBigWig 0.3.14  
Keras 2.2.4  
h5py 2.9.0  
deepTools 3.2.1

Optional(for training with GPUs):

cuda 10  
tensorflow-gpu 1.11.0

## Training

(train.py)

Train models for TF binding site prediction:

usage: train.py [-h] --data\_dir DATA\_DIR --tf\_name TF\_NAME --output\_dir  
OUTPUT\_DIR [--attention\_position ATTENTION\_POSITION]

## Arguments

[--flanking FLANKING] [--val\_chr VAL\_CHR] [--epochs EPOCHS]  
[--patience PATIENCE] [--batch\_size BATCH\_SIZE]  
[--learningrate LEARNINGRATE] [--kernel\_size KERNEL\_SIZE]  
[--num\_filters NUM\_FILTERS] [--num\_recurrent NUM\_RECURRENT]  
[--num\_dense NUM\_DENSE] [--dropout\_rate DROPOUT\_RATE]  
[--rnn\_dropout1 RNN\_DROPOUT1] [--rnn\_dropout2 RNN\_DROPOUT2]  
[--merge MERGE] [--num\_conv NUM\_CONV] [--num\_lstm NUM\_LSTM]  
[--num\_denselayer NUM\_DENSELAYER]  
[--ratio\_negative RATIO\_NEGATIVE] [--rnaseq] [--gencode]  
[--unique35] [--conservative] [--cgi\_score] [--use\_peak] [--use\_cudnn]  
[--single\_attention\_vector] [--plot\_model]  
[--random\_seed RANDOM\_SEED]

- -h, --help show this help message and exit
- --data\_dir DATA\_DIR, -i DATA\_DIR data path
- --tf\_name TF\_NAME, -t TF\_NAME name of TF
- --output\_dir OUTPUT\_DIR, -o OUTPUT\_DIR output dir
- --attention\_position ATTENTION\_POSITION, -ap ATTENTION\_POSITION Position of attention lay-

ers, can be attention1d\_after\_lstm, attention\_before\_lstm, attention\_after\_lstm, attention1d\_after\_lstm

- --flanking FLANKING, -f FLANKING flanking
- --val\_chr VAL\_CHR, -v VAL\_CHR validation chr
- --epochs EPOCHS, -e EPOCHS epochs
- --patience PATIENCE, -p PATIENCE patience for training cycle
- --batch\_size BATCH\_SIZE, -s BATCH\_SIZE batch size
- --learningrate LEARNINGRATE, -l LEARNINGRATE learning rate

- --kernel\_size KERNEL\_SIZE, -k KERNEL\_SIZE kernel\_size for Conv1D
- --num\_filters NUM\_FILTERS, -nf NUM\_FILTERS number of filters for Conv1D
- --num\_recurrent NUM\_RECURRENT, -nr NUM\_RECURRENT Output dim for LSTM
- --num\_dense NUM\_DENSE, -nd NUM\_DENSE Output dim for dense layers
- --dropout\_rate DROPOUT\_RATE, -d DROPOUT\_RATE dropout rate for all layers except LSTM
- --rnn\_dropout1 RNN\_DROPOUT1, -rd1 RNN\_DROPOUT1 dropout rate for LSTM
- --rnn\_dropout2 RNN\_DROPOUT2, -rd2 RNN\_DROPOUT2 rnn dropout rate for LSTM
- --merge MERGE, -me MERGE merge method, max or ave
- --num\_conv NUM\_CONV, -nc NUM\_CONV Number of Conv1D layers
- --num\_lstm NUM\_LSTM, -nl NUM\_LSTM Number of LSTM layers
- --num\_denselayer NUM\_DENSELAYER, -dl NUM\_DENSELAYER Number of additional dense layers
- --ratio\_negative RATIO\_NEGATIVE, -rn RATIO\_NEGATIVE Ratio of negative samples to positive

samples in each epoch

- --rnaseq, -r should rnaseq data be used
- --gencode, -g should gencode data be used
- --unique35, -u should unique35 data be used
- --conservative, -cv should conservation data be used
- --cgi\_score, -ci should CGI score be used
- --use\_peak, -a should the training be performed in “augmented” style
- --use\_cudnn, -c use cudnnLSTM instead of LSTM, faster but will disable LSTM dropouts
- --single\_attention\_vector, -sa merge attention weights in each position by averaging
- --plot\_model, -pl plot model as png file
- --random\_seed RANDOM\_SEED, -rs RANDOM\_SEED random seed

## Prediction

(predict.py)

Use models trained from train.py for new data prediction:

```
usage: predict.py [-h] --data_dir DATA_DIR --model_file MODEL_FILE --cell_name
CELL_NAME --predict_region_file PREDICT_REGION_FILE
```

Predict a model.

## Arguments

```
--output_predict_path OUTPUT_PREDICT_PATH
[--batch_size BATCH_SIZE] [--blacklist_file BLACKLIST_FILE]
```

- -h, --help show this help message and exit
- --data\_dir DATA\_DIR, -i DATA\_DIR data path
- --model\_file MODEL\_FILE, -m MODEL\_FILE model file
- --cell\_name CELL\_NAME, -c CELL\_NAME cell name
- --predict\_region\_file PREDICT\_REGION\_FILE, -p PREDICT\_REGION\_FILE predict region file
- --output\_predict\_path OUTPUT\_PREDICT\_PATH, -o OUTPUT\_PREDICT\_PATH output for predict
- --batch\_size BATCH\_SIZE, -b BATCH\_SIZE batch size
- --blacklist\_file BLACKLIST\_FILE, -l BLACKLIST\_FILE blacklist file to use, can be left empty
