# Supplementary material for: DeepGRN: prediction of transcription factor binding site across cell-types using attention-based deep neural networks
Source: Springer Nature journal article supplement (doi:10.1186/s12859-020-03952-1), 2021-02-01
Supplement: 12859_2020_3952_MOESM3_ESM.pdf [file 12859_2020_3952_MOESM3_ESM.pdf]

## **Visualization of the relationship between ChIP-seq peak and attention weights.**

For each genomic region, the figure on the left represents the attention weights and the figure on the right represents the enrichment of fold changes in ChIP-seq BigWig file in the same region. Since the lengths of attention weights are reduced by the convolution and pooling layers, their lengths are less than the fold change values. Thus, the plots are aligned on the X-axis to represent the relative position of fold change and averaged attention weights.

The attention scores are extracted from both single and pairwise models. For single module, the dimension of attention scores is  $L \times d_{model}$ , and the channel that contains the highest attention weight is used. Similarly, for pairwise module, the dimension of attention scores is  $L \times L$ , and the row sum of these weights are always 1. As a result, we use the row that contains the highest attention weight.

# Single attention module

## CTCF/induced pluripotent stem cell

chr1 176528348 - 176529350

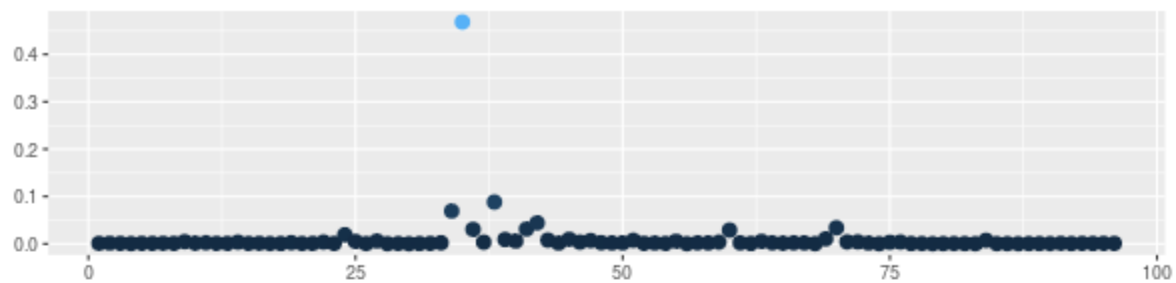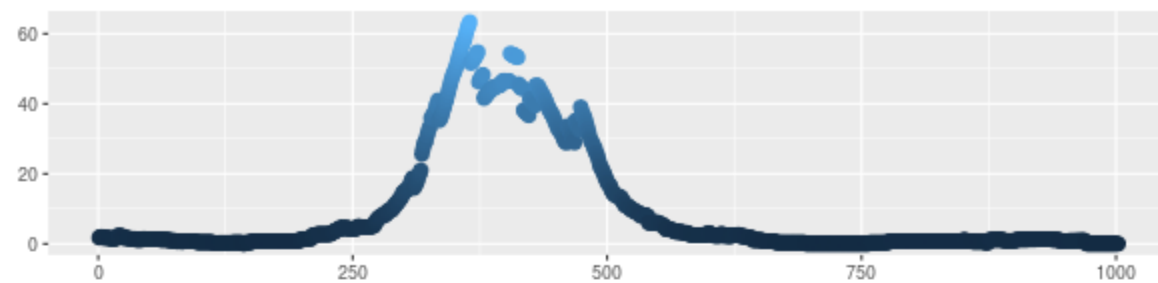

chr8 82541998 - 82543000

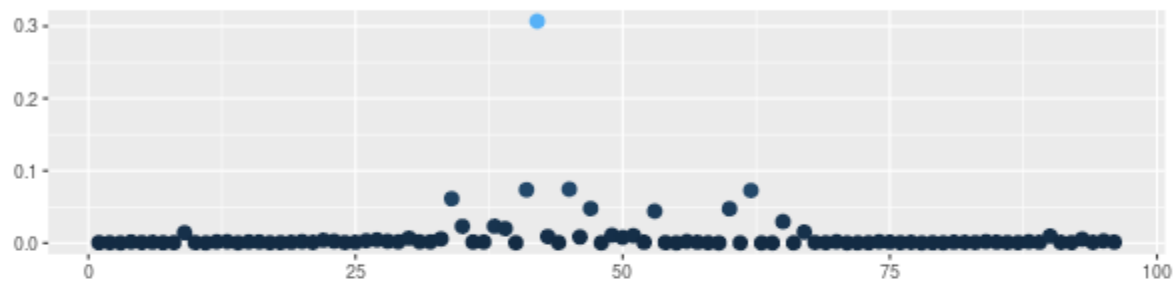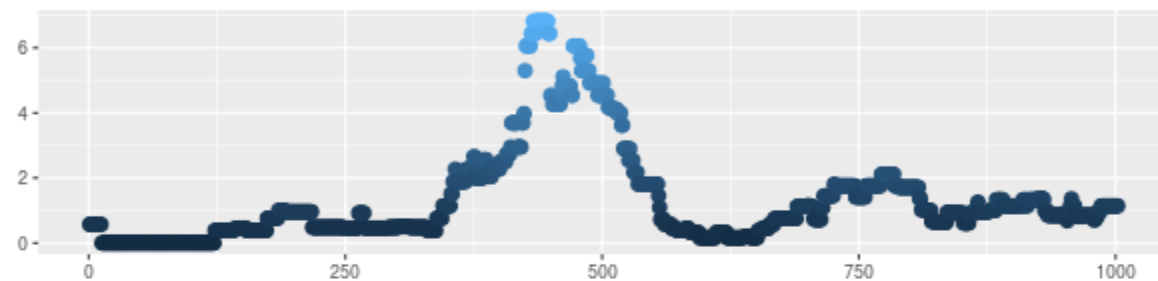

chr1 26360998 - 26362000

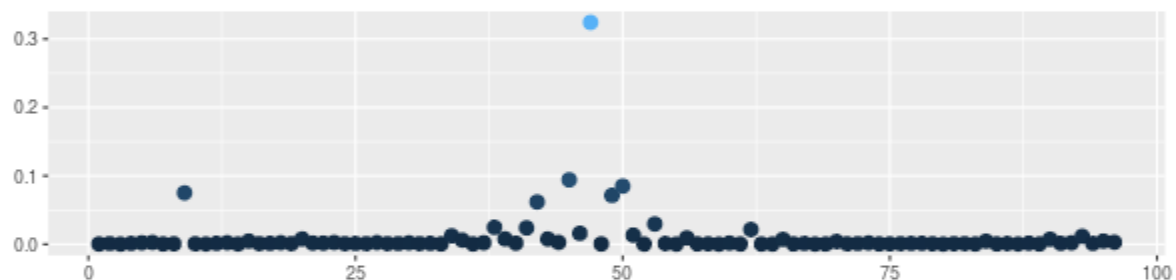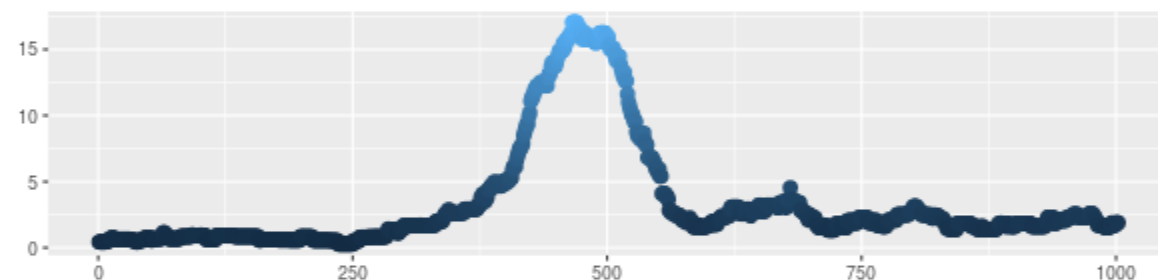

chr1 85409548 - 85410550

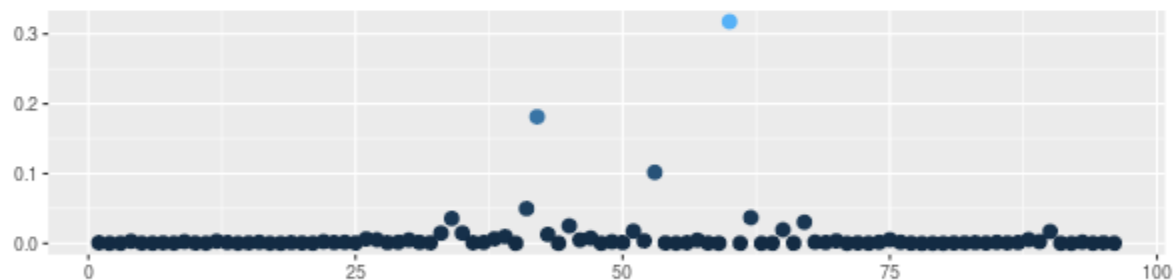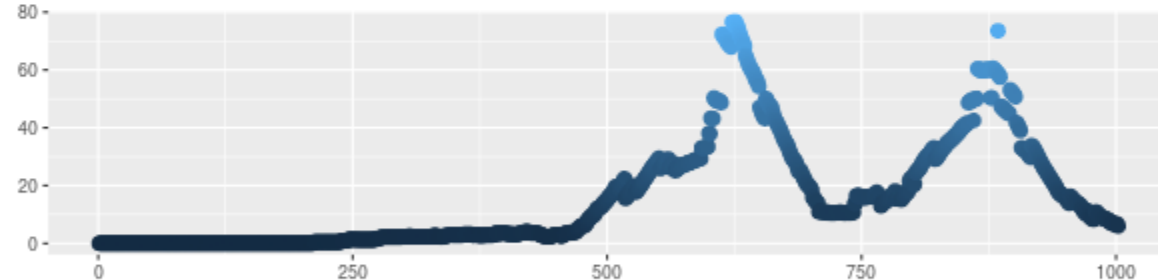

chr8 48422648 - 48423650

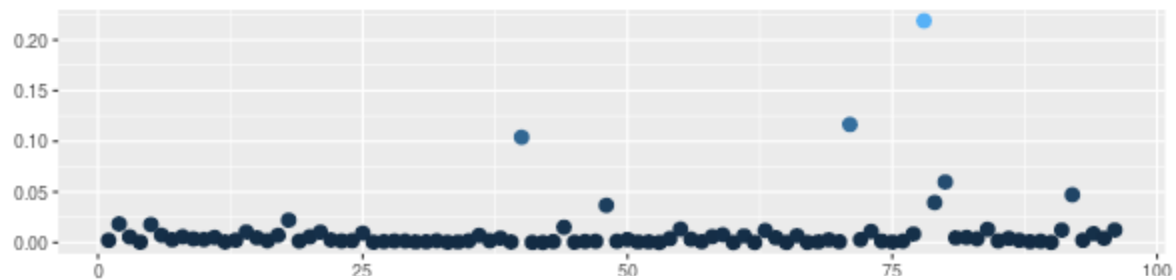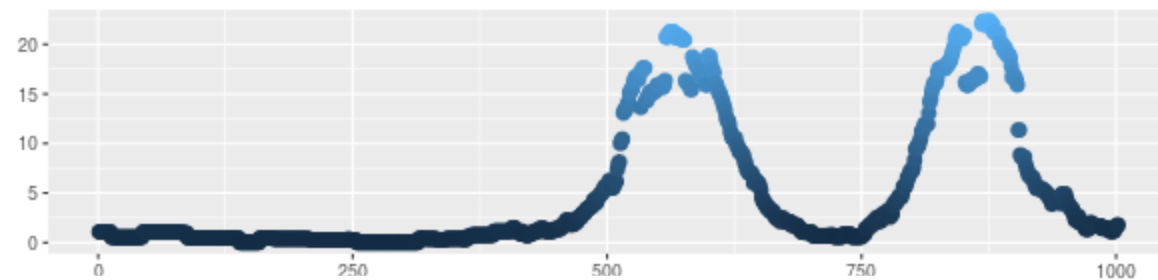

Attention weights

ChIP-seq score

# Single attention module

## CTCF/PC-3

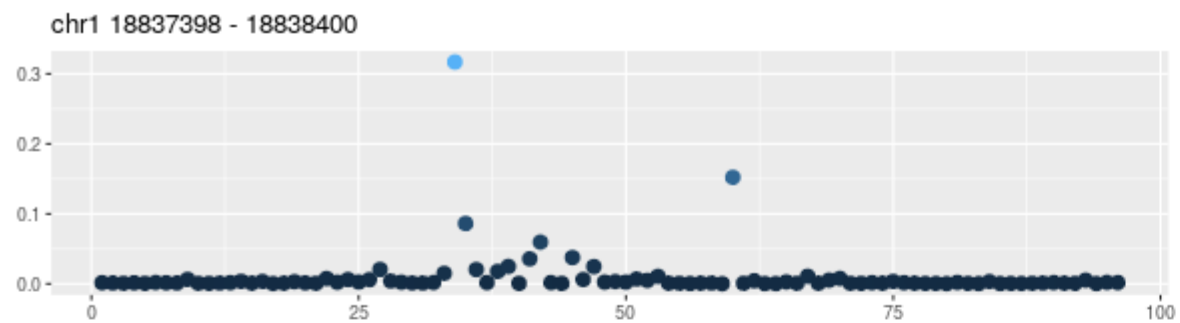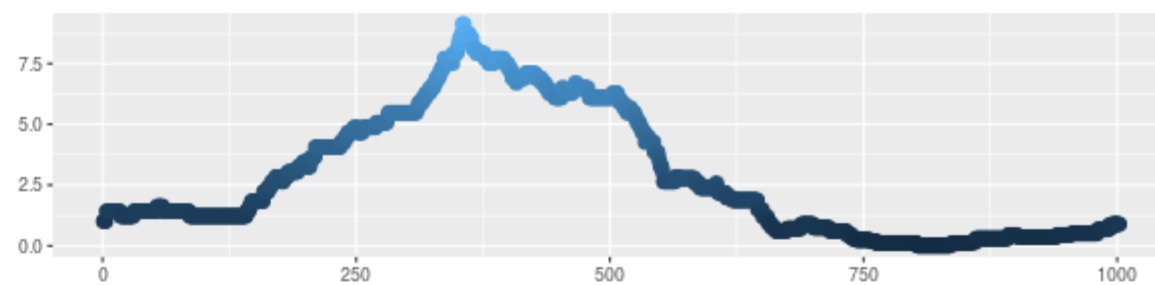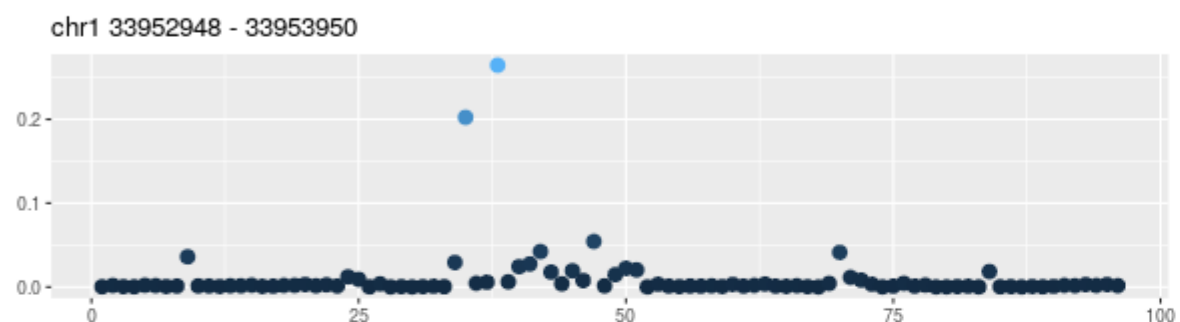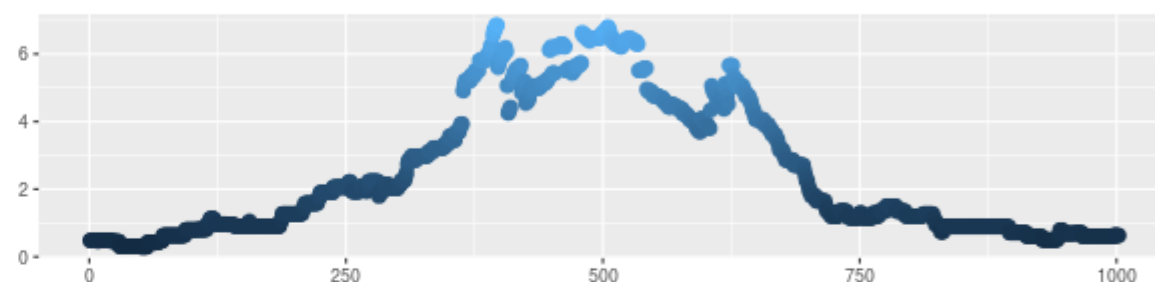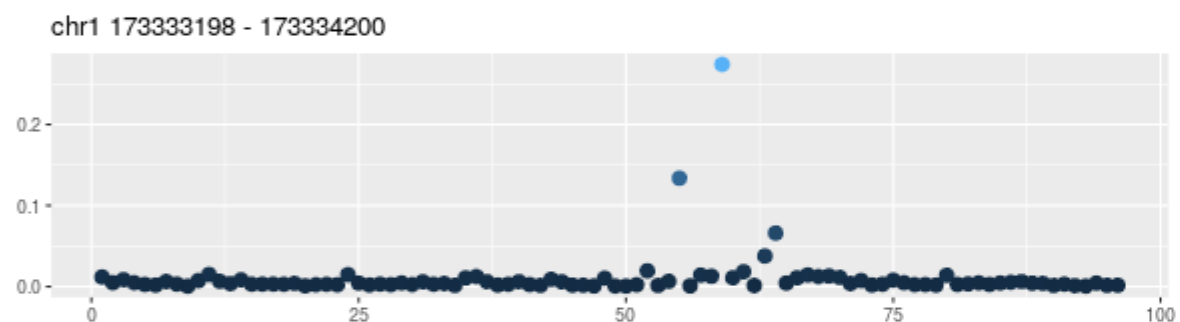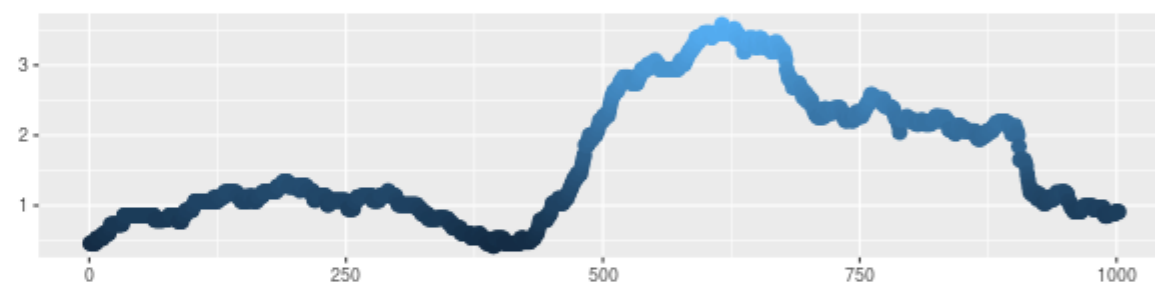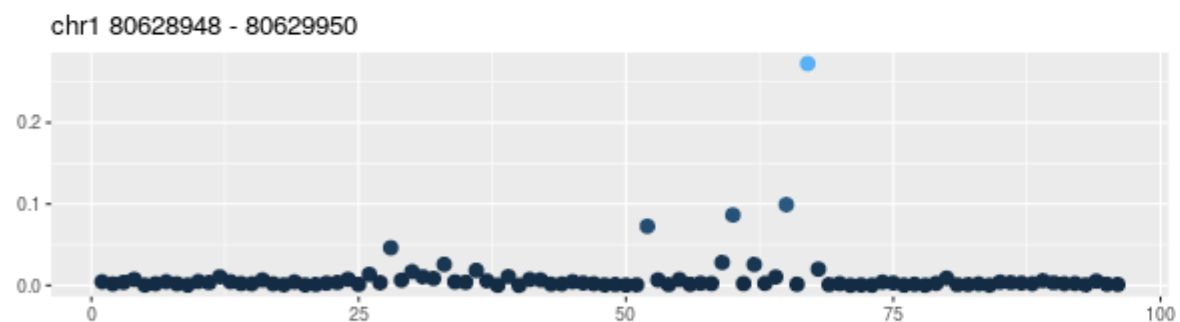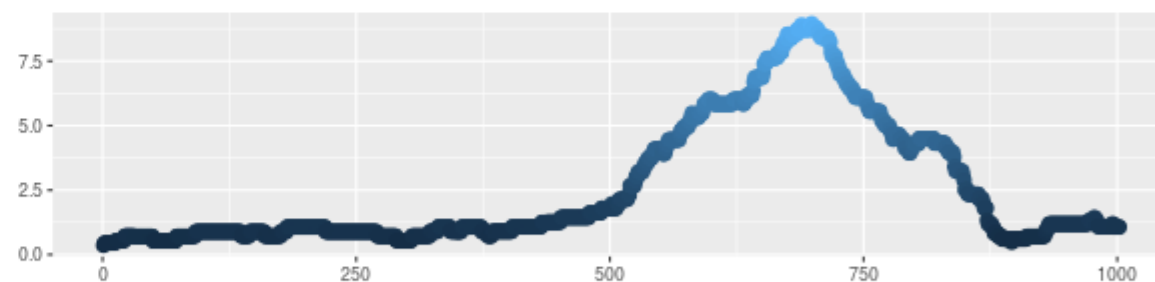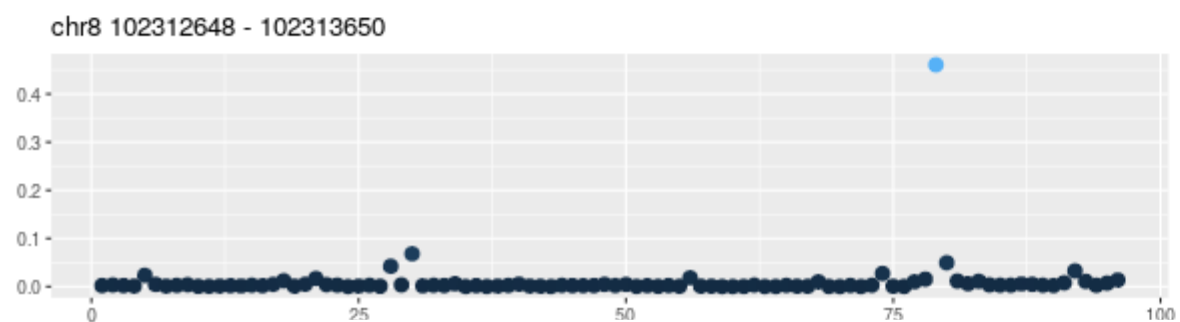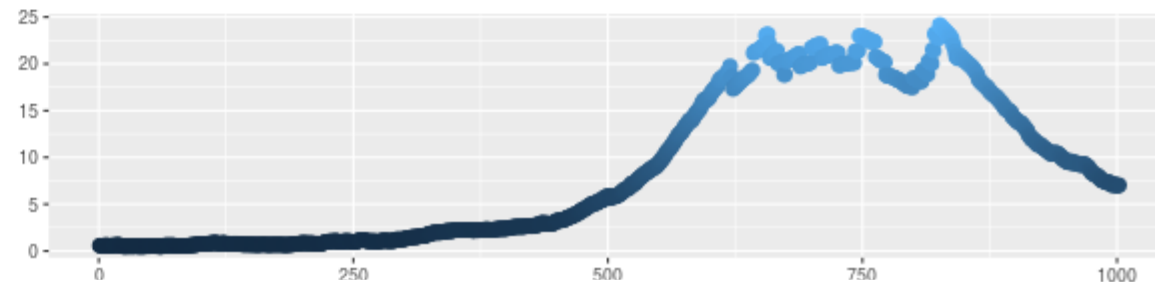

Attention weights

ChIP-seq score

# Single attention module

## E2F1/K562

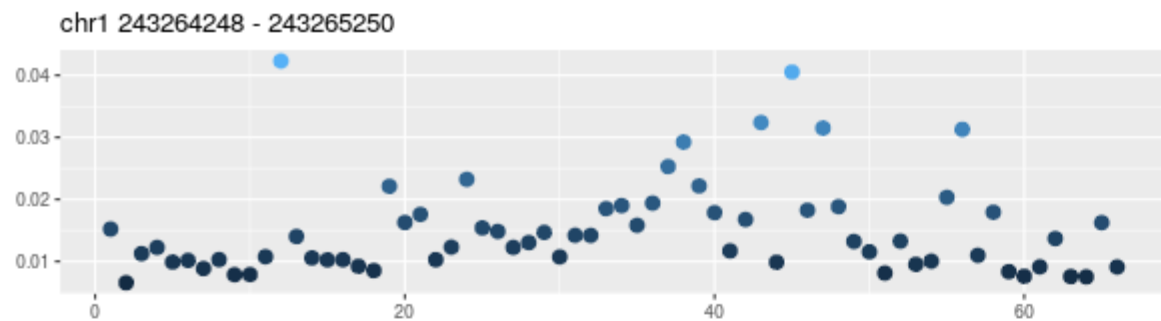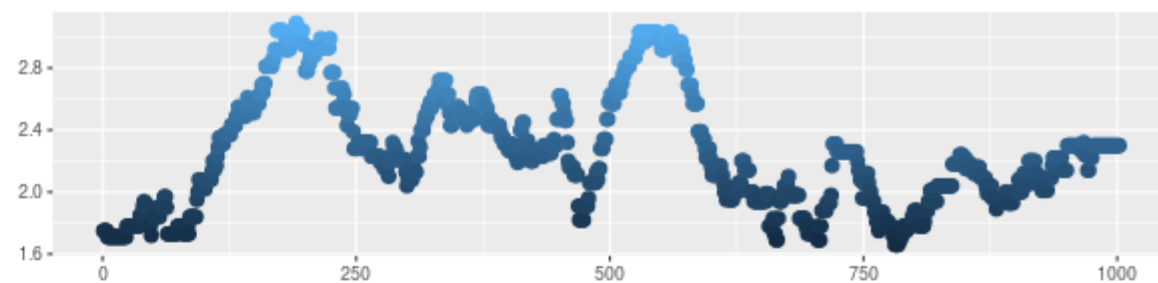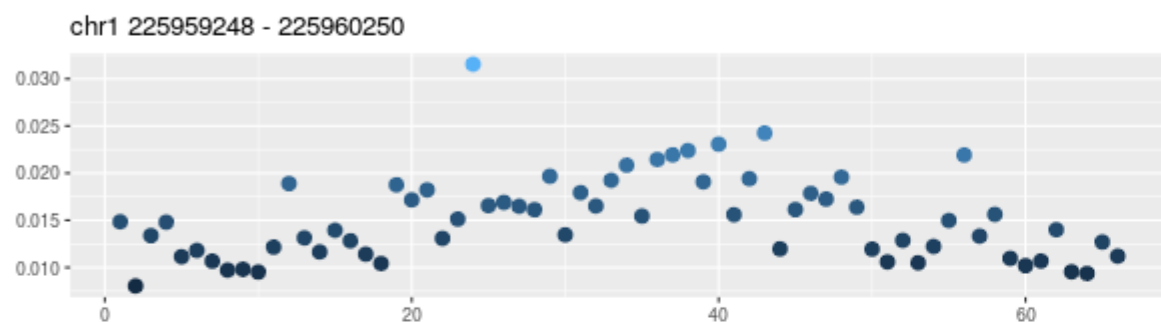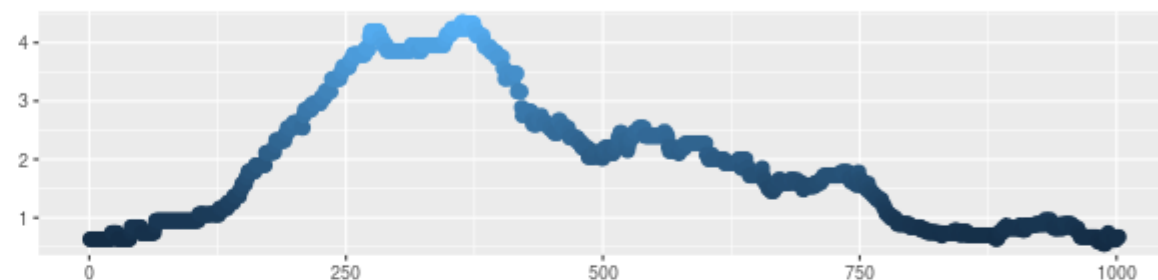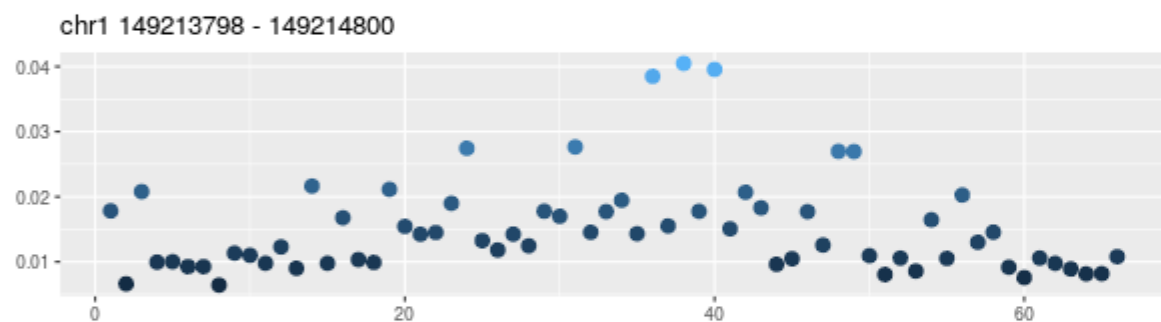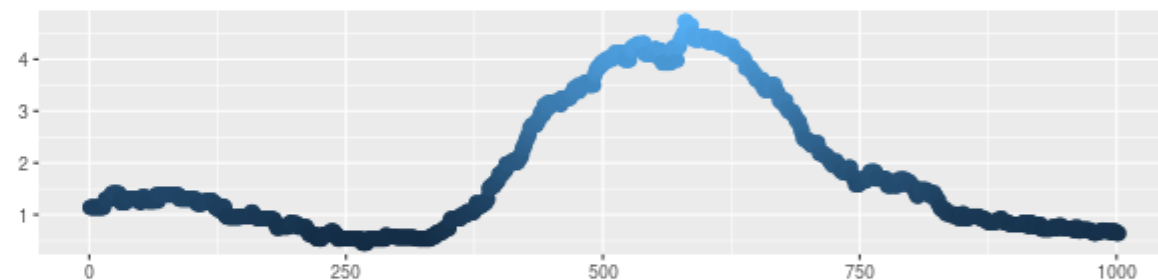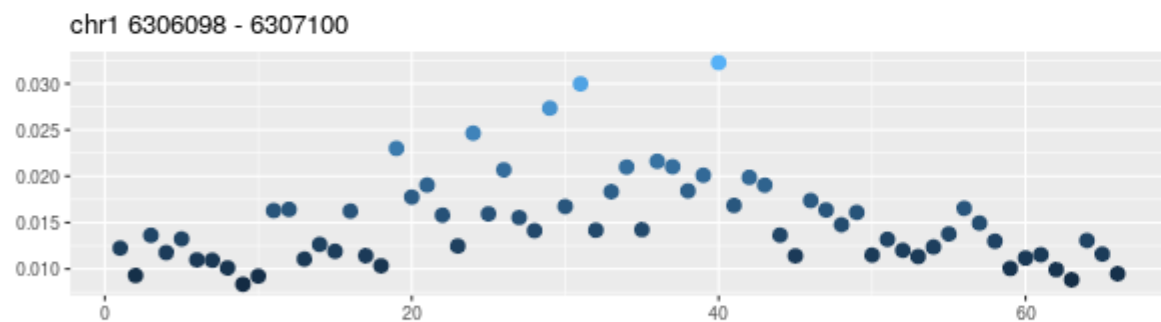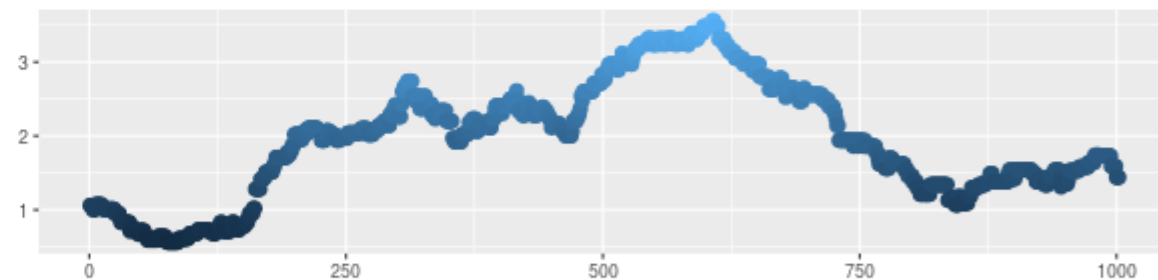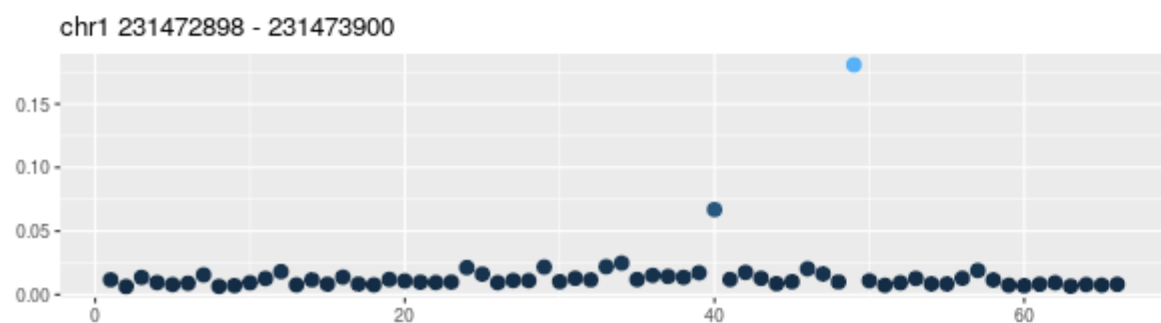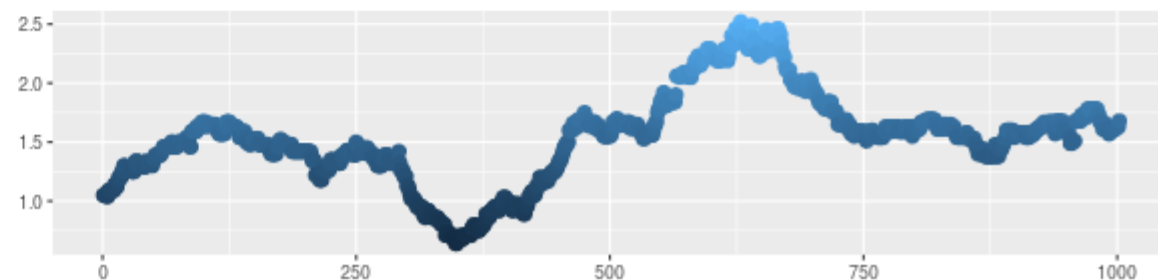

Attention weights

CHIP-seq score

# Single attention module

## EGR1/liver

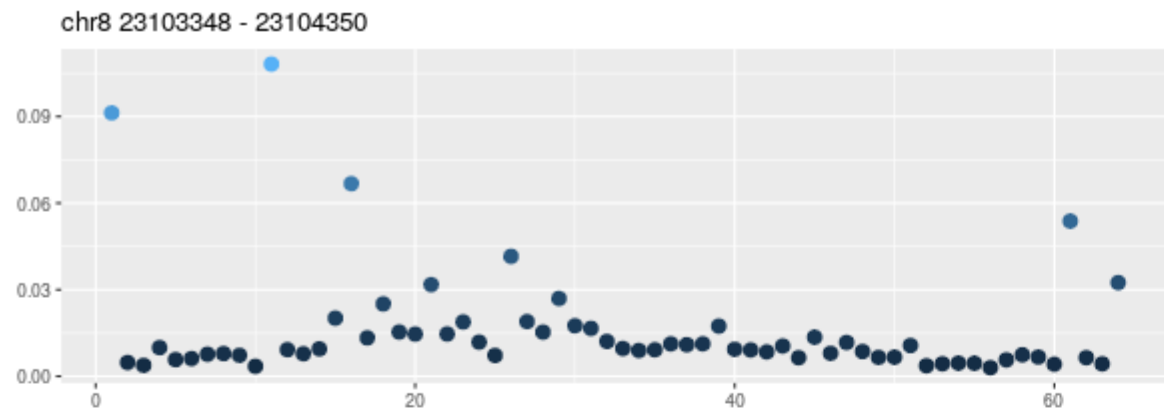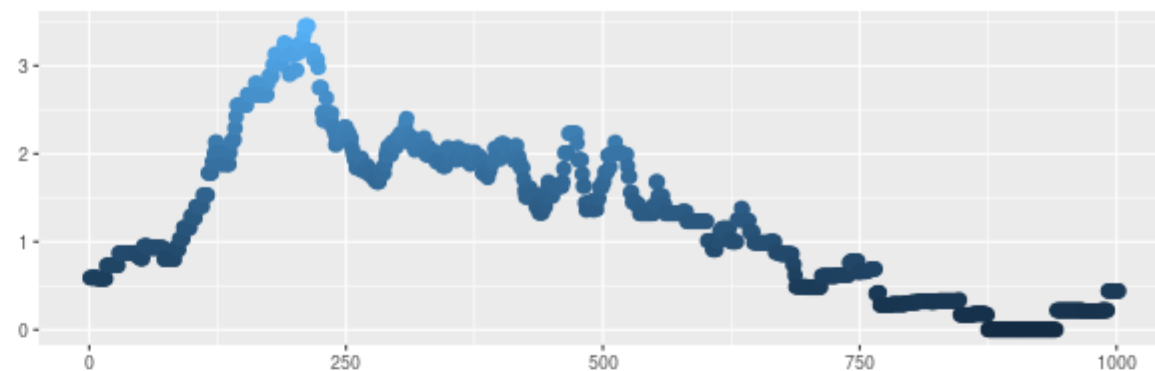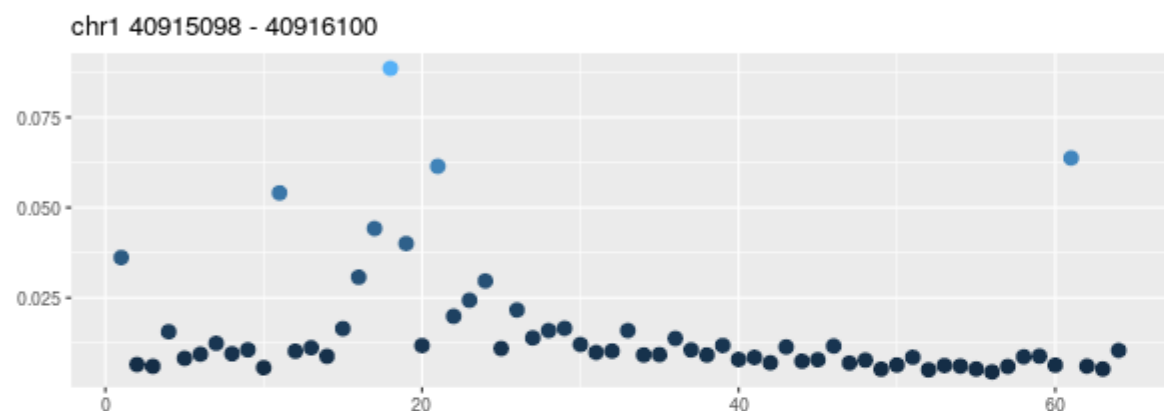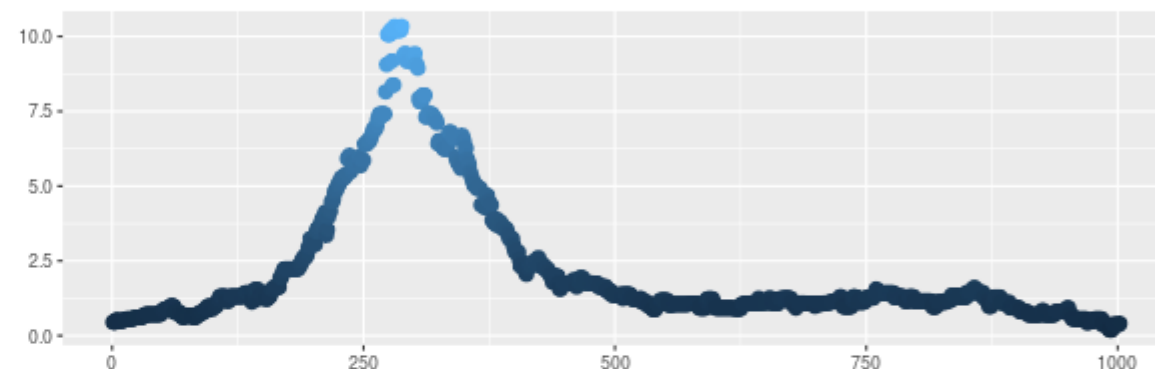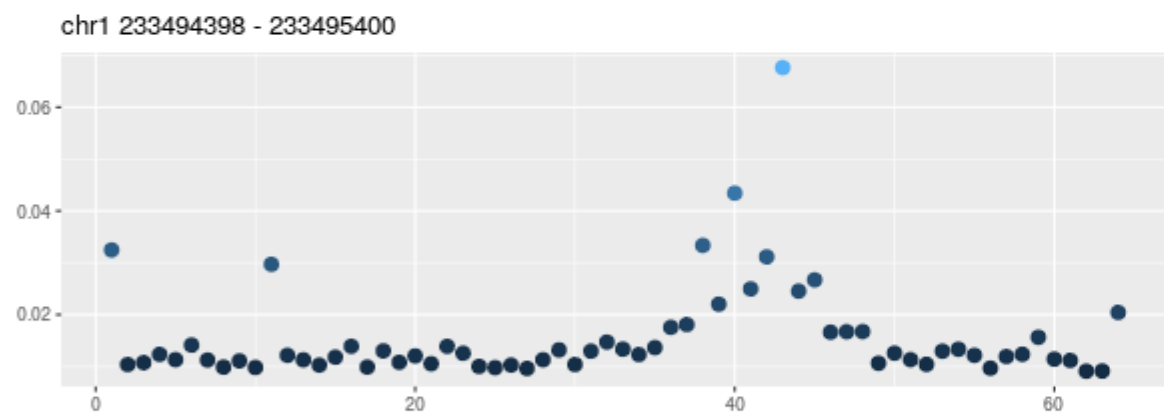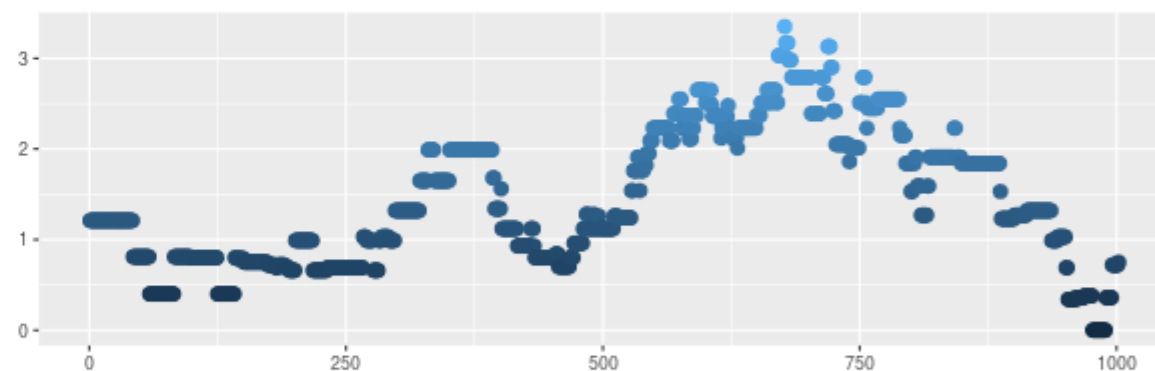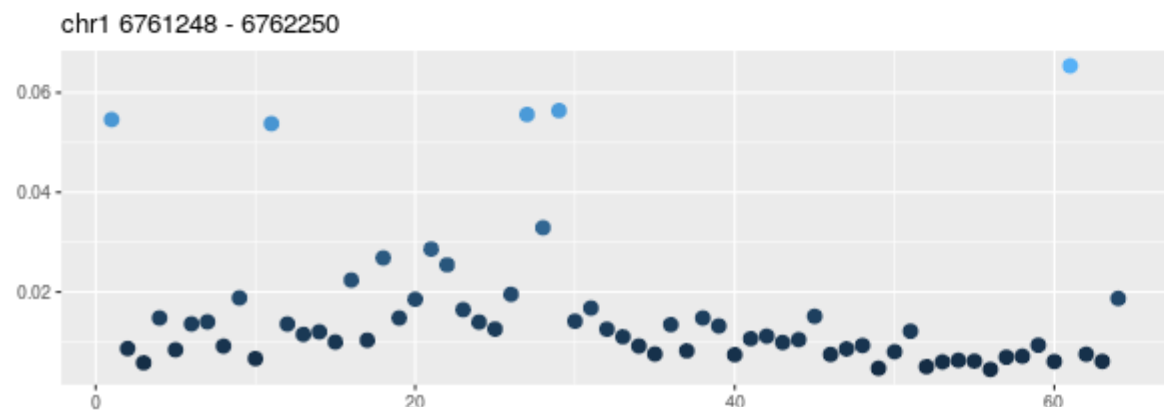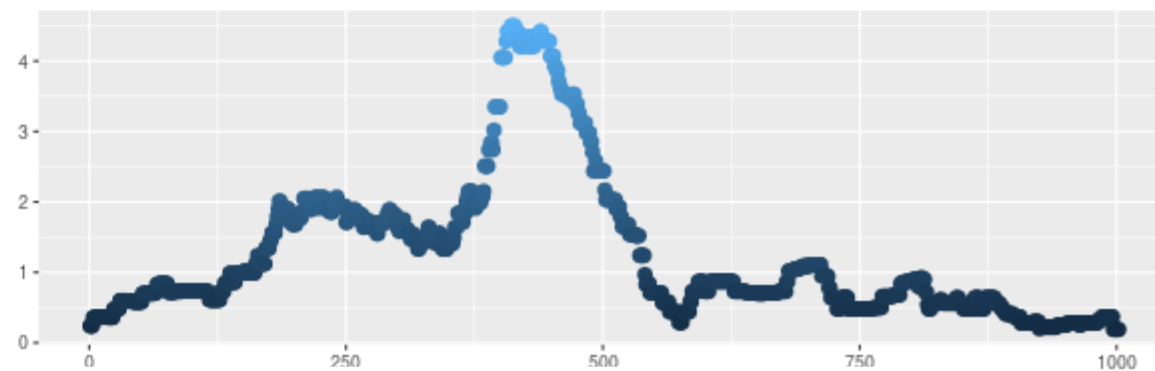

# Single attention module

## FOXA1/liver

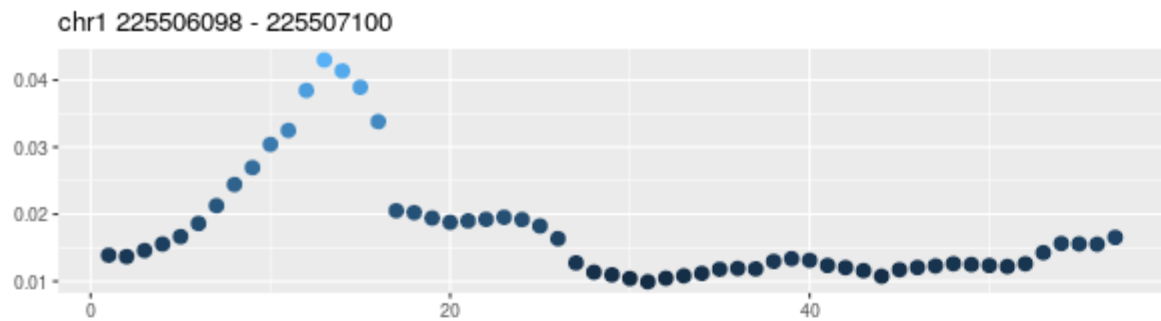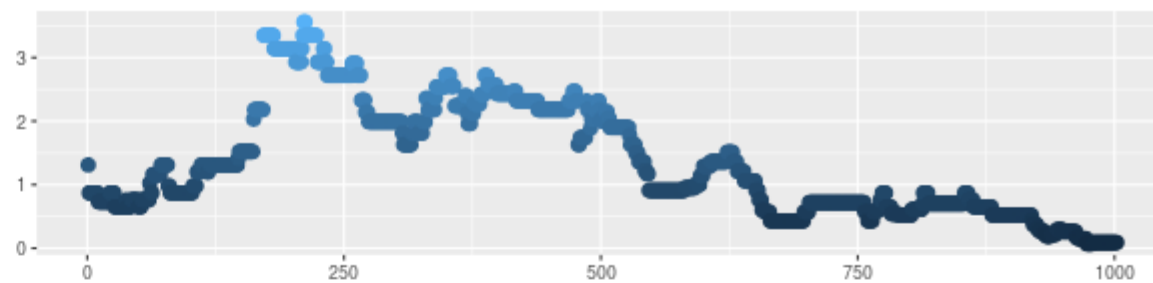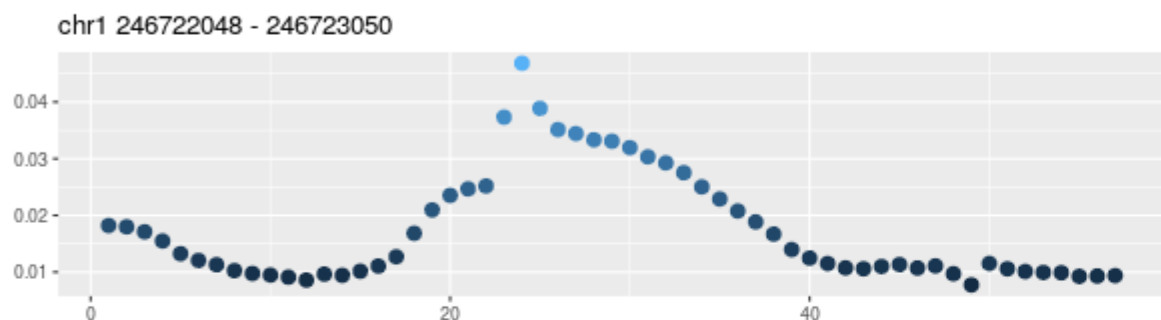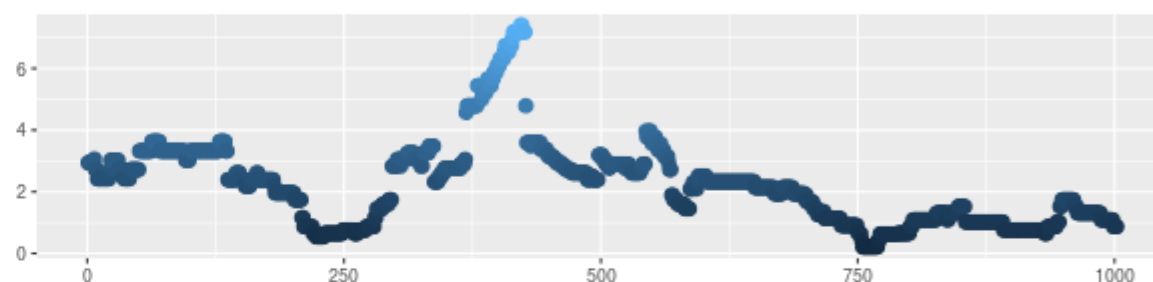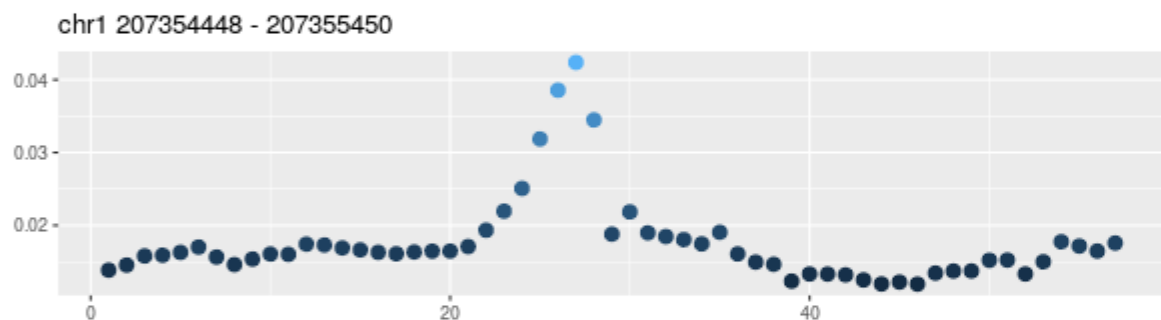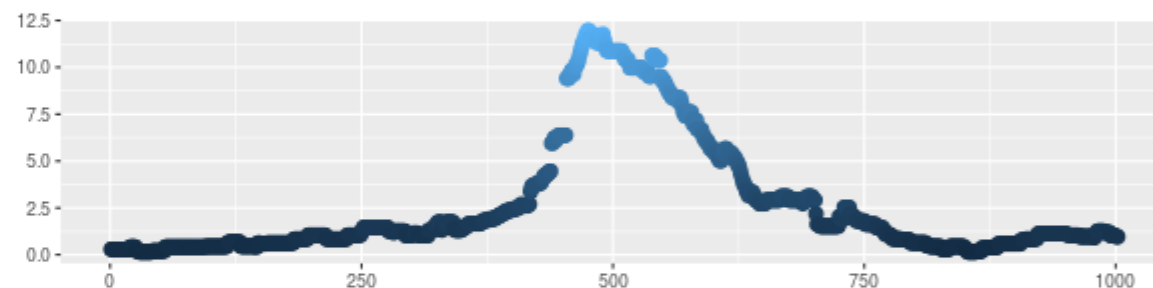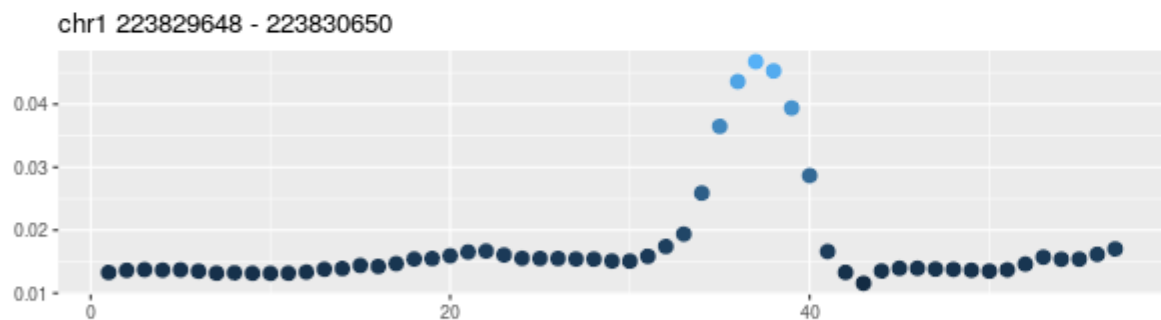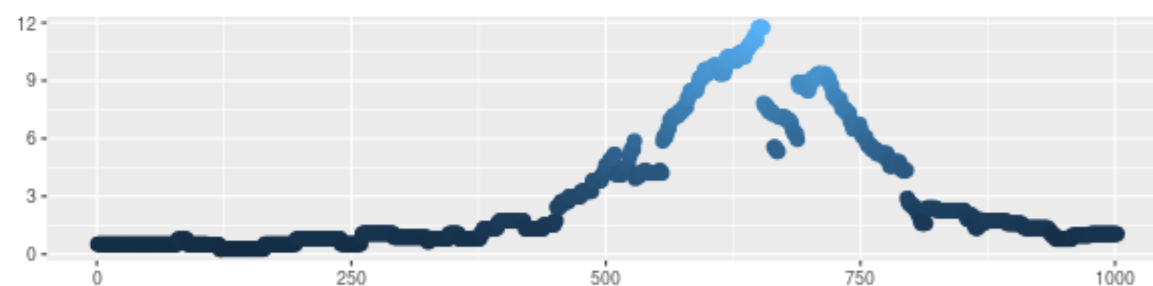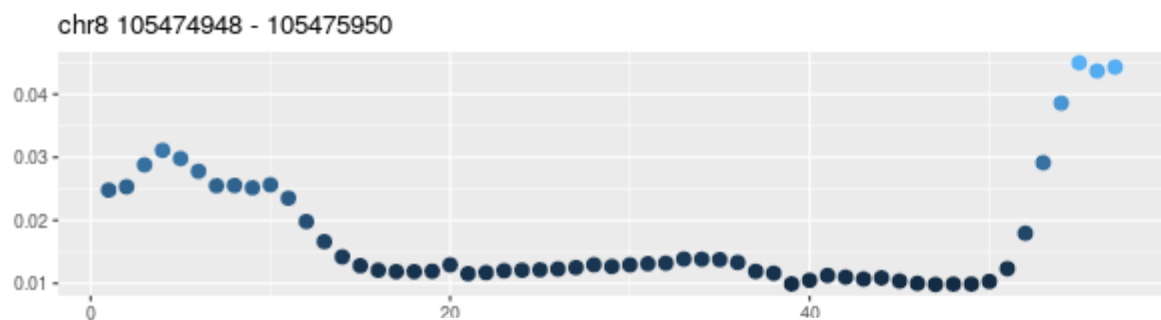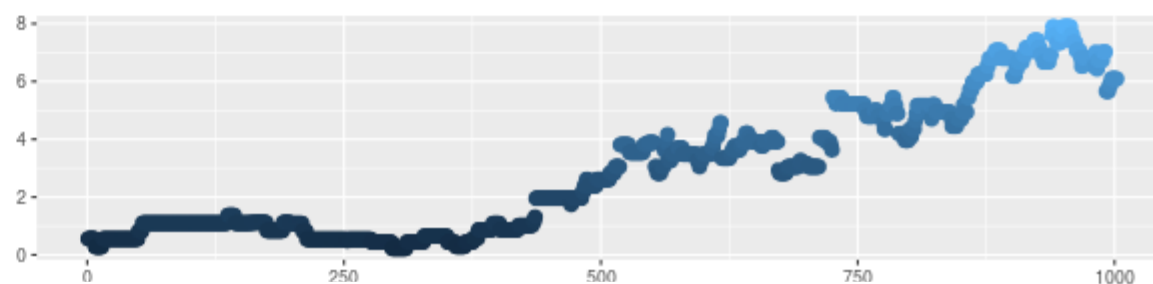

Attention weights

ChIP-seq score

# Single attention module

## FOXA2/liver

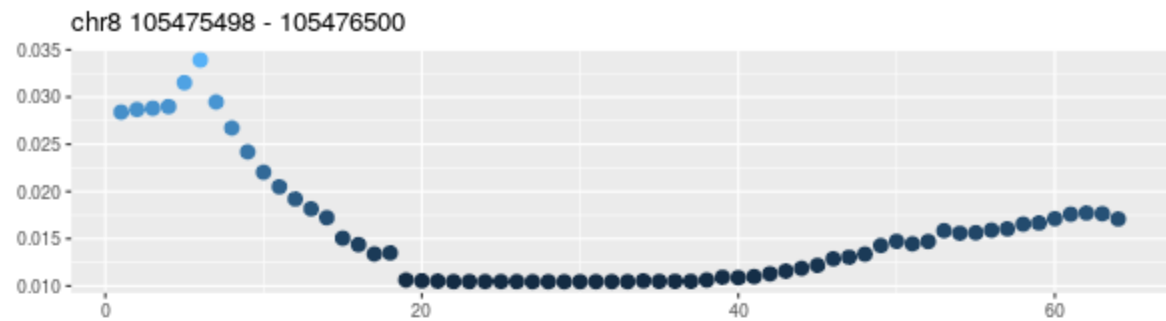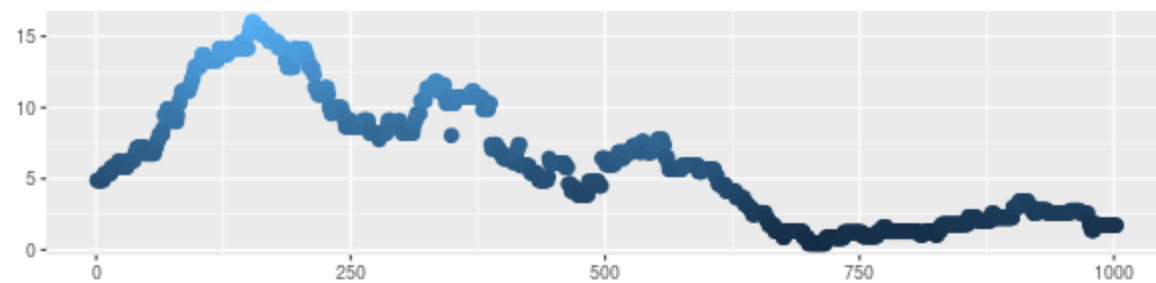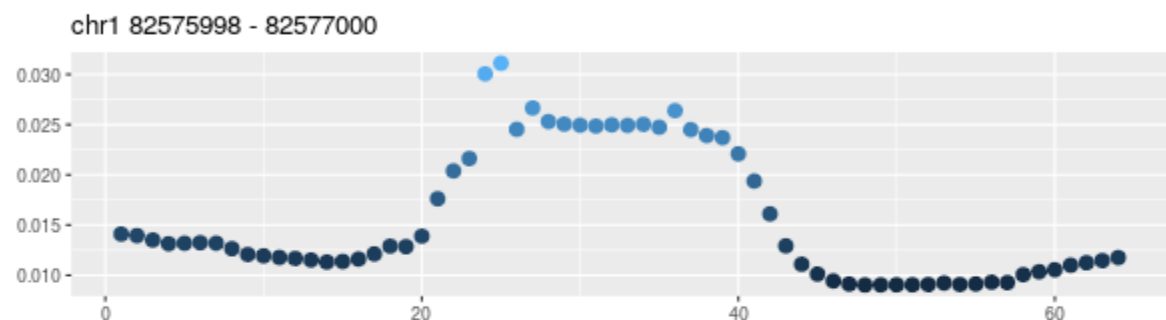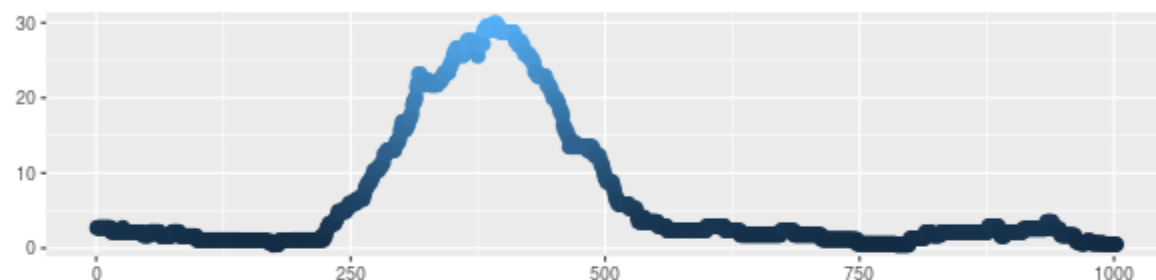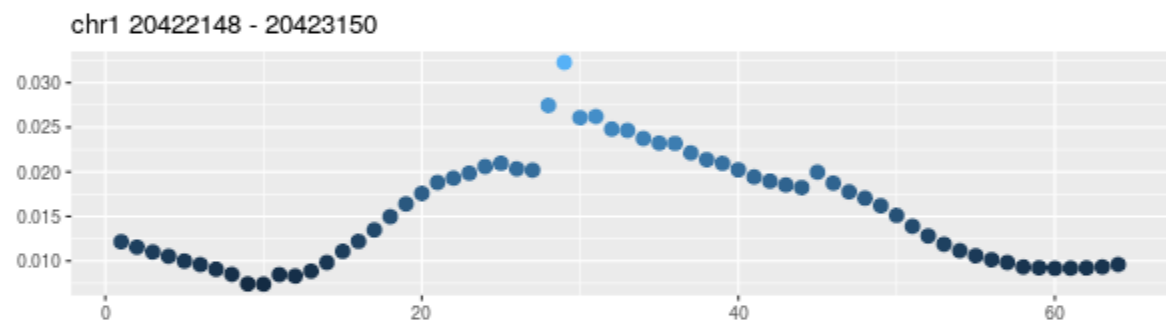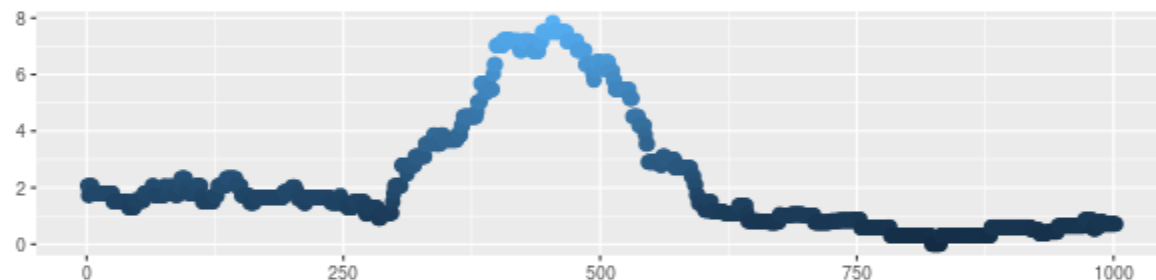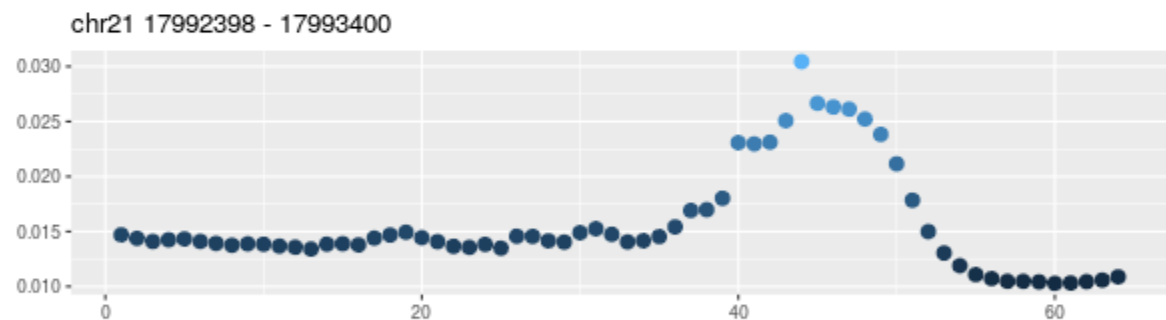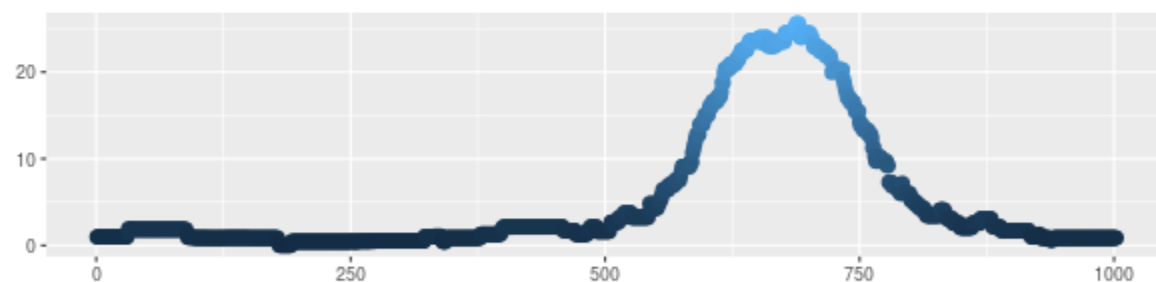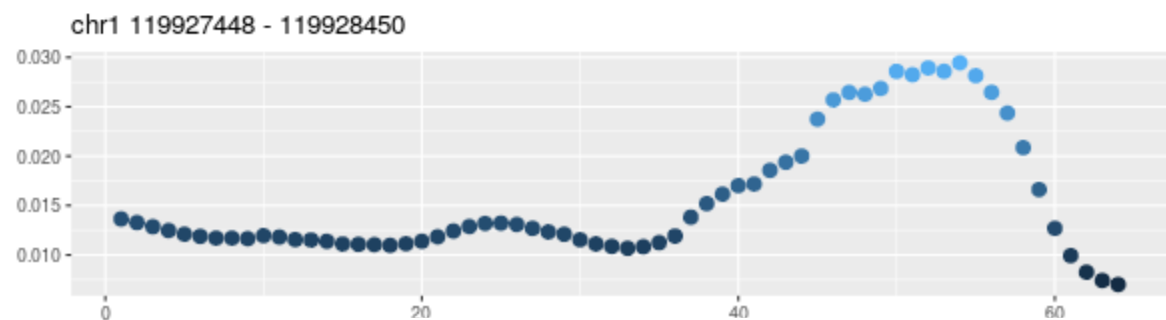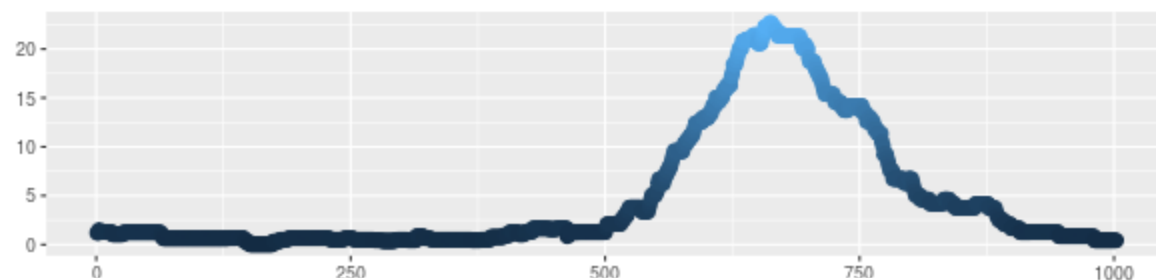

Attention weights

ChIP-seq score

# Single attention module

## GABPA/liver

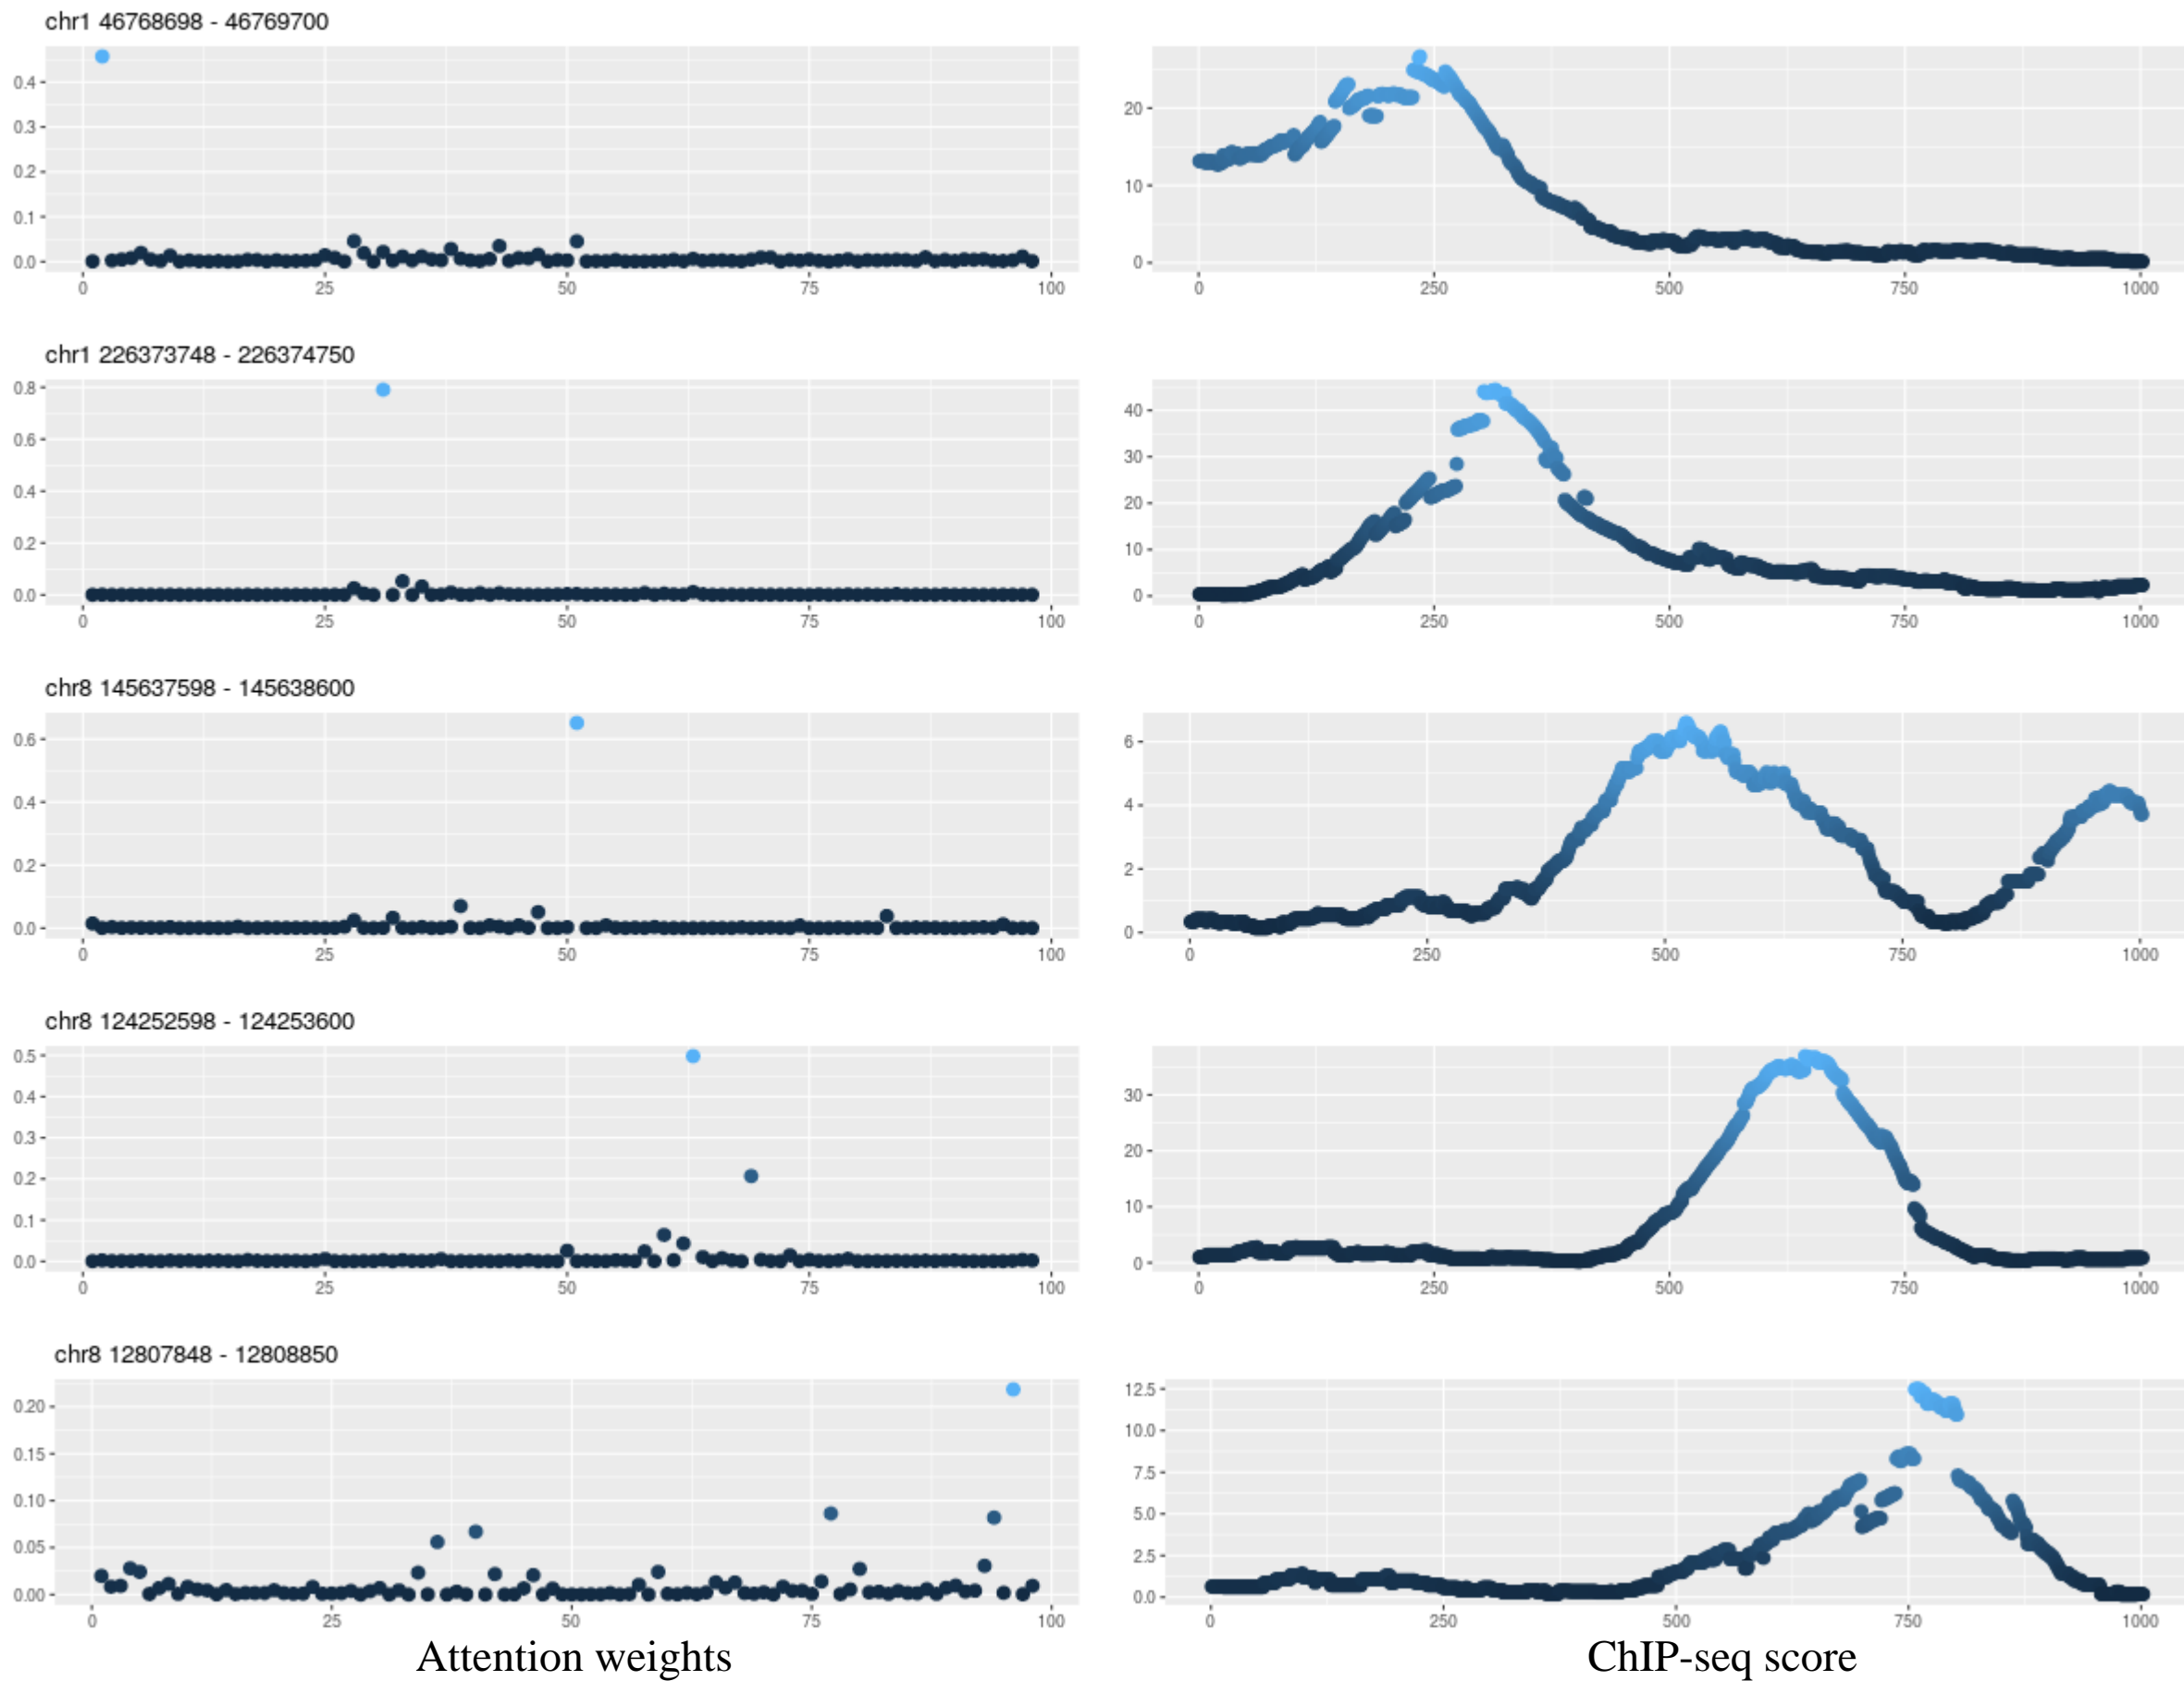



# Single attention module

## HNF4A/liver

chr8 23103248 - 23104250

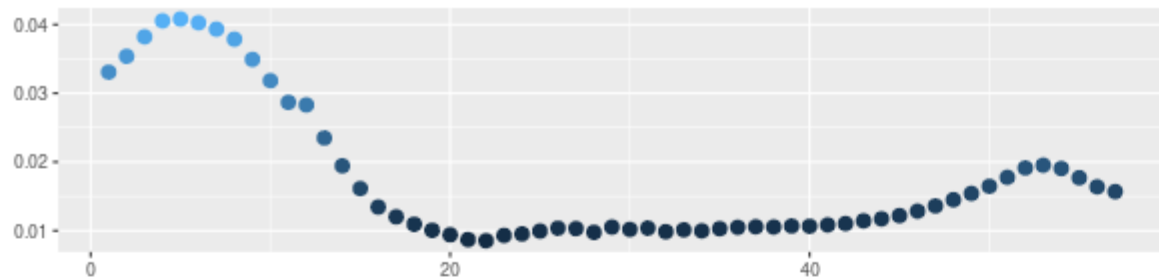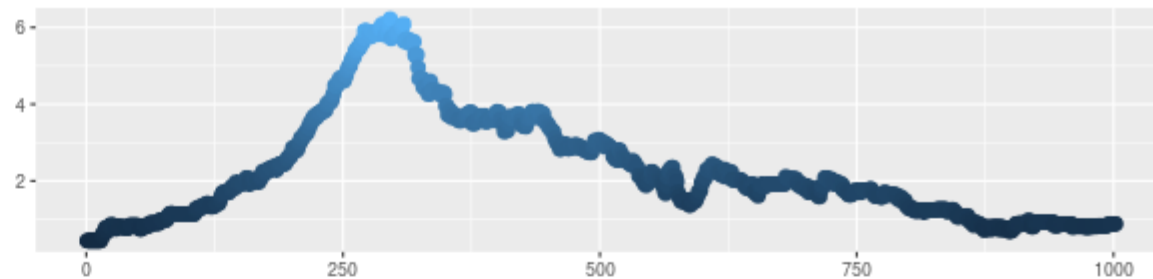

chr1 187724048 - 187725050

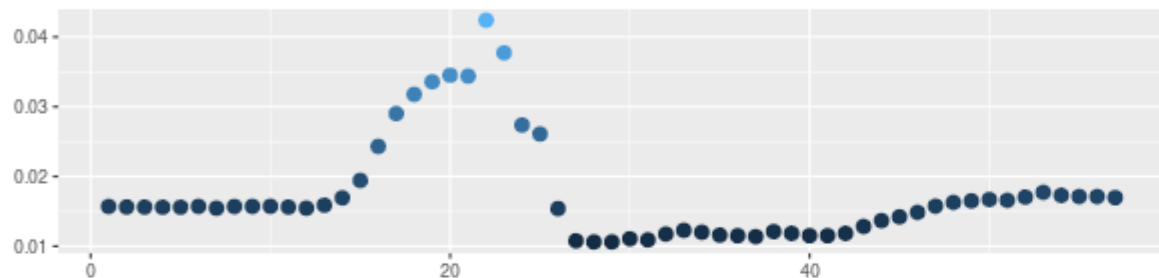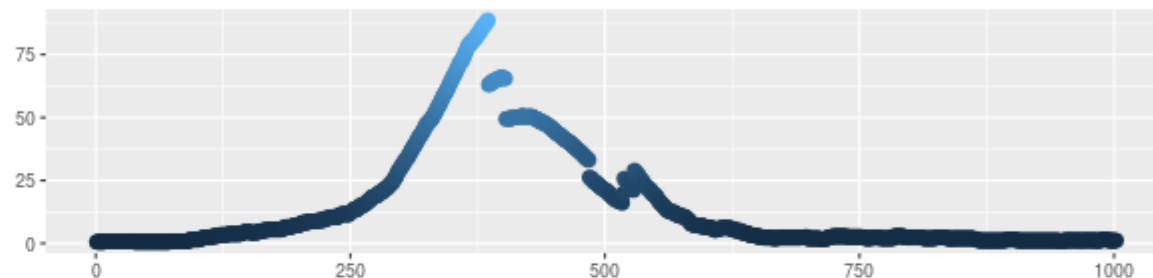

chr1 150382548 - 150383550

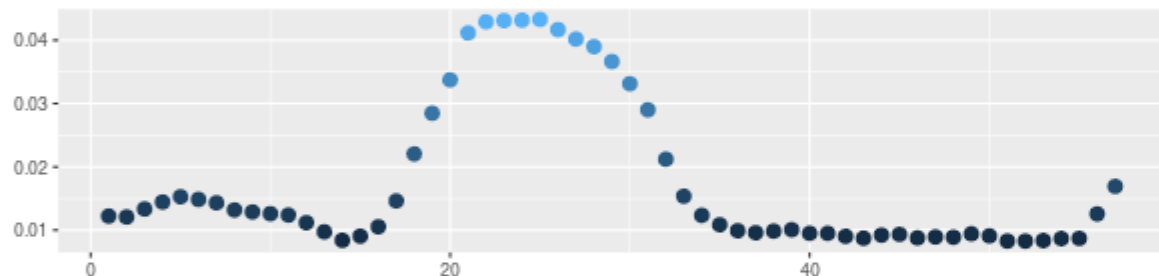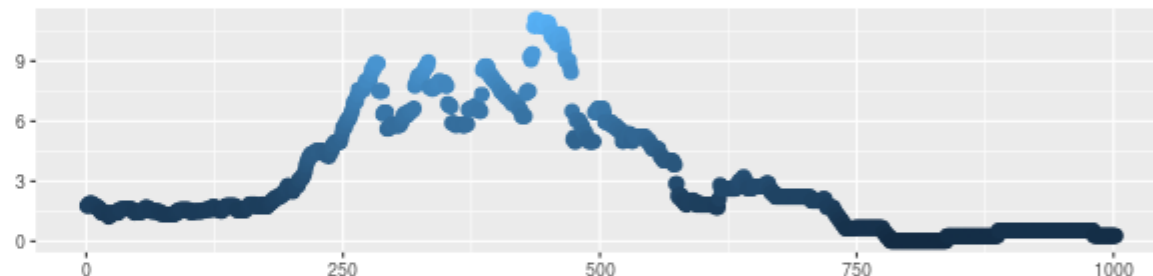

chr1 227281448 - 227282450

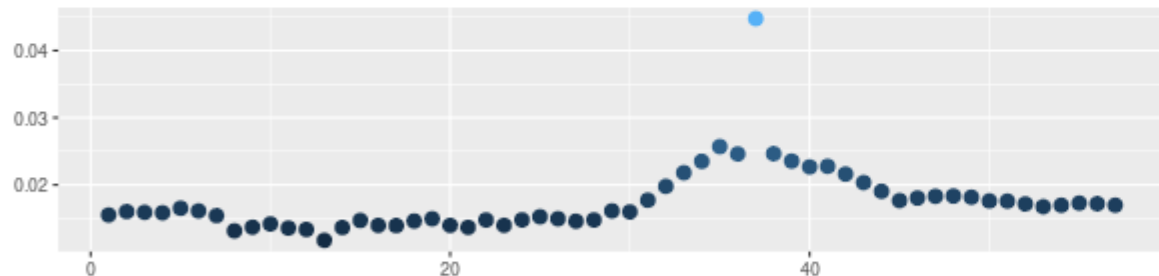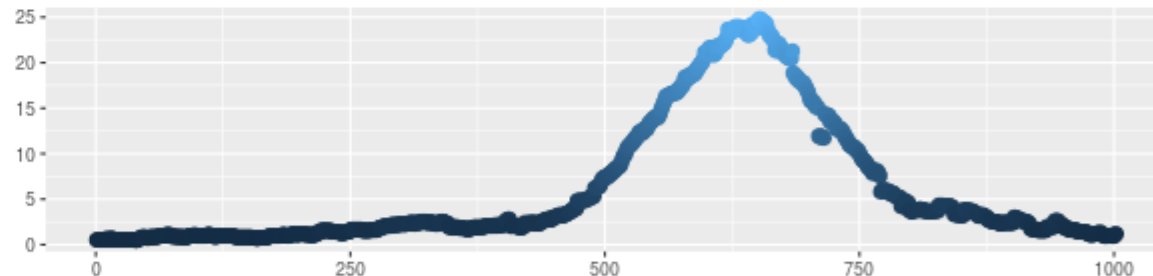

chr1 118471248 - 118472250

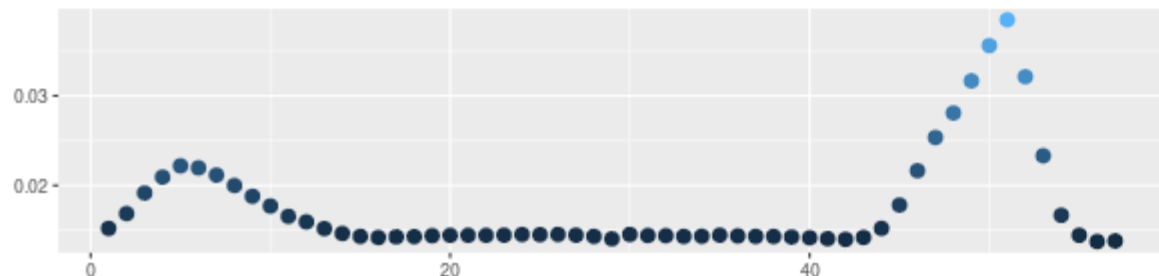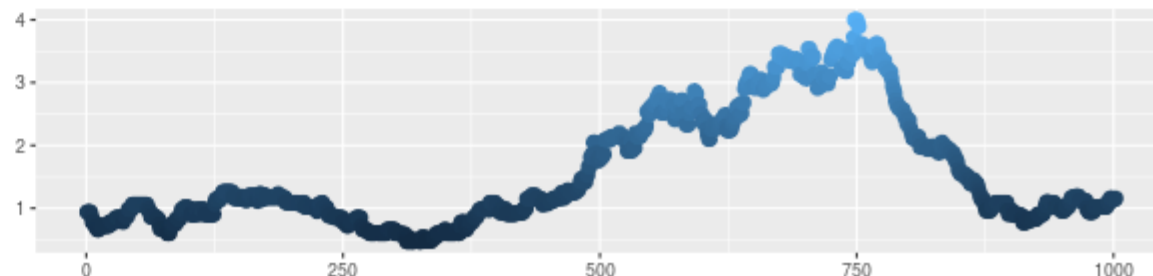

Attention weights

ChIP-seq score

# Single attention module

## JUND/liver

chr1 227052748 - 227053750

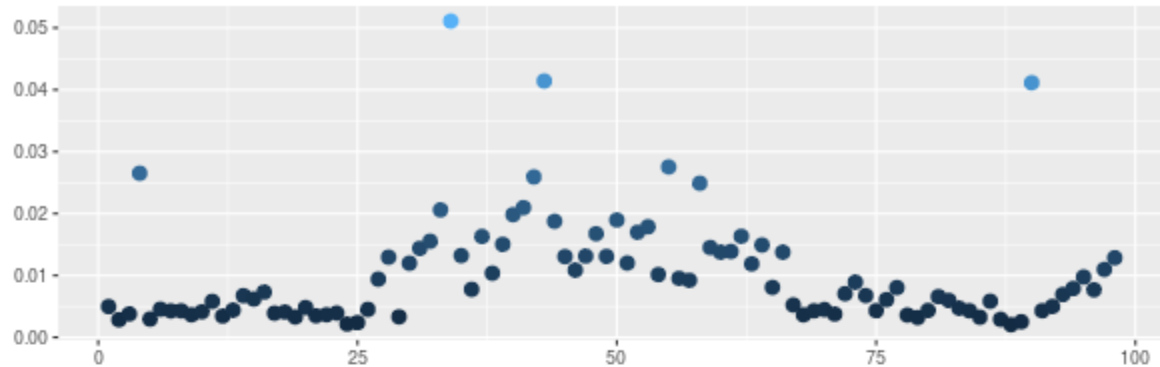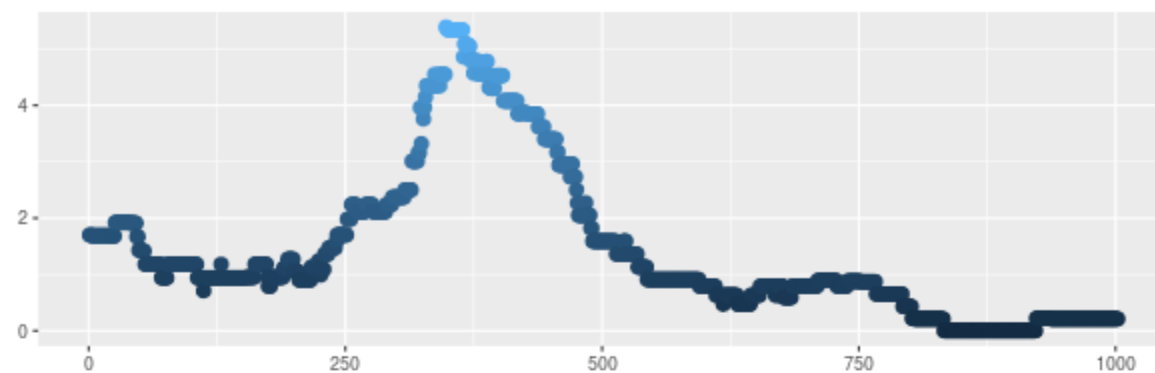

chr1 19528148 - 19529150

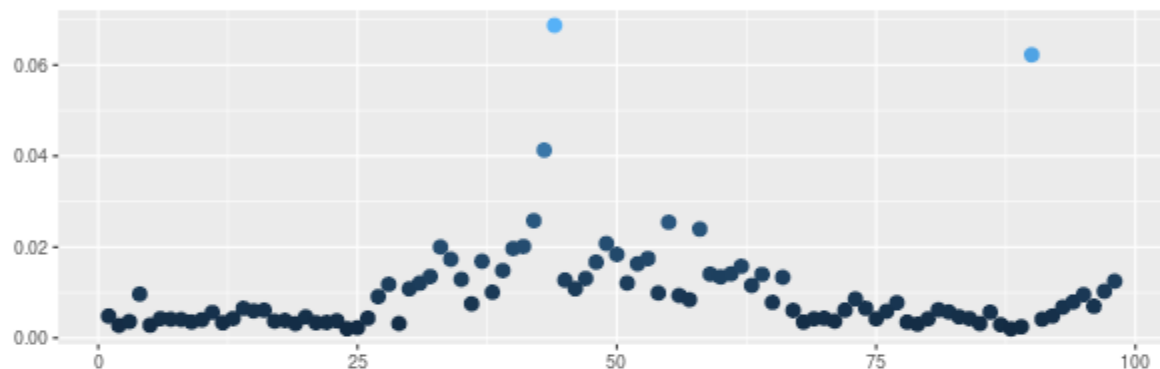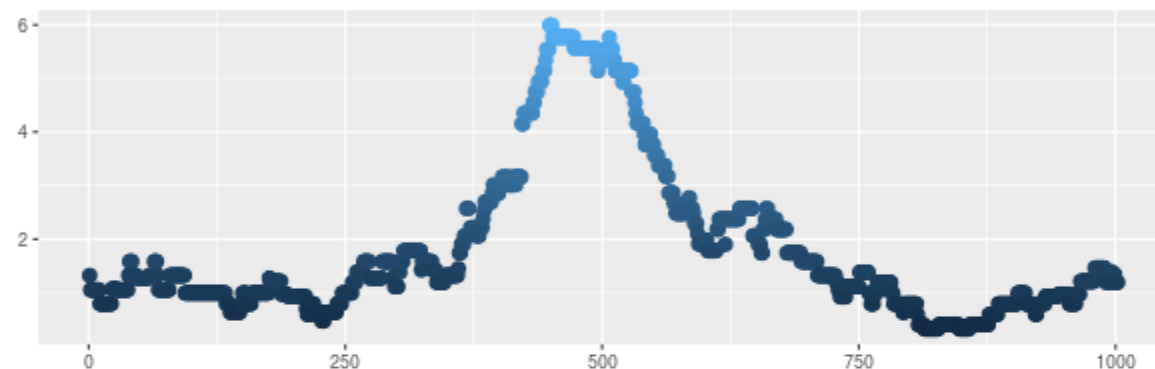

chr21 44153548 - 44154550

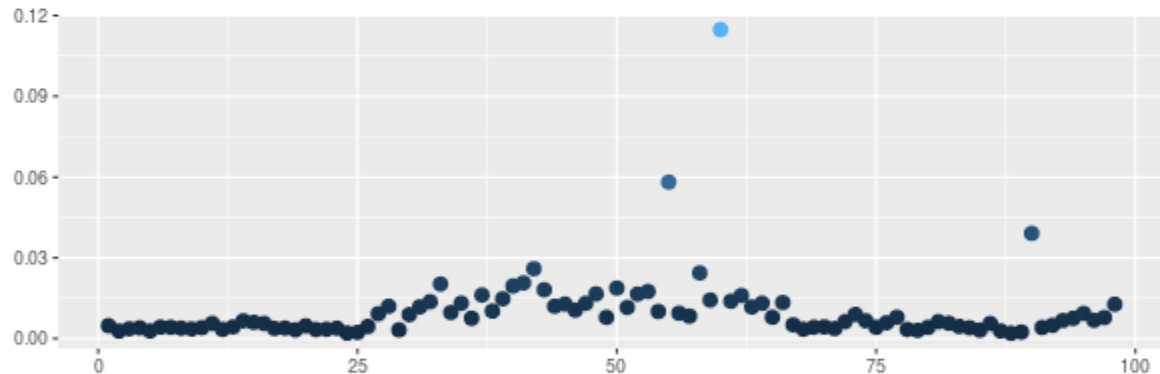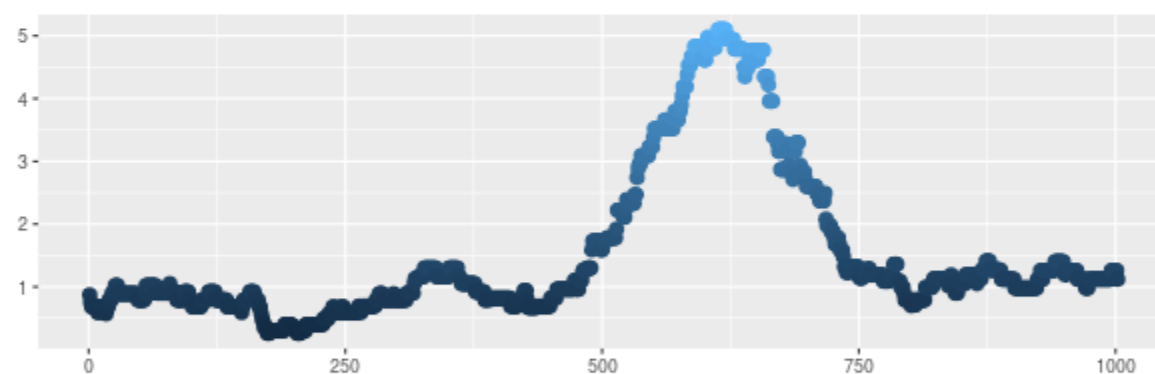

chr8 67683248 - 67684250

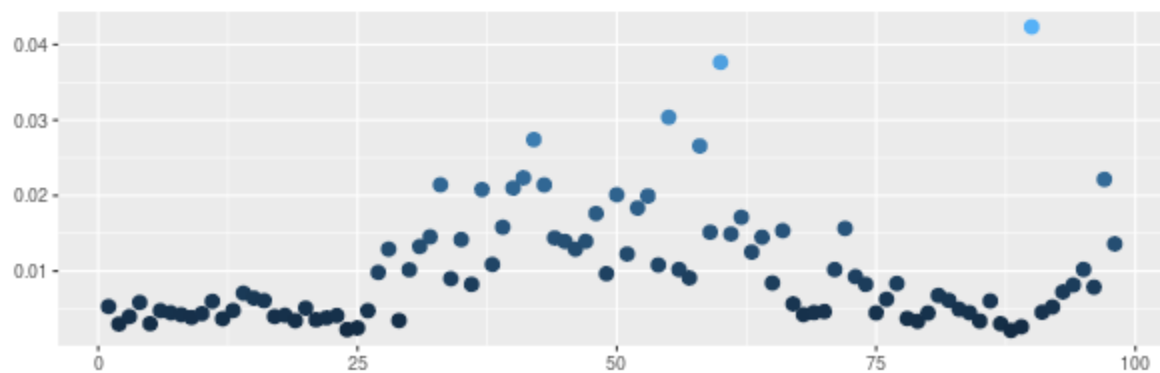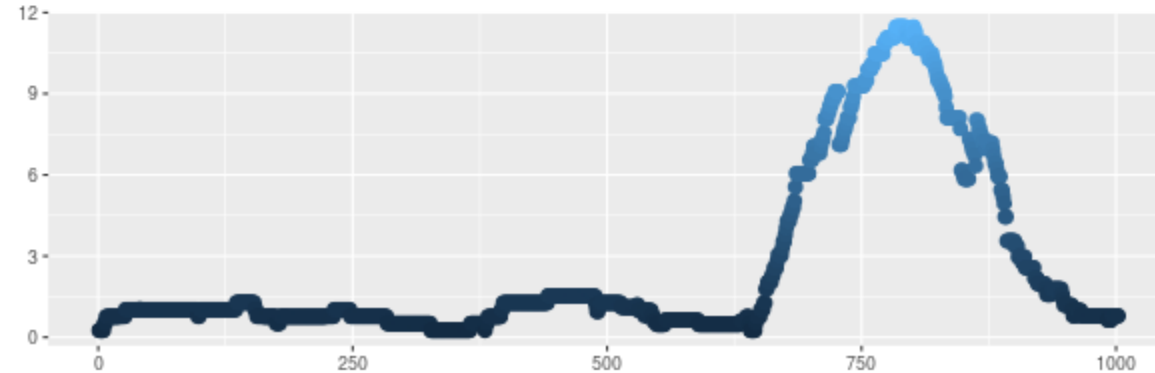

Attention weights

CHIP-seq score

# Single attention module

## MAX/liver

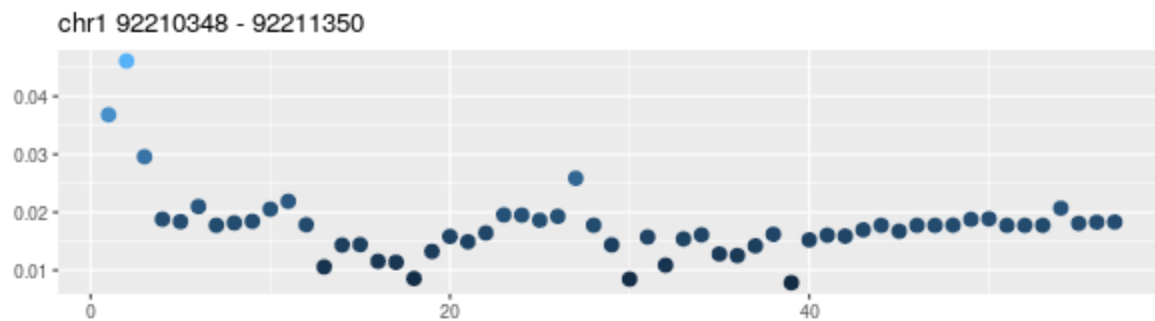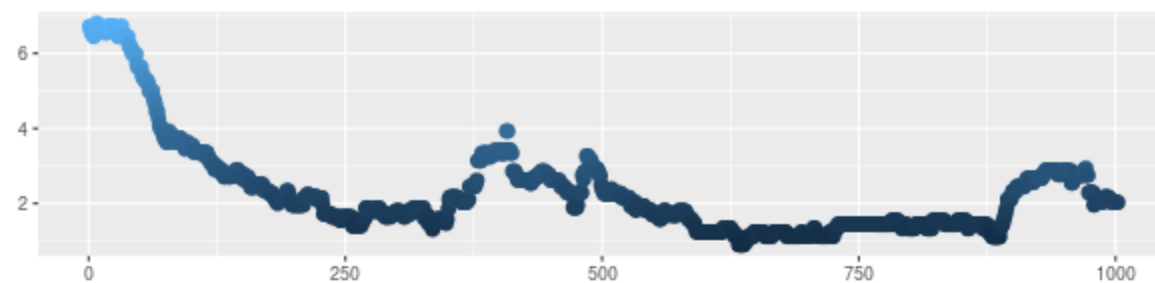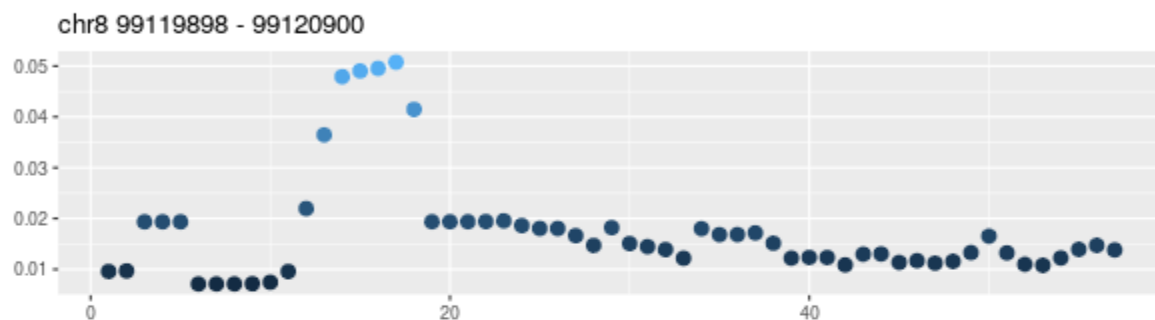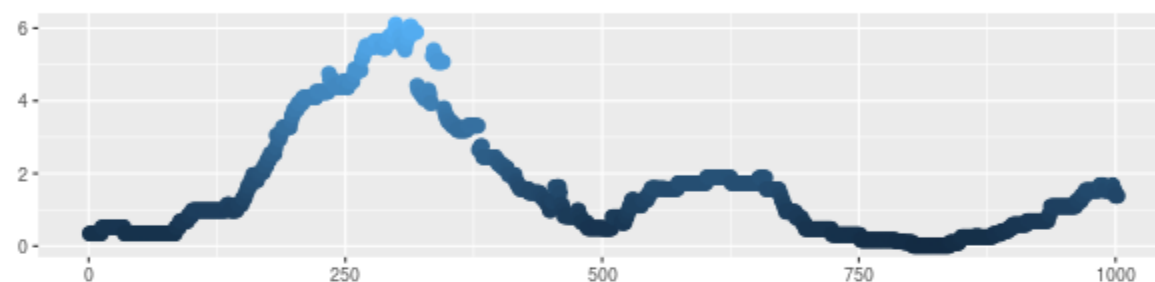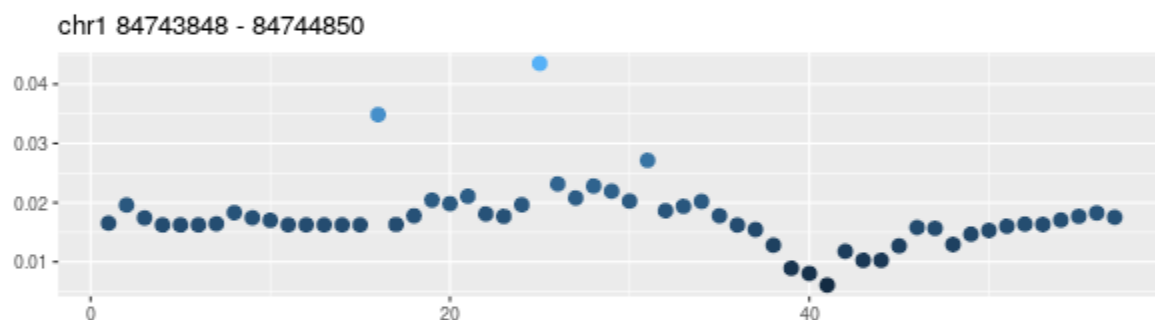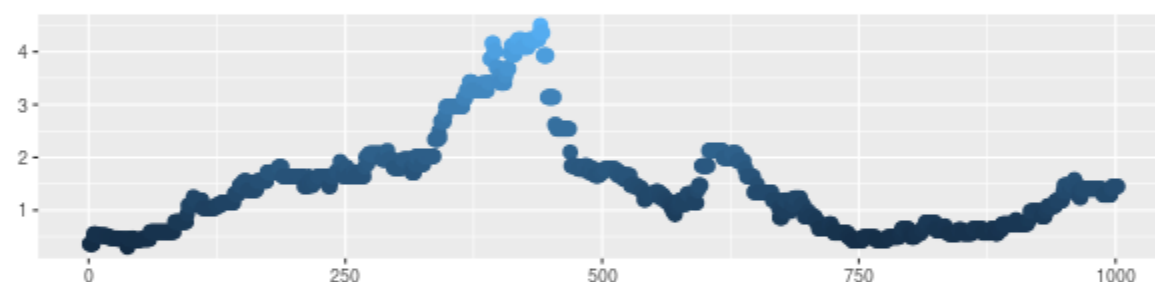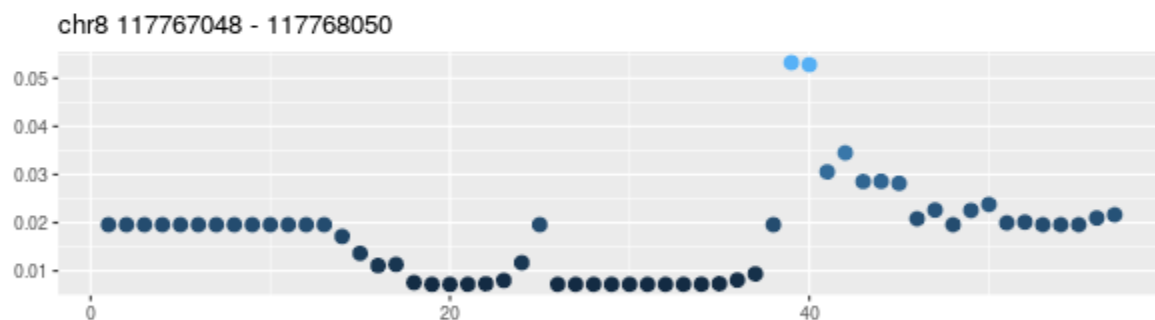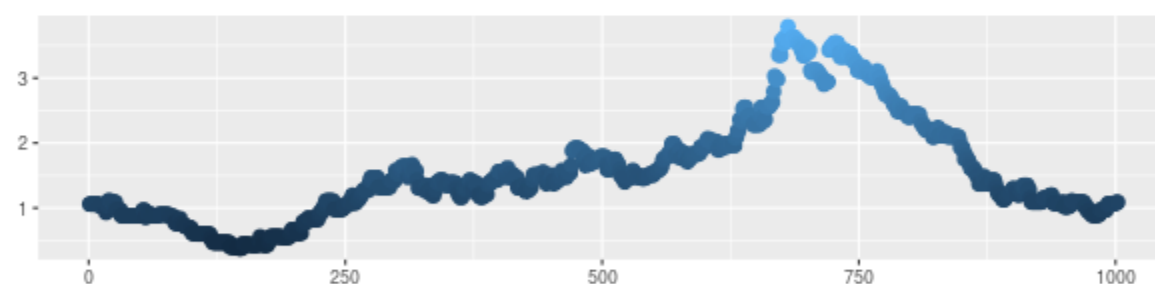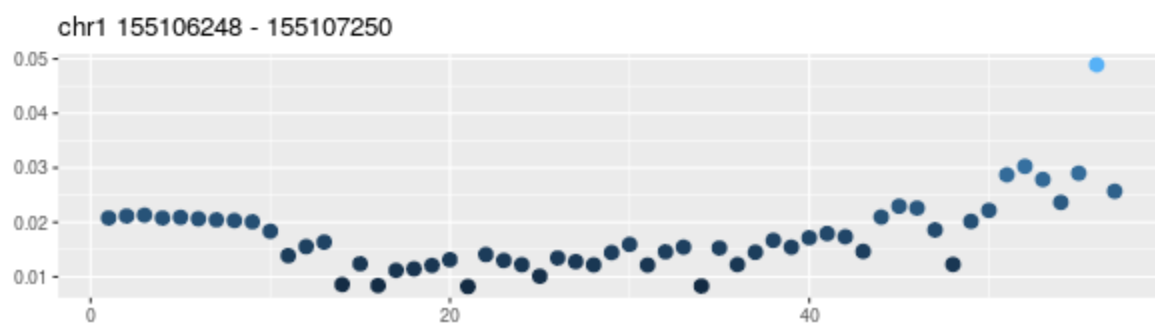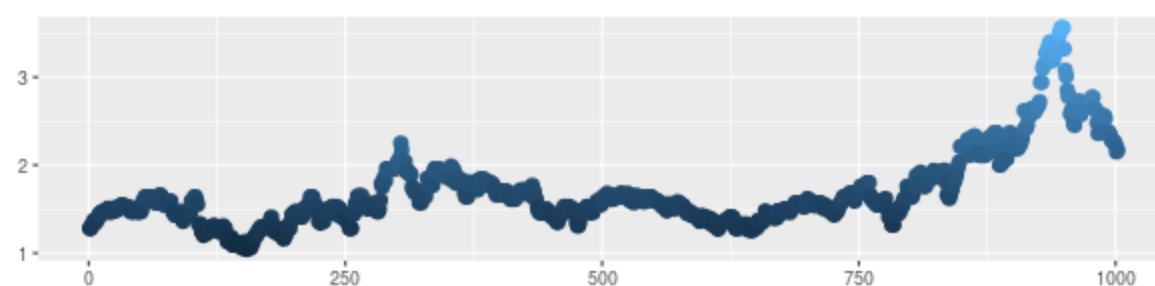

Attention weights

CHIP-seq score

# Single attention module

NANOG/induced pluripotent stem cell

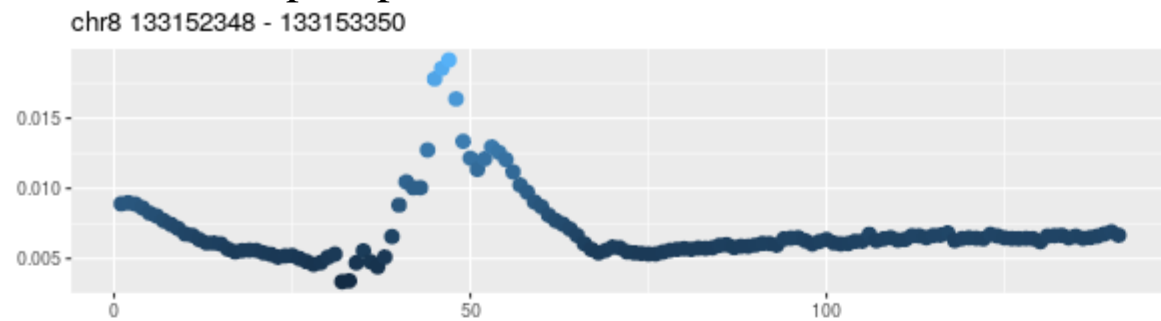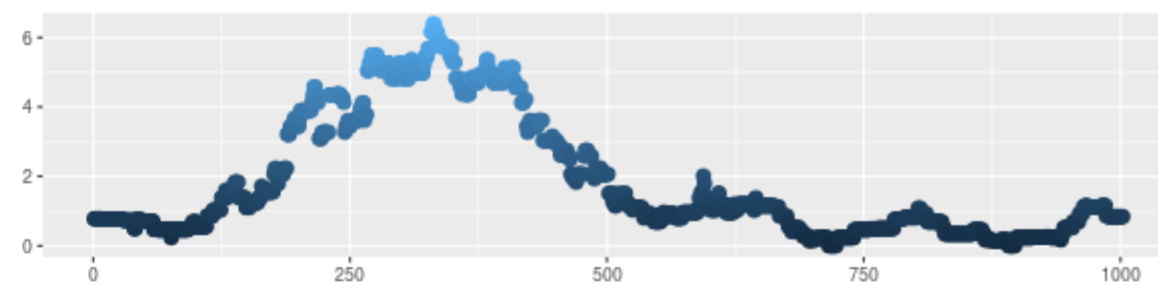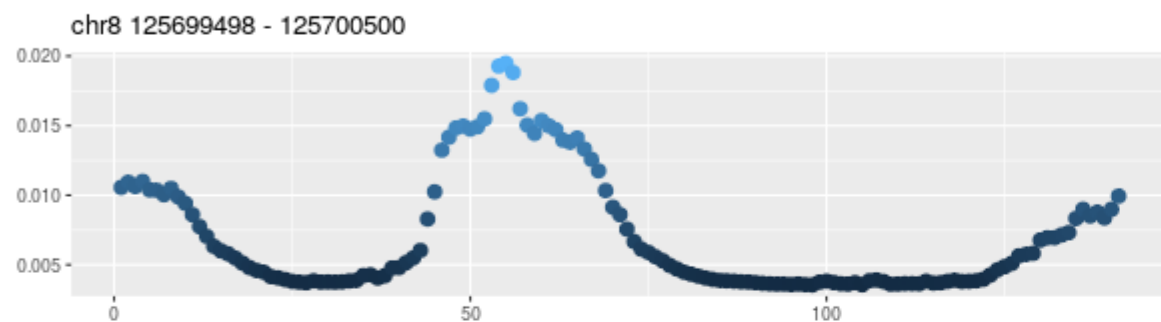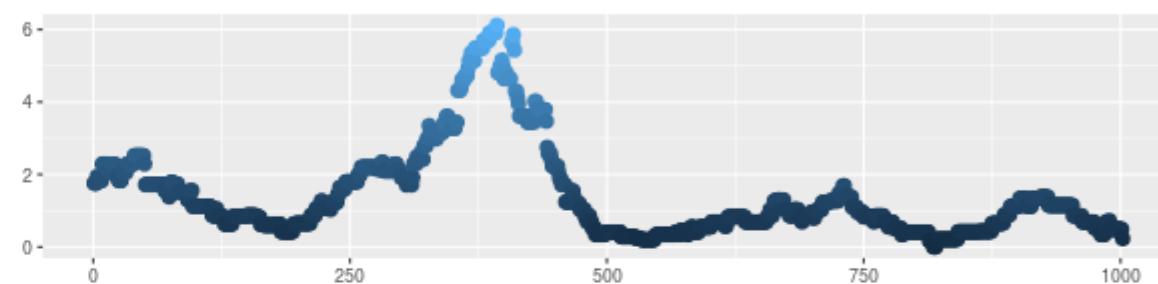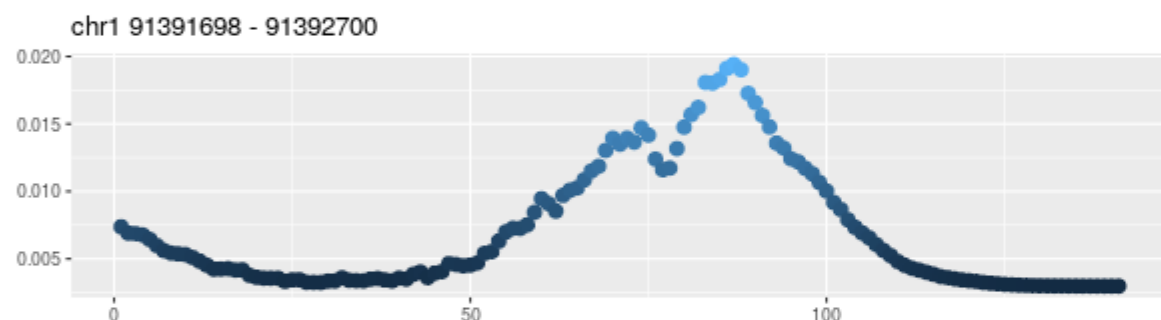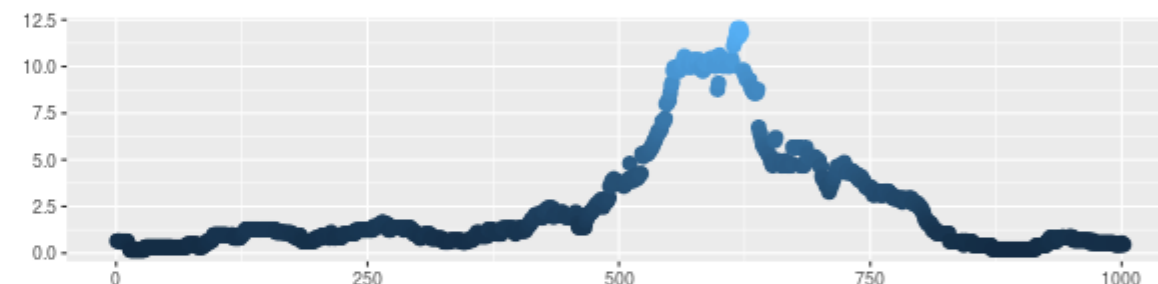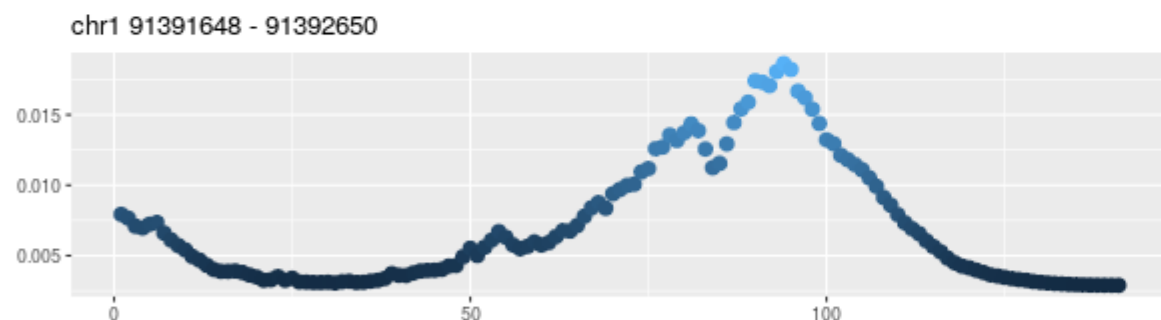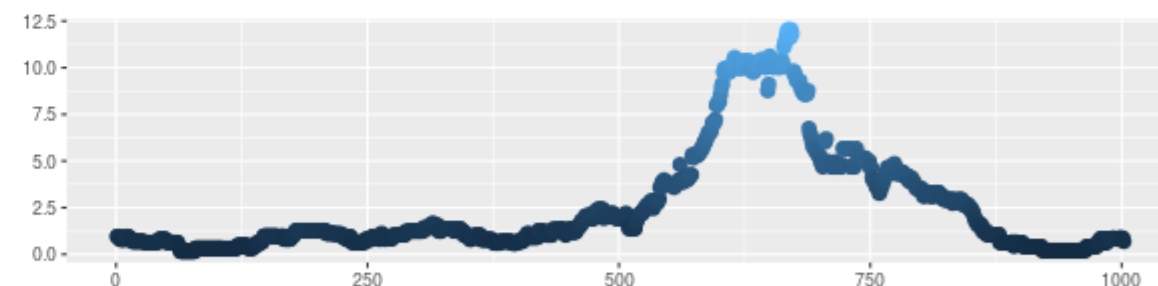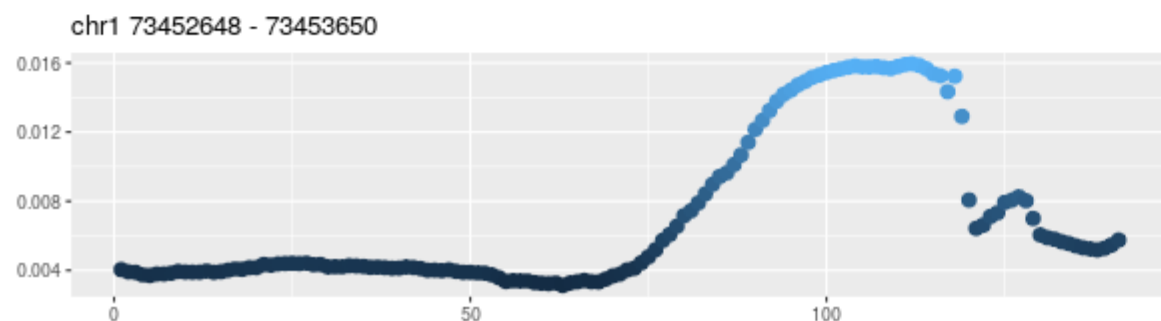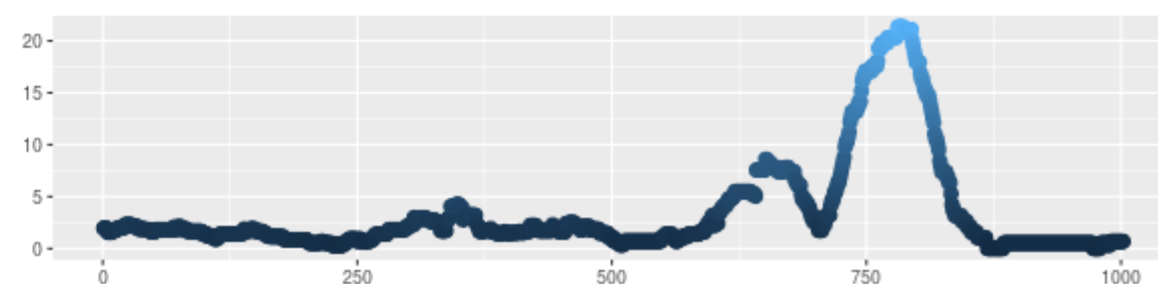

Attention weights

ChIP-seq score

# Single attention module

REST/liver

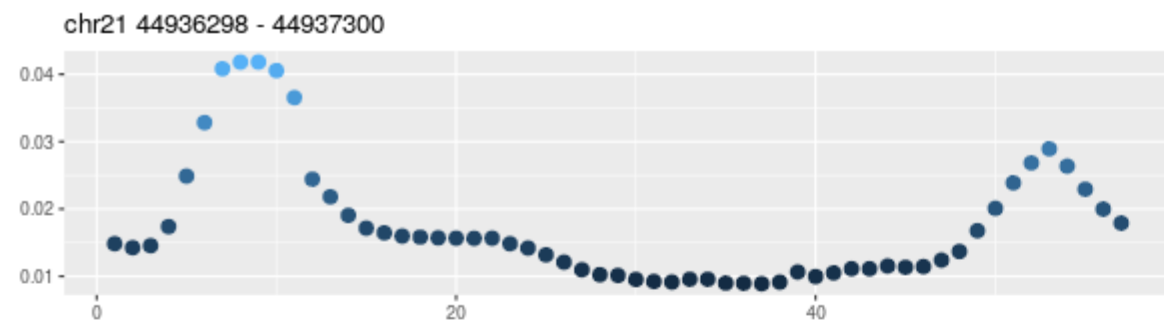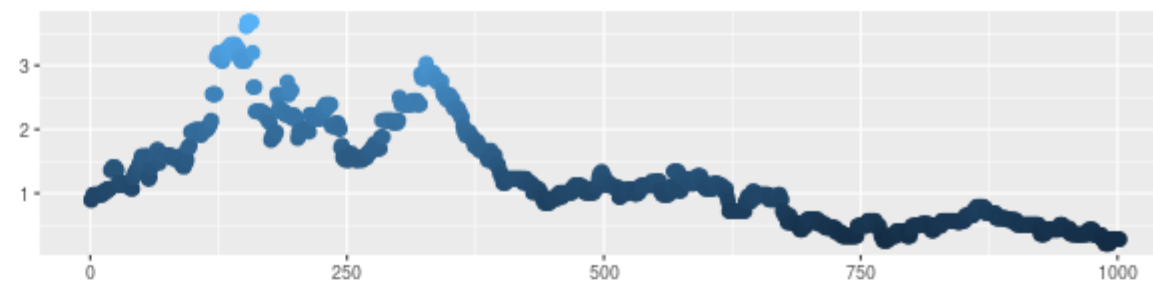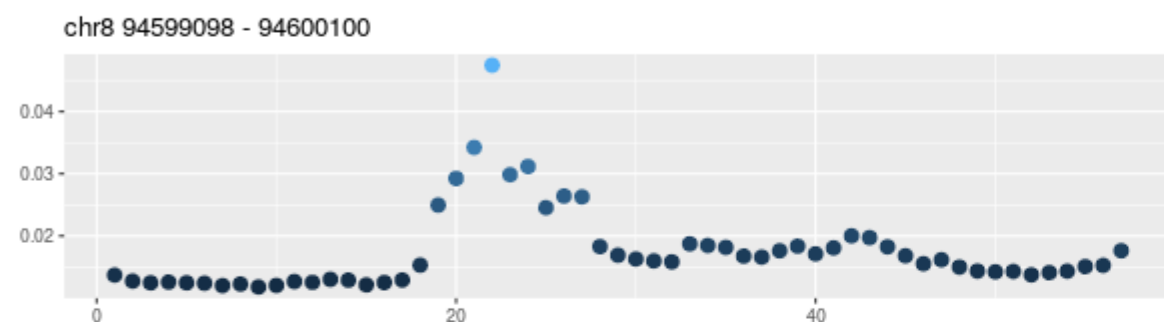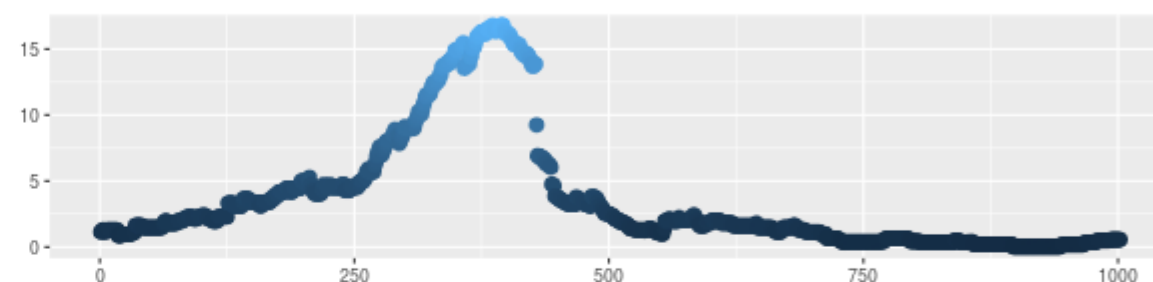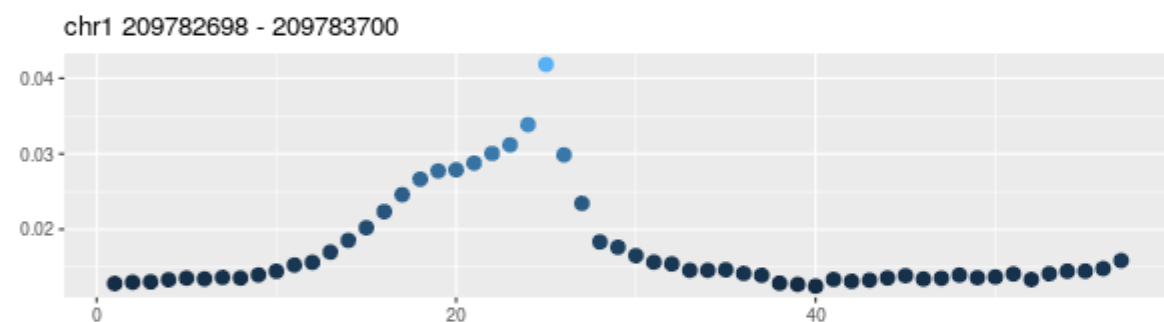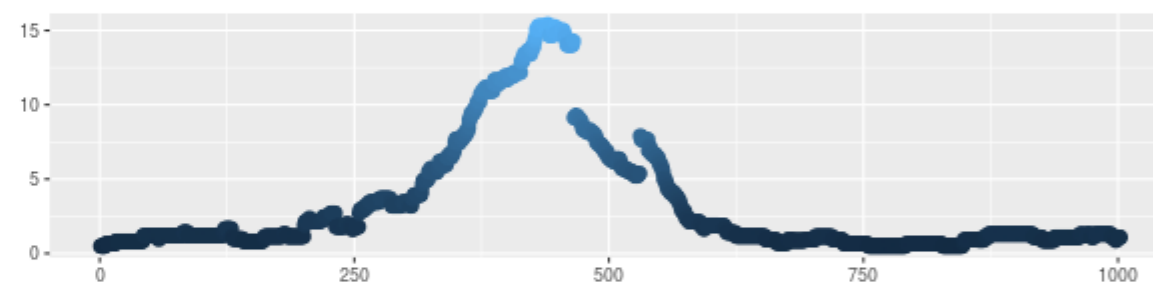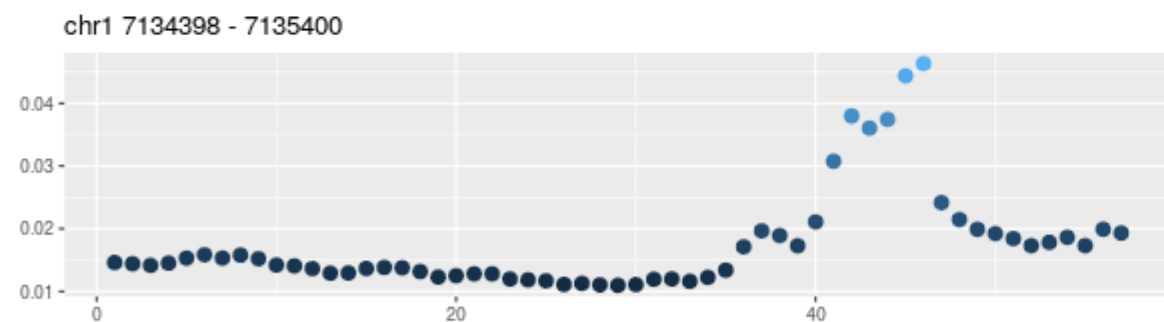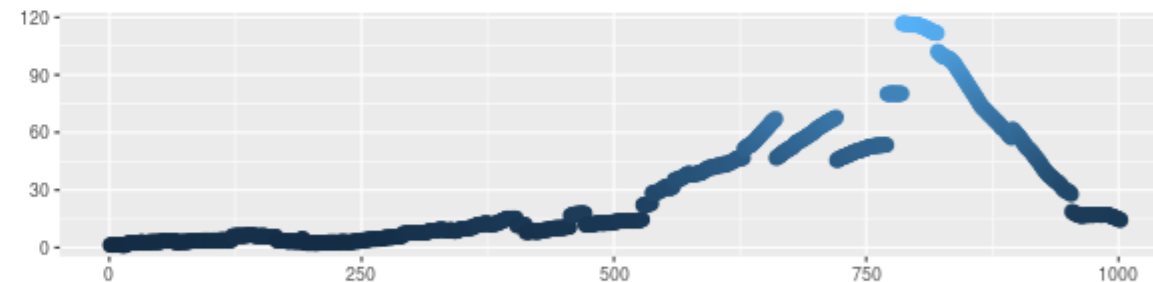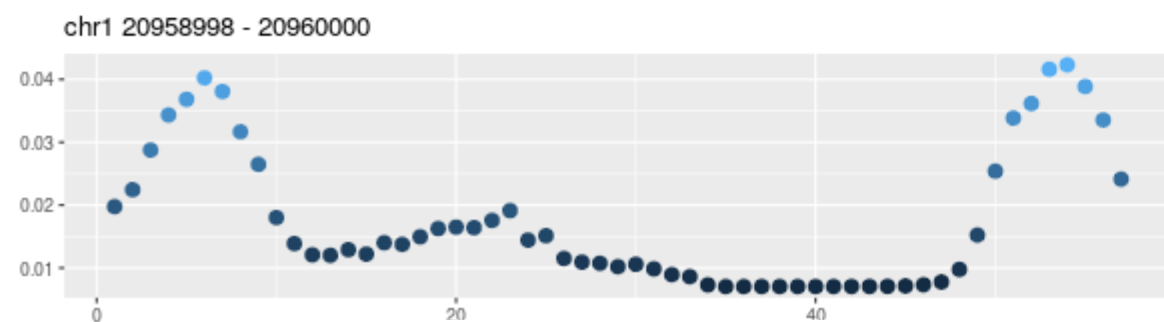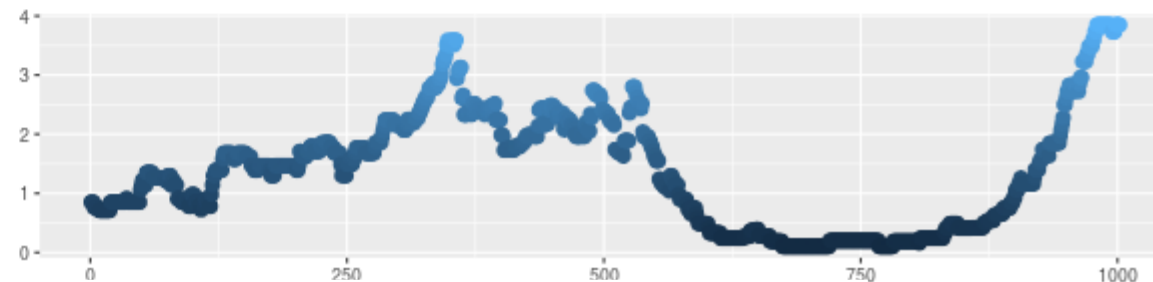

# Single attention module

TAF1/liver

chr1 145476748 - 145477750

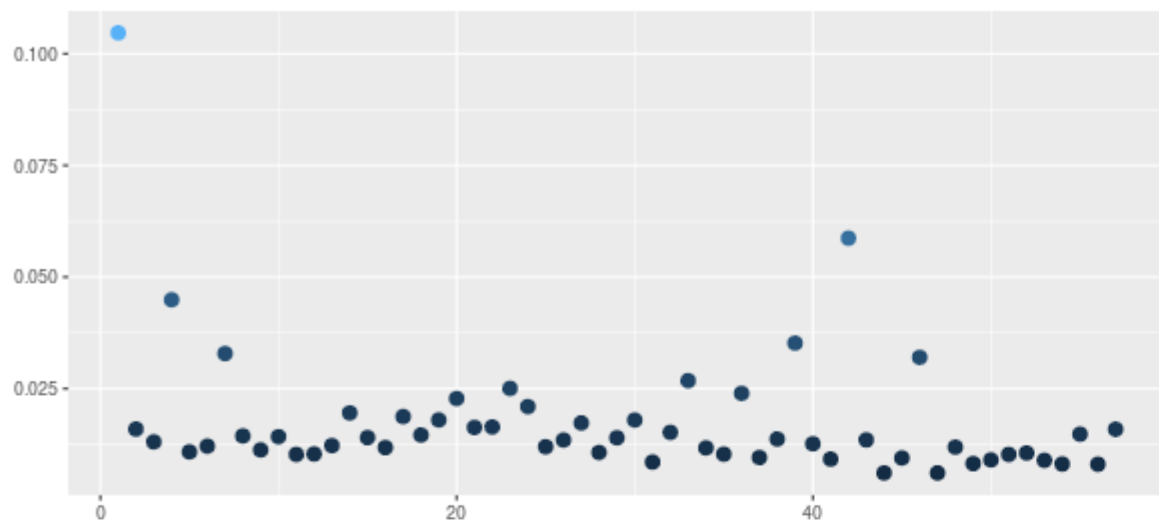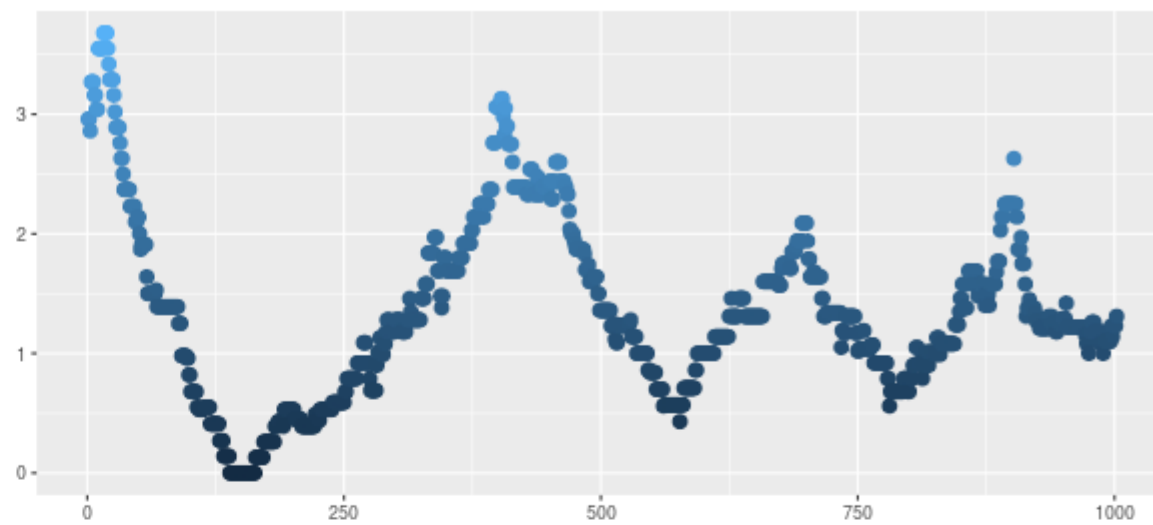

chr1 115322348 - 115323350

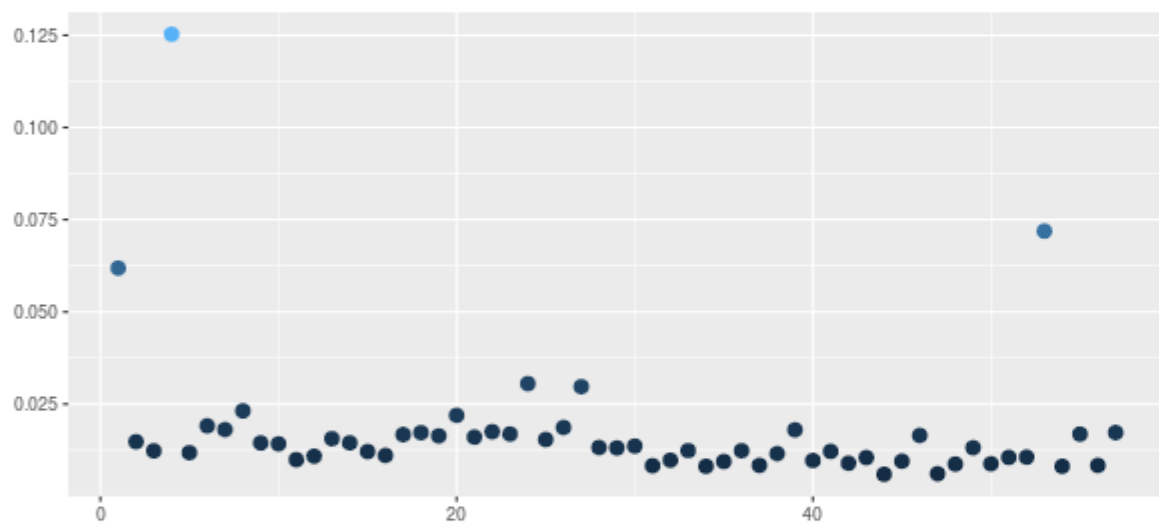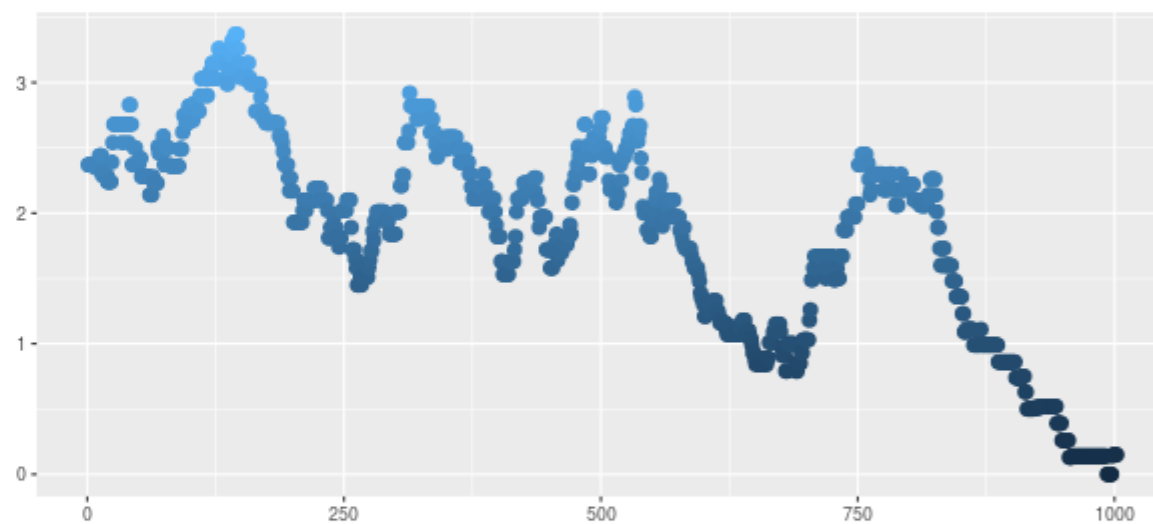

chr1 205179748 - 205180750

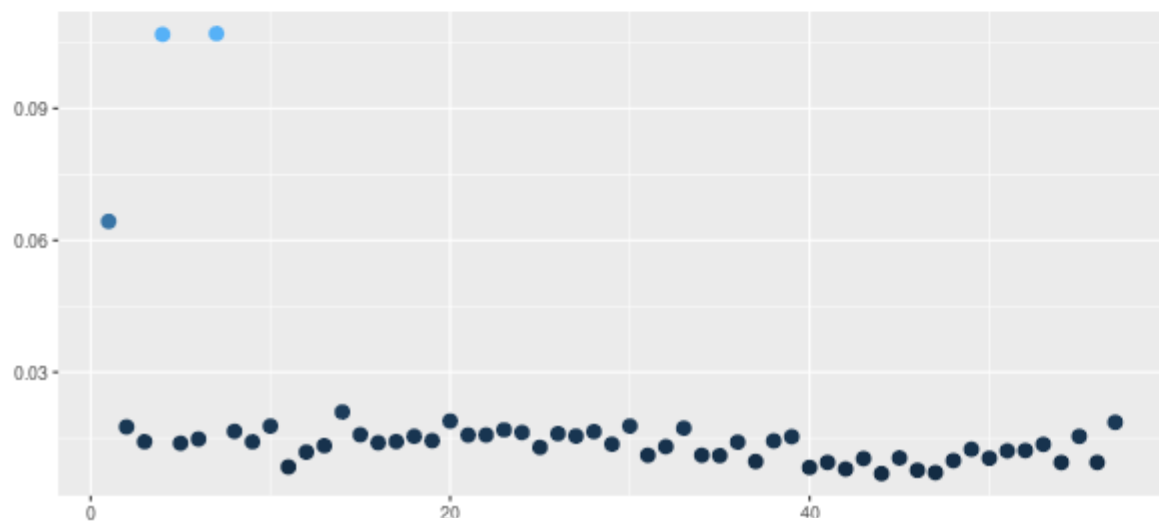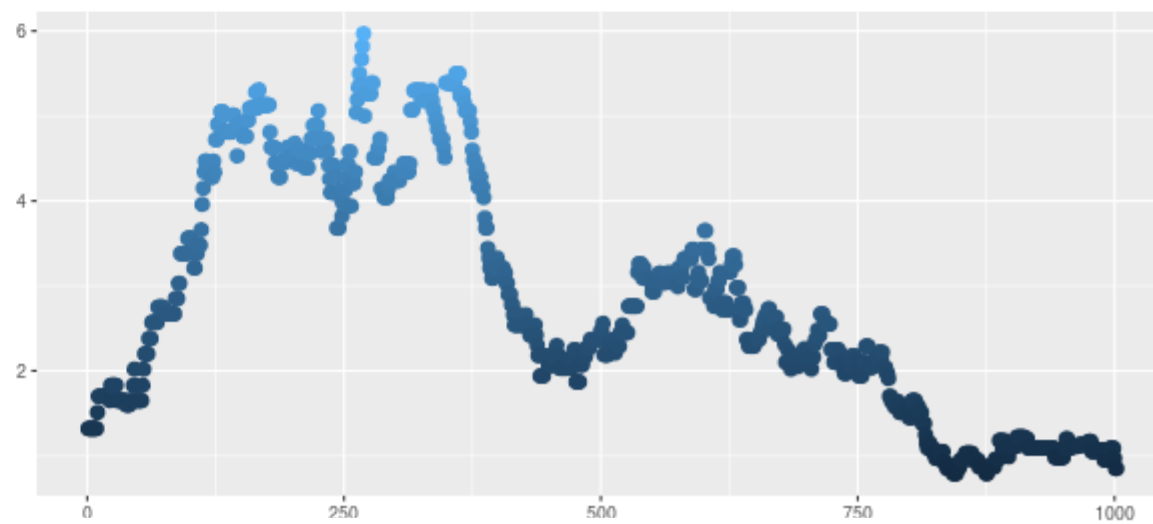

Attention weights

CHIP-seq score

# Pairwise attention module

## CTCF/induced pluripotent stem cell

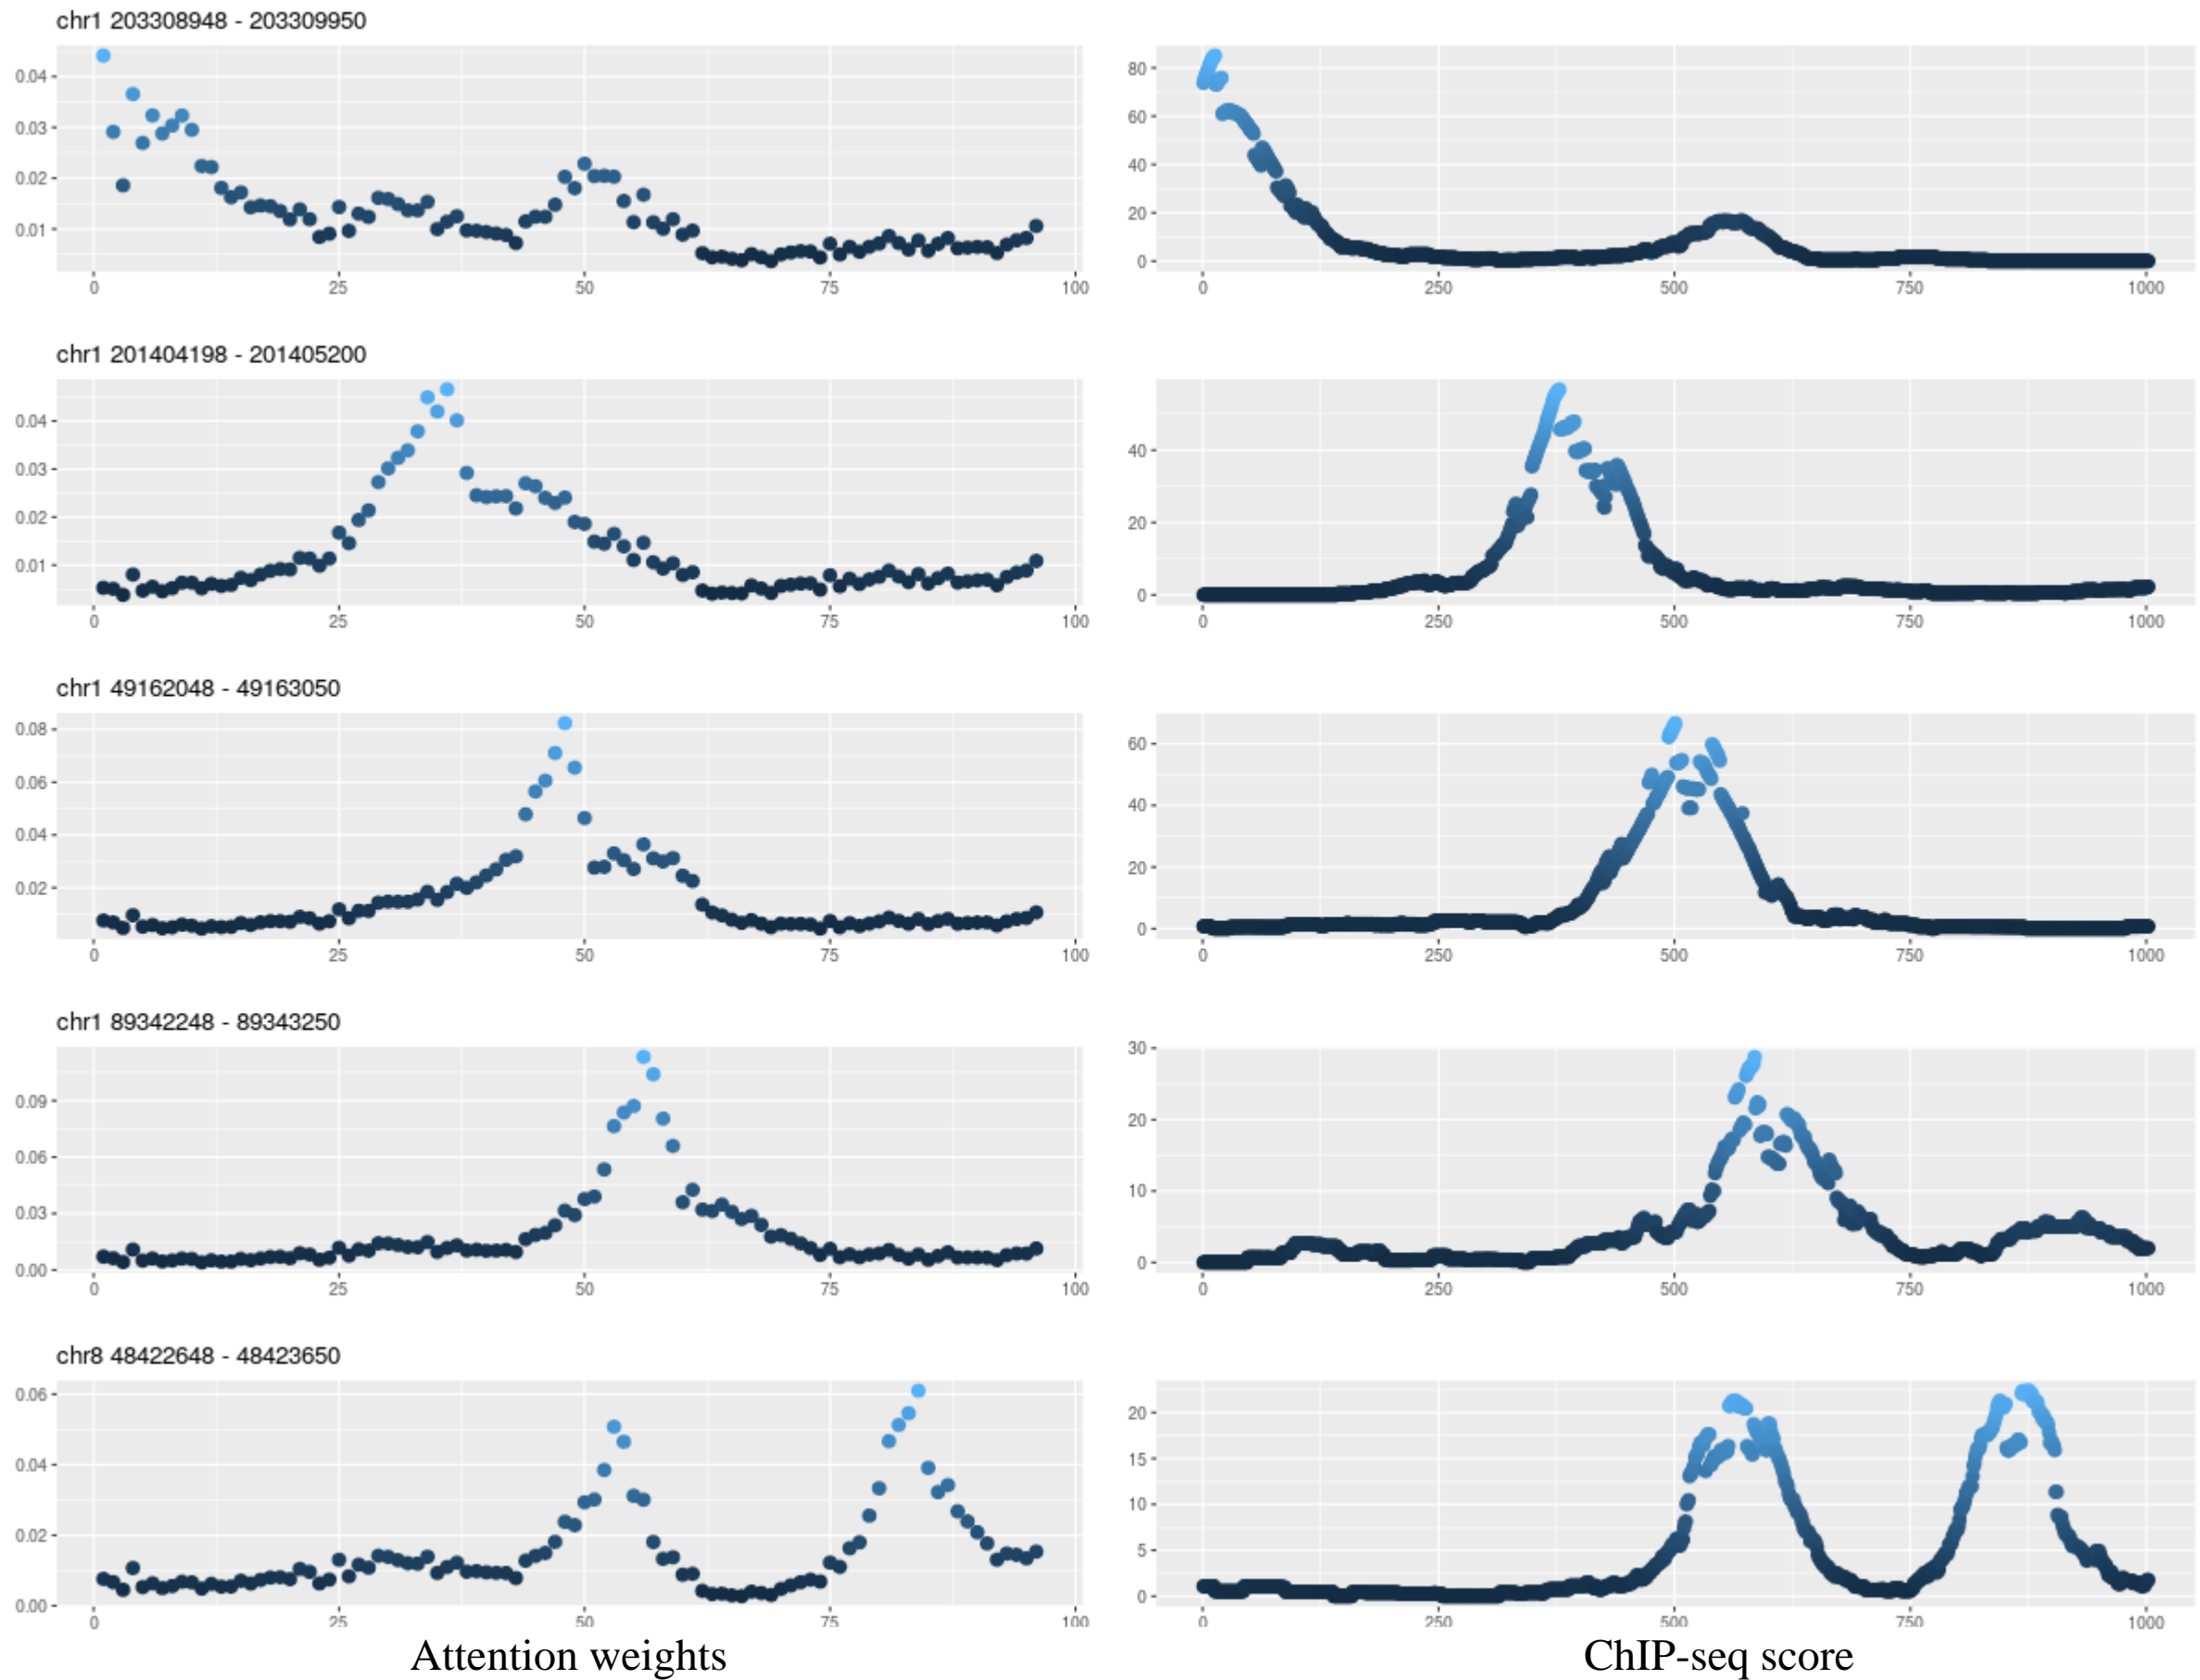

# Pairwise attention module

CTCF/PC-3

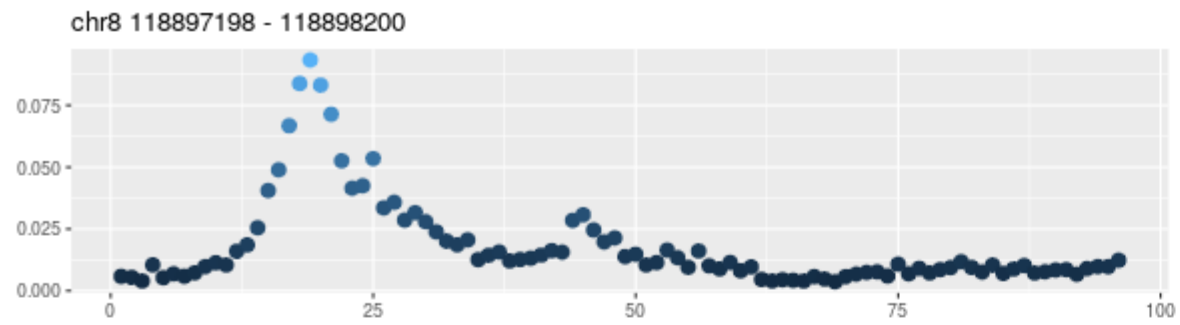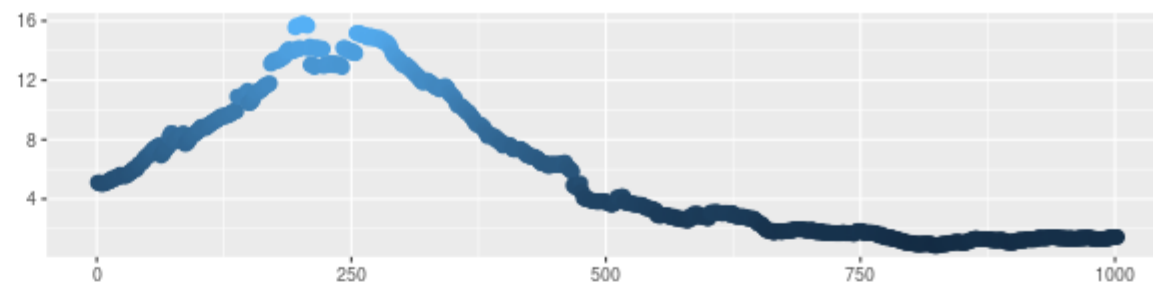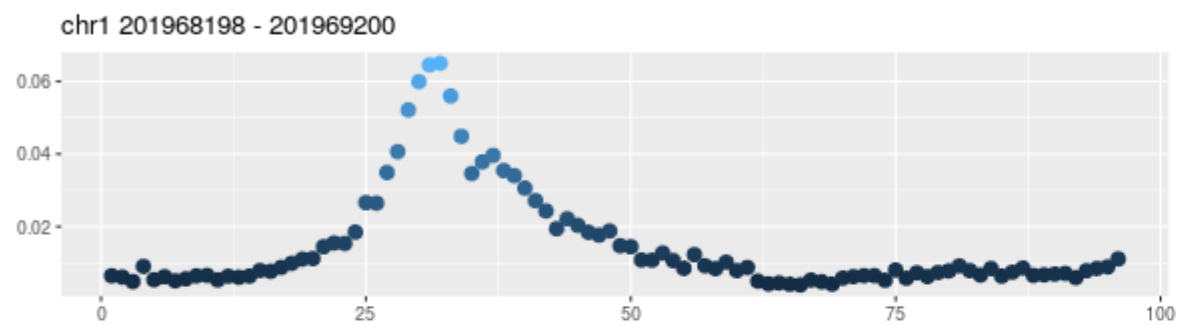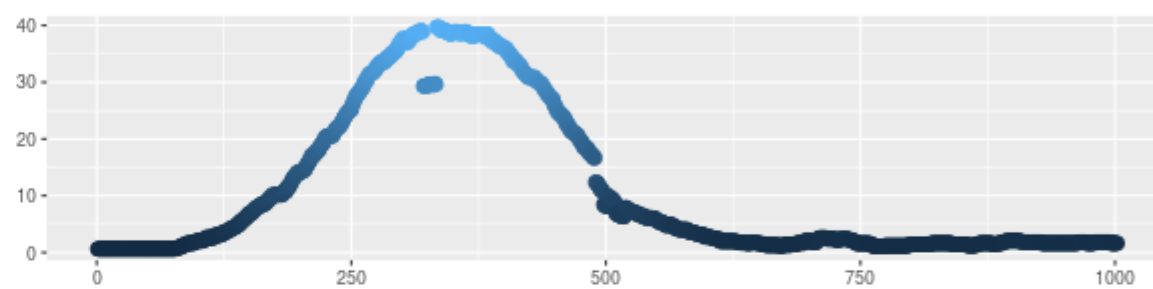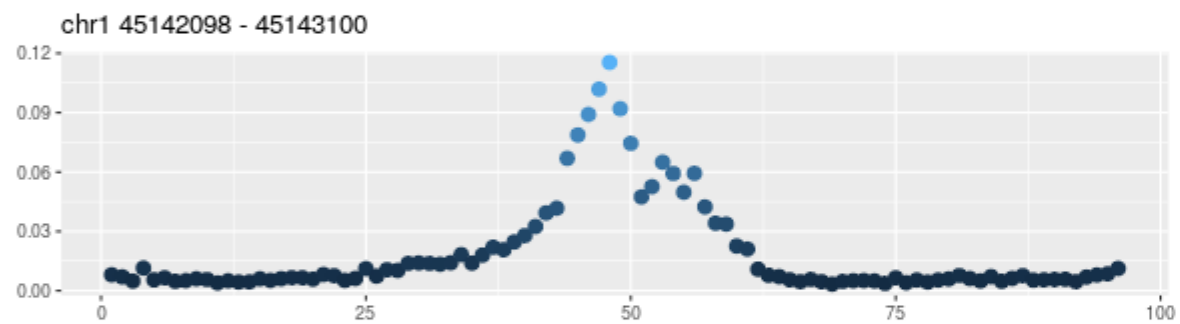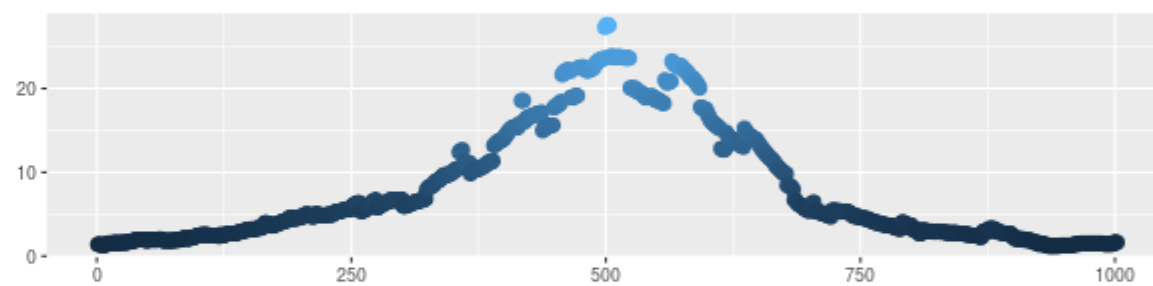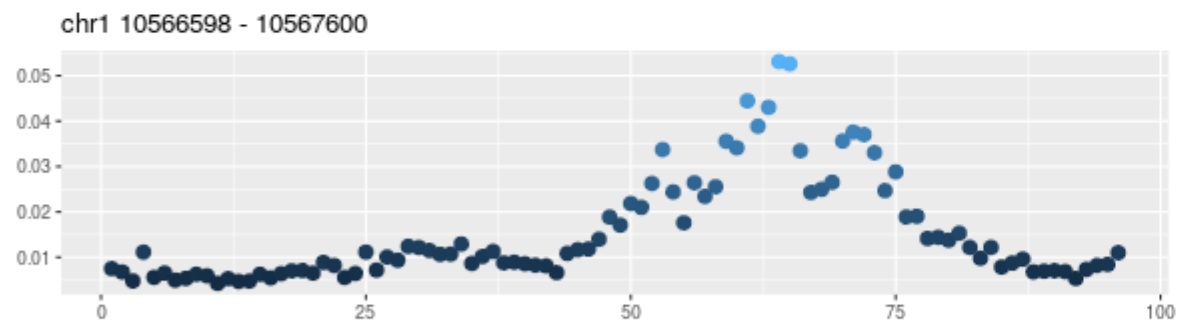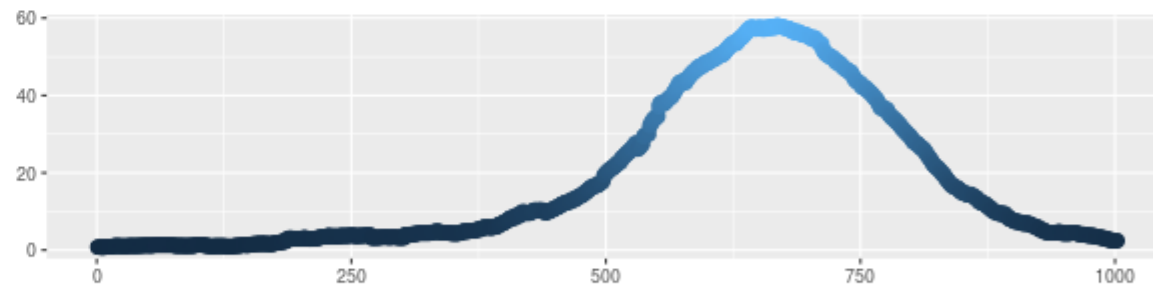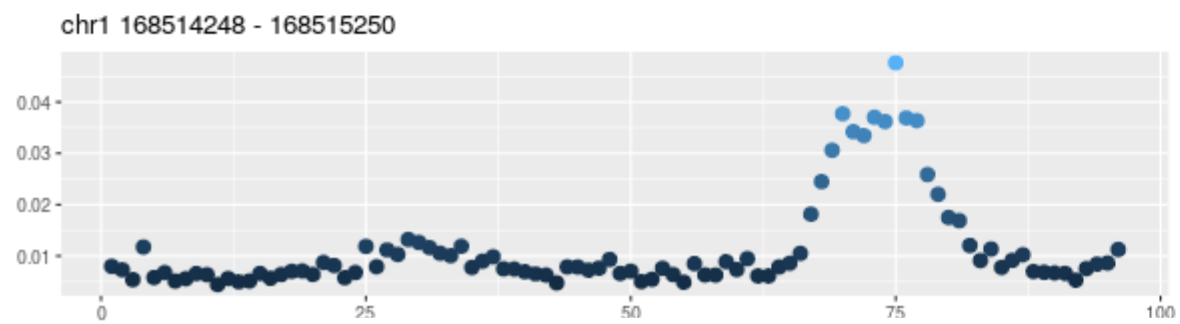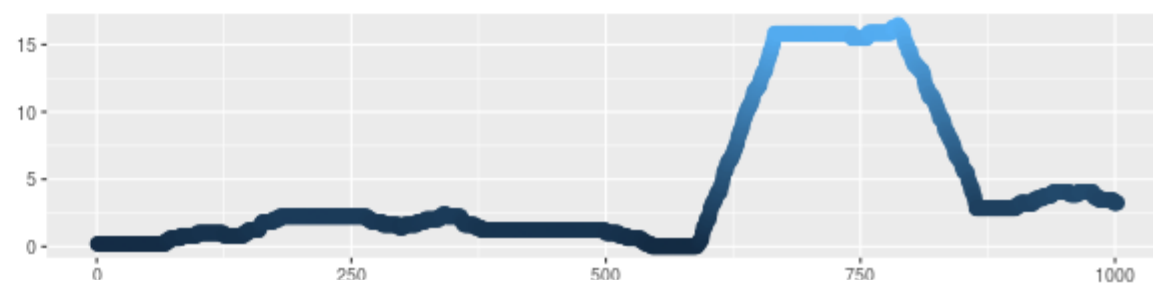

Attention weights

ChIP-seq score



# Pairwise attention module

E2F1/K562

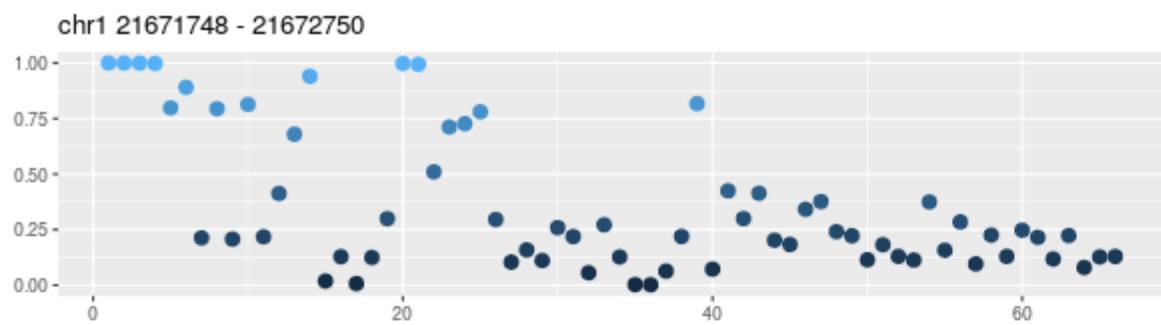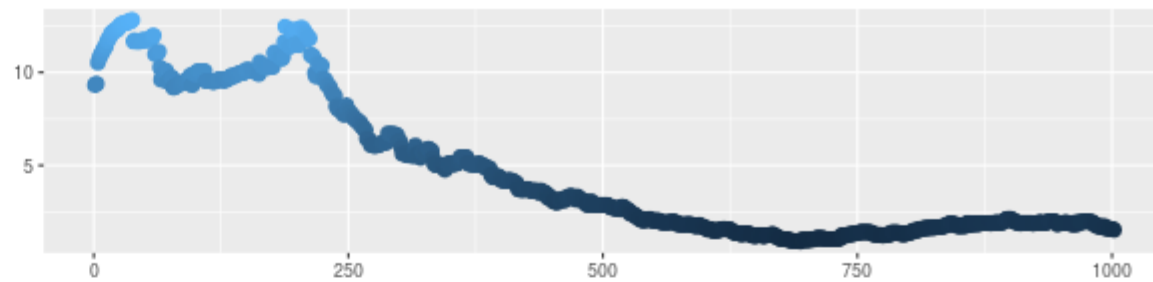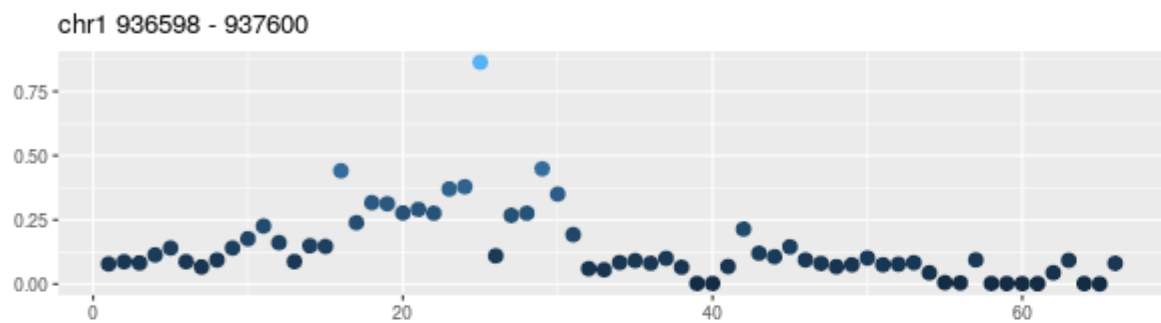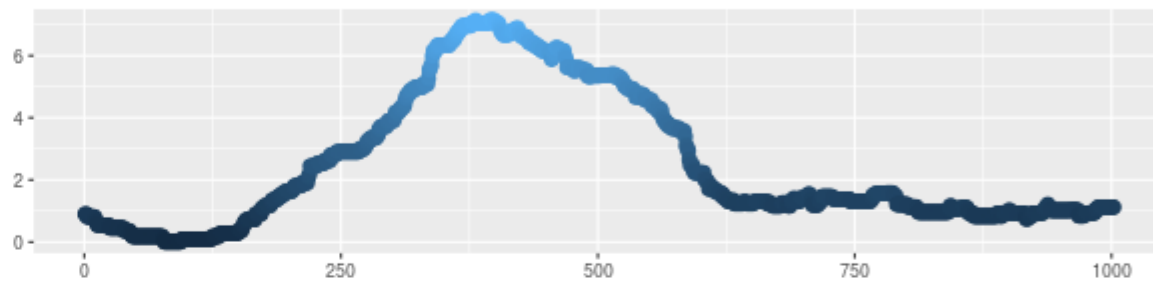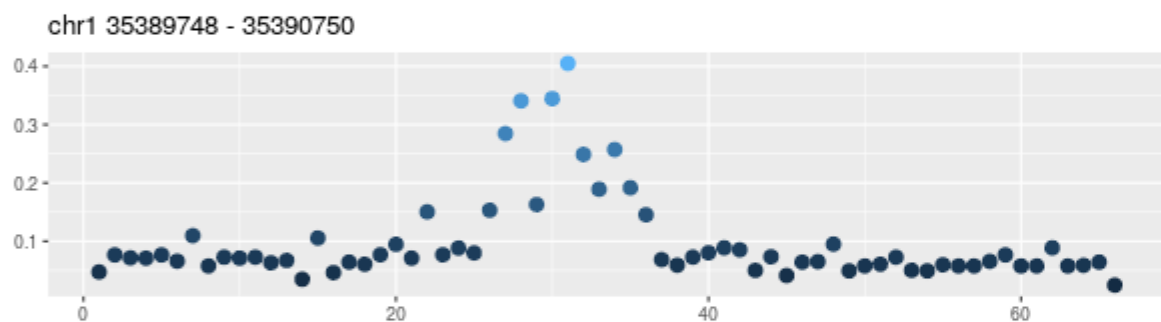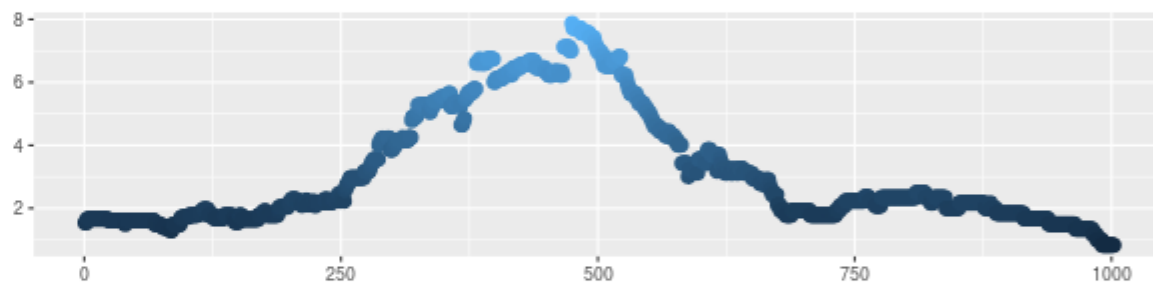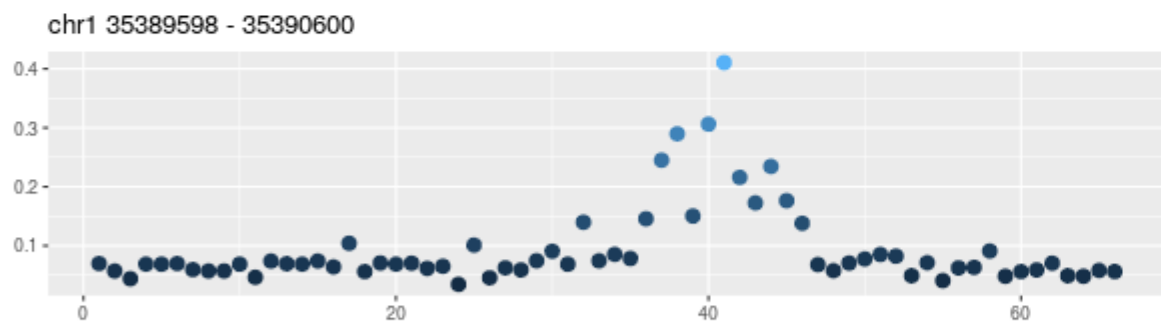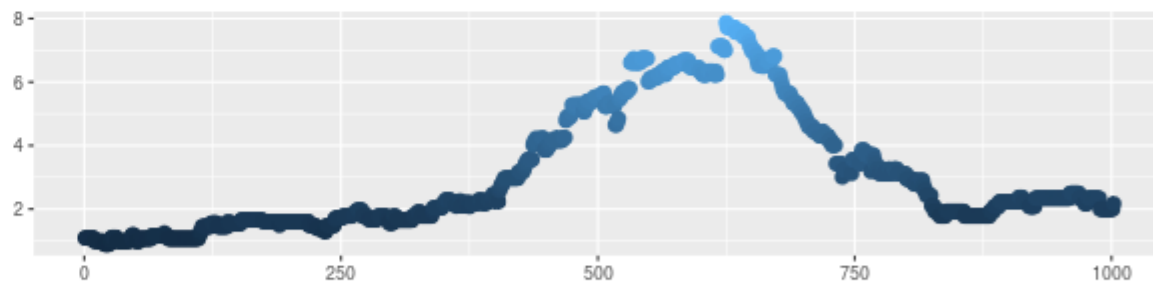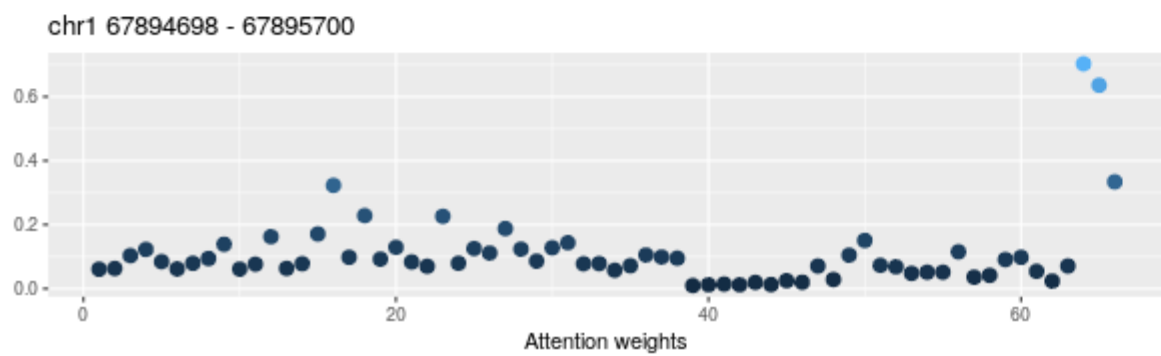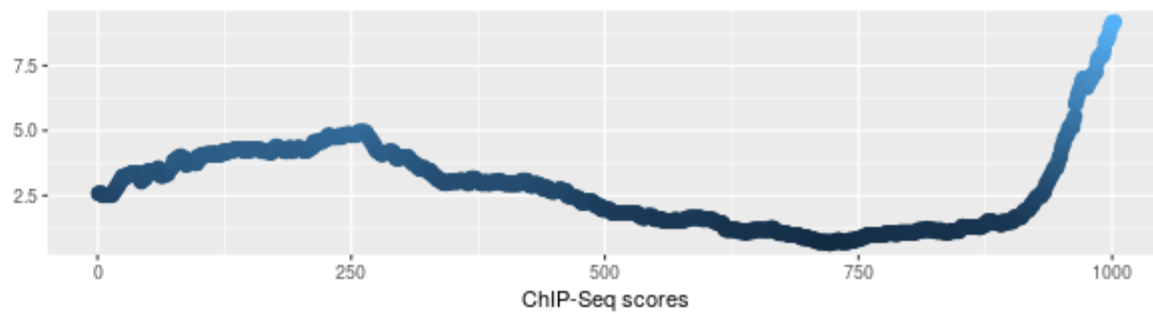

# Pairwise attention module

## EGR1/liver

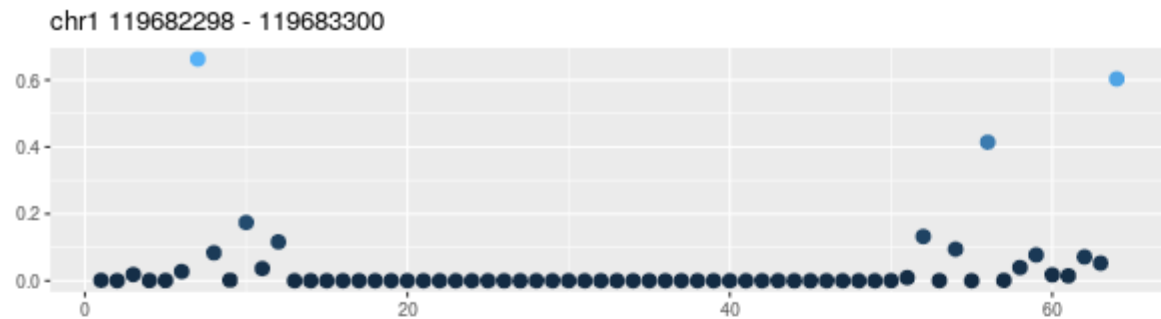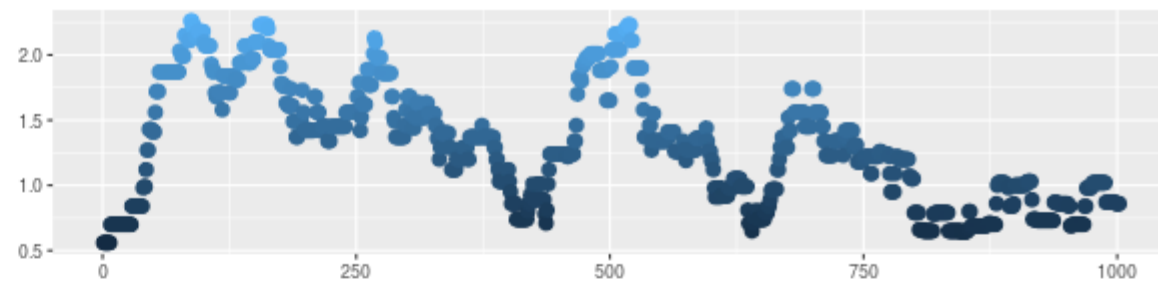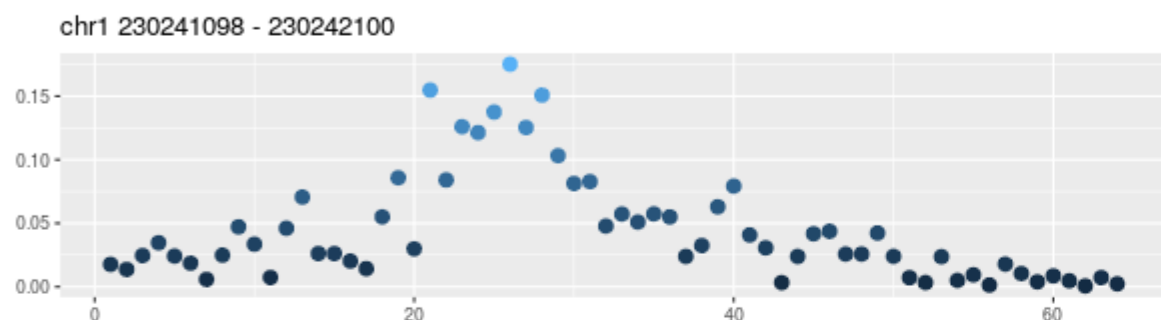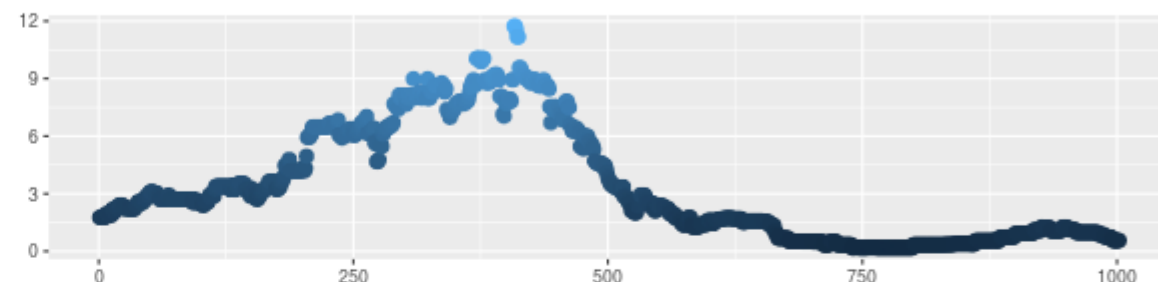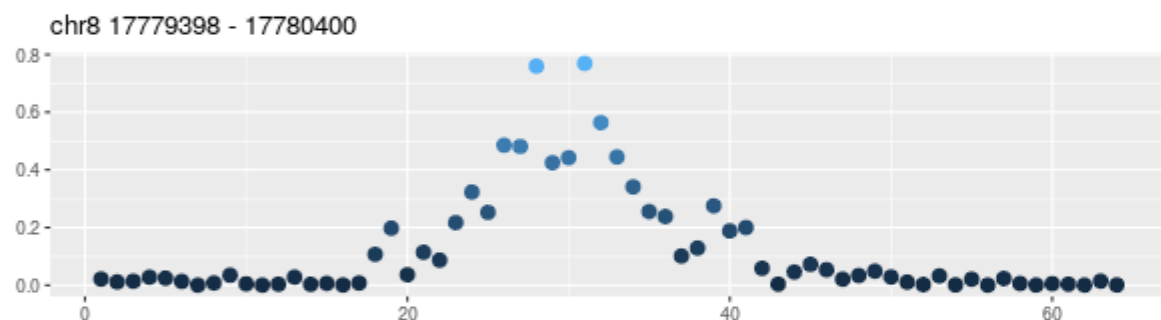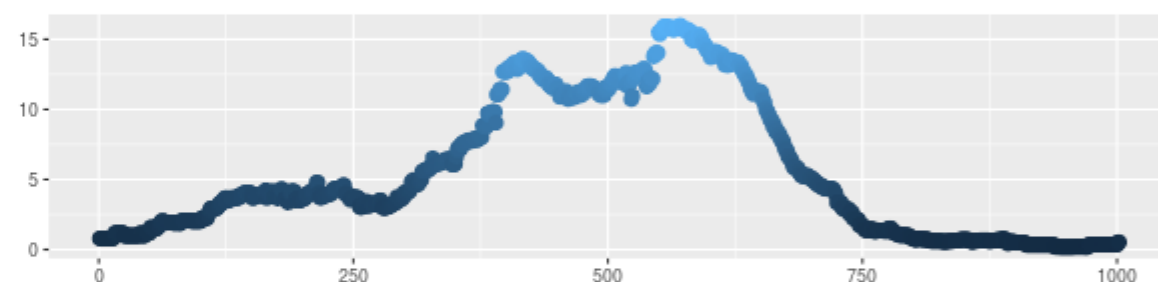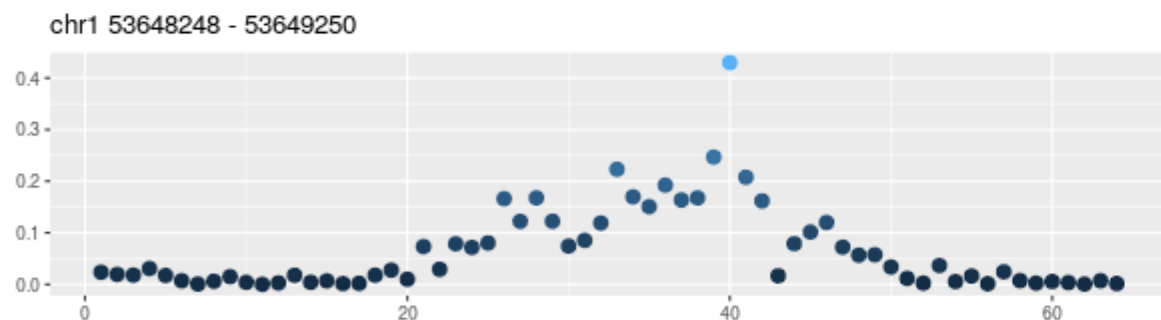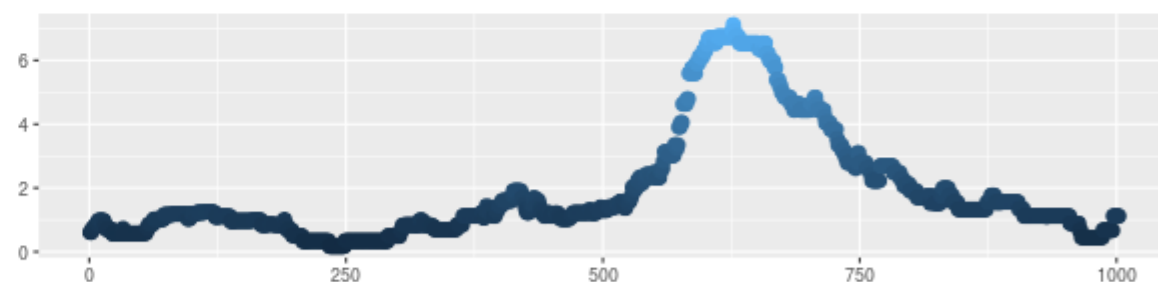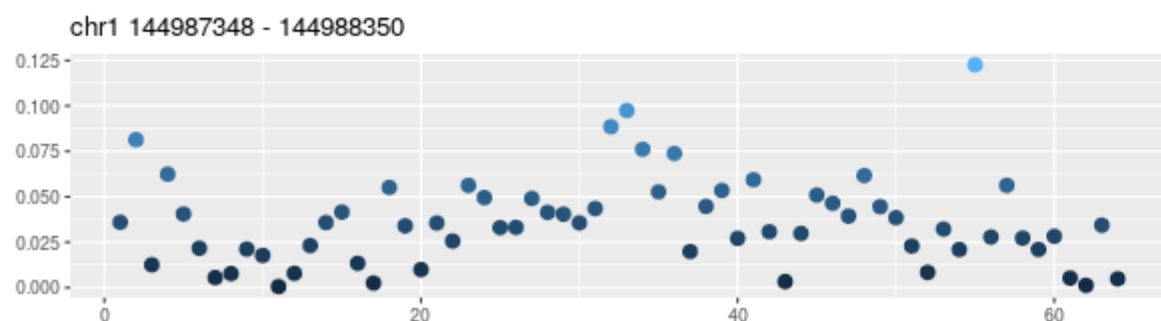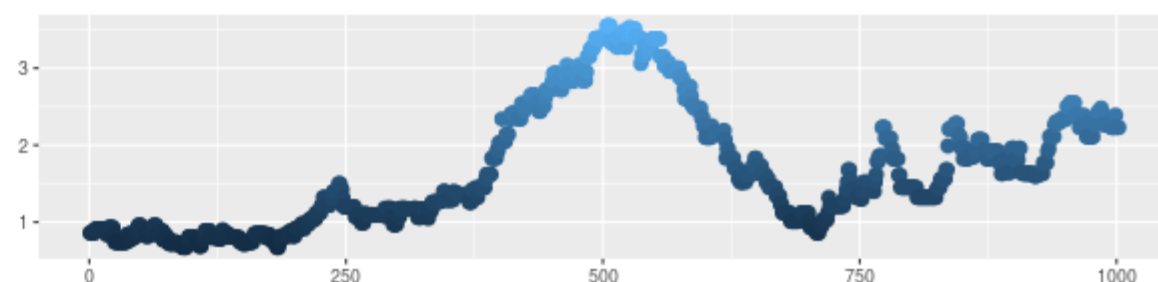

Attention weights

CHIP-seq score

# Pairwise attention module

## FOXA1/liver

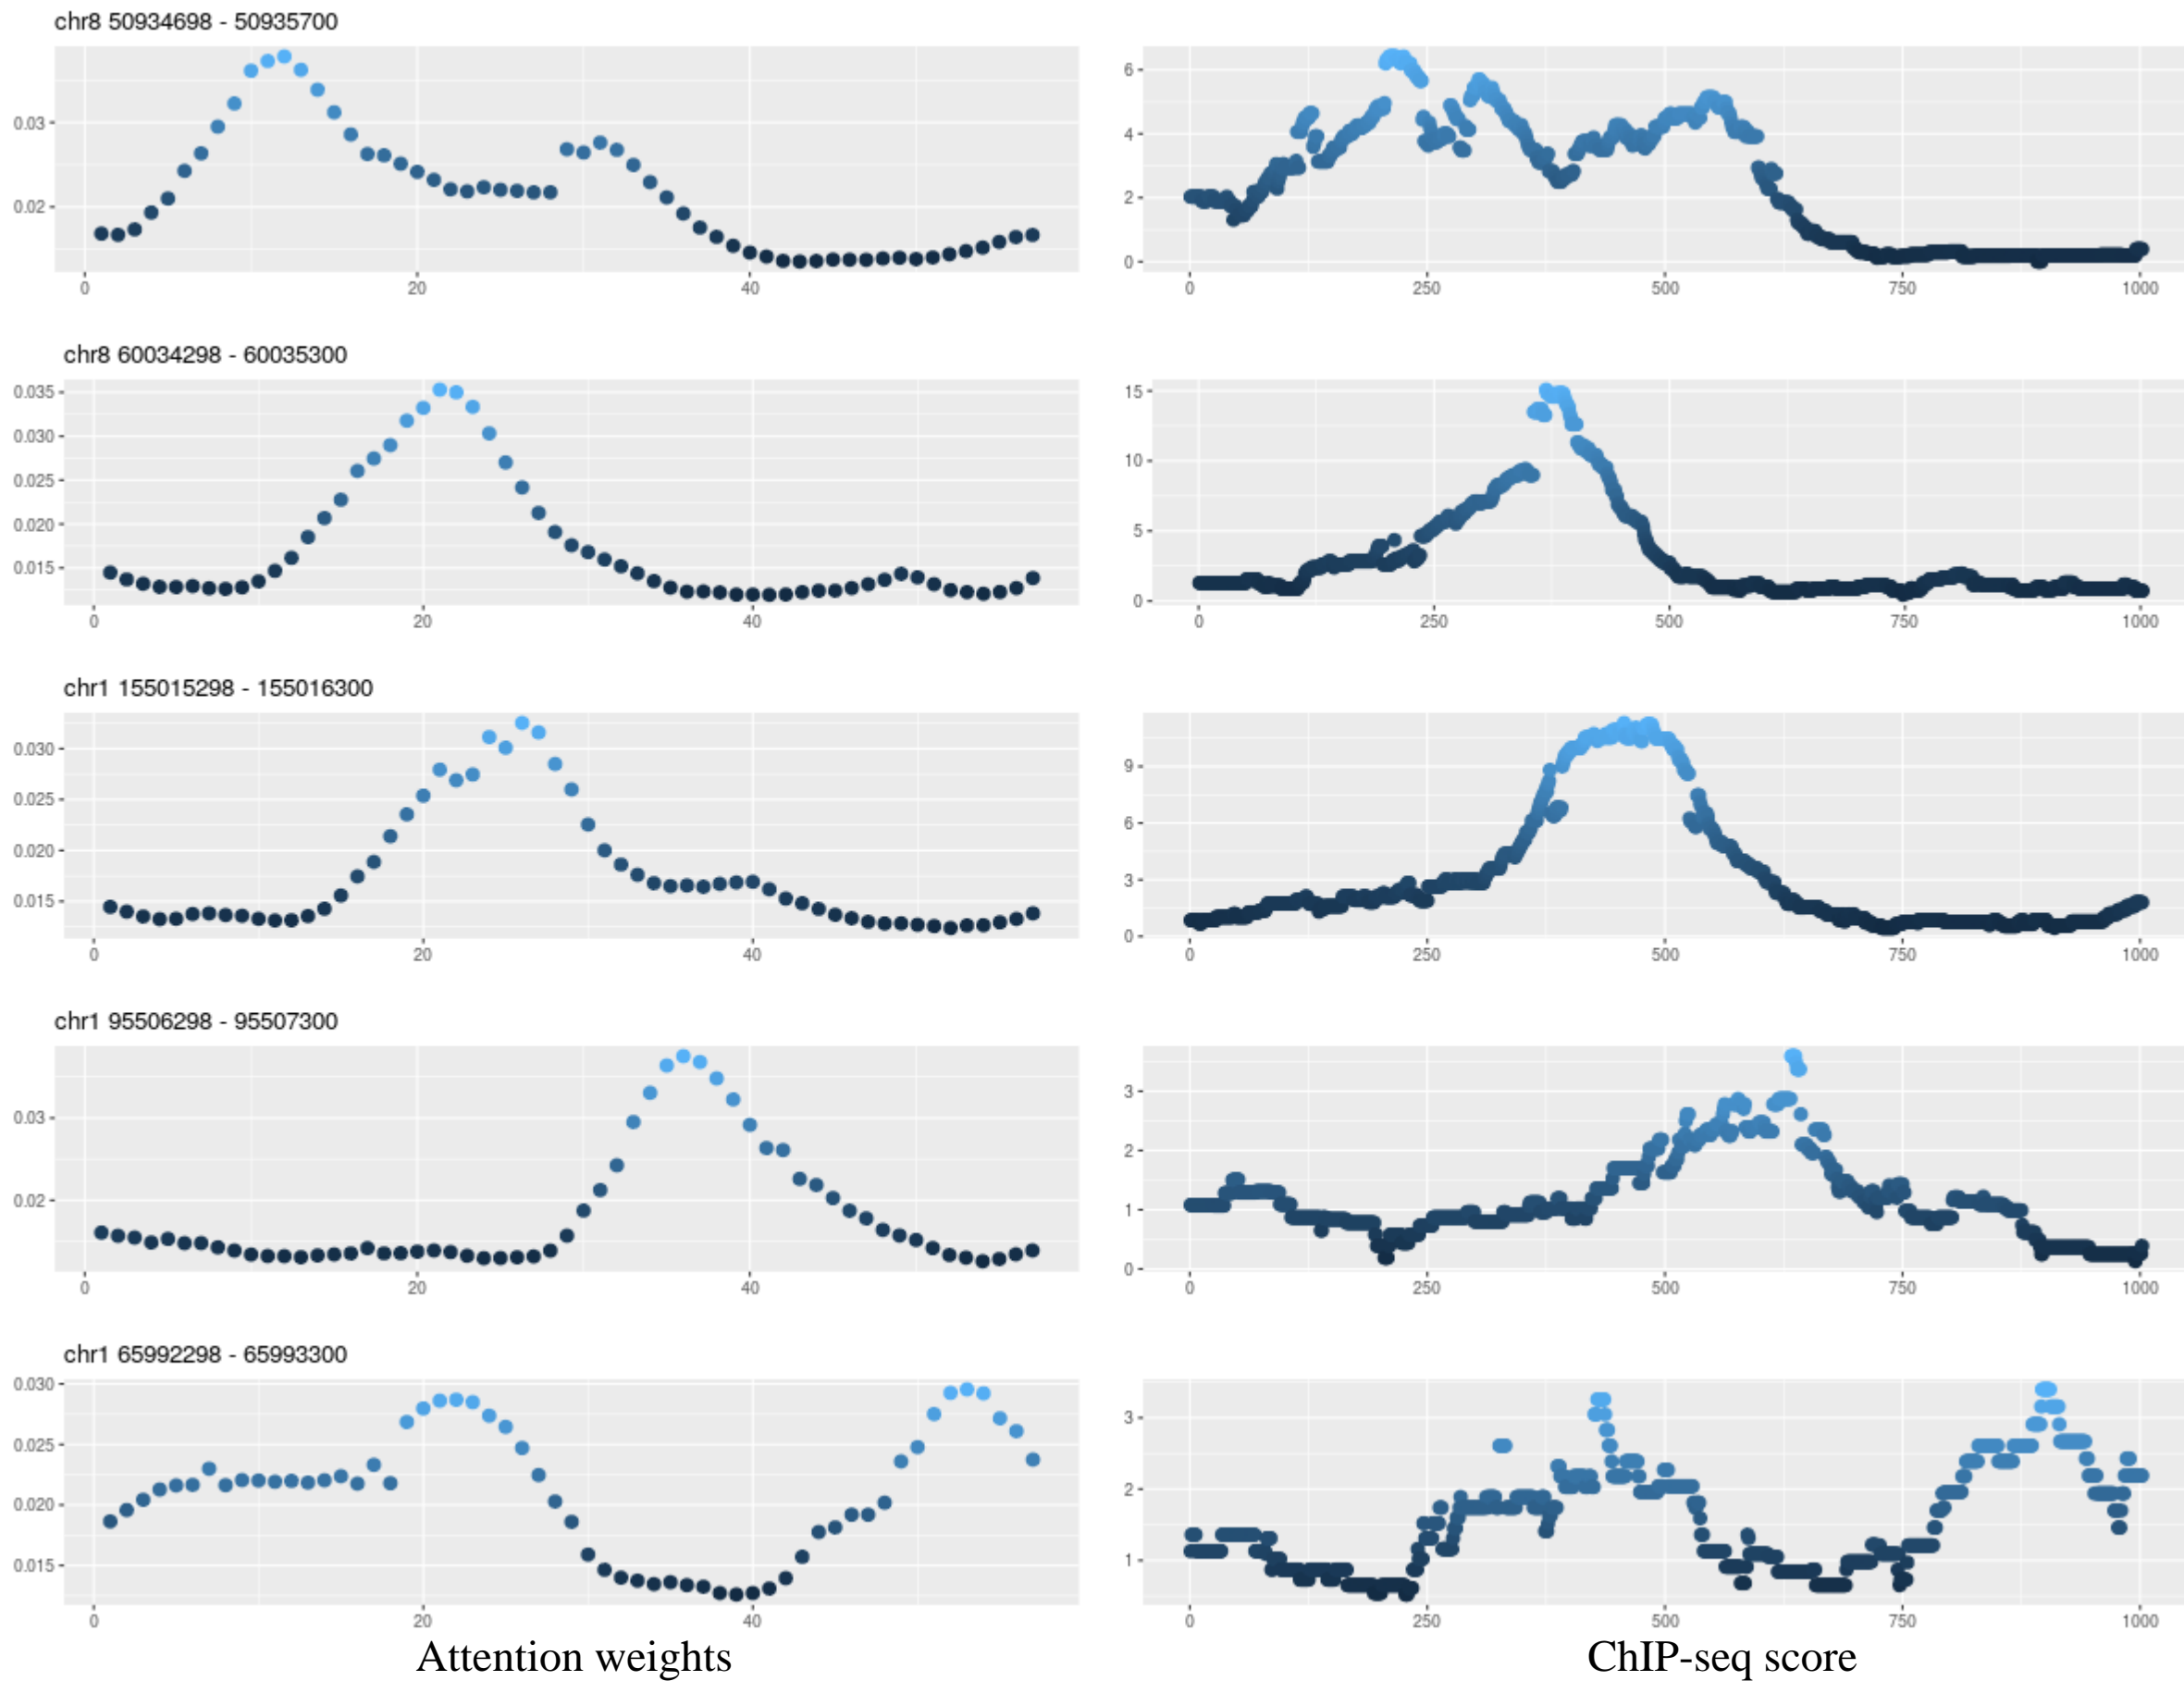

# Pairwise attention module

## FOXA2/liver

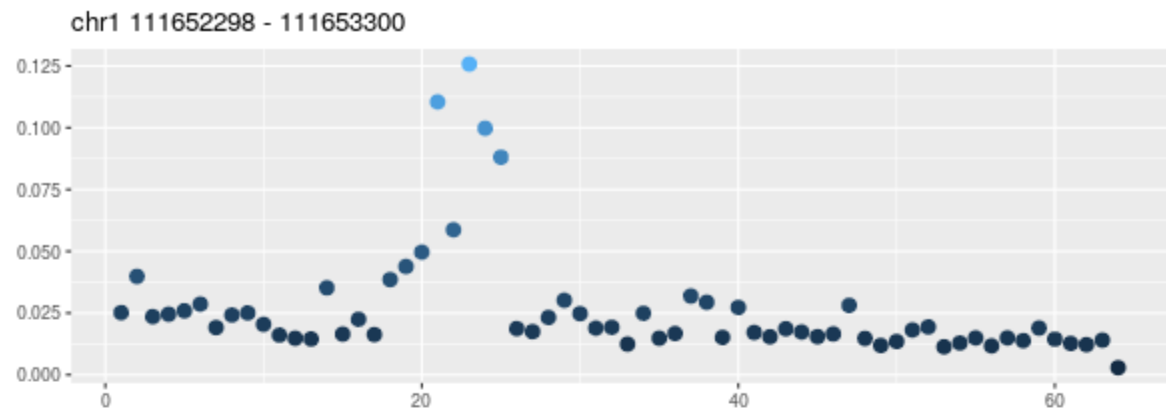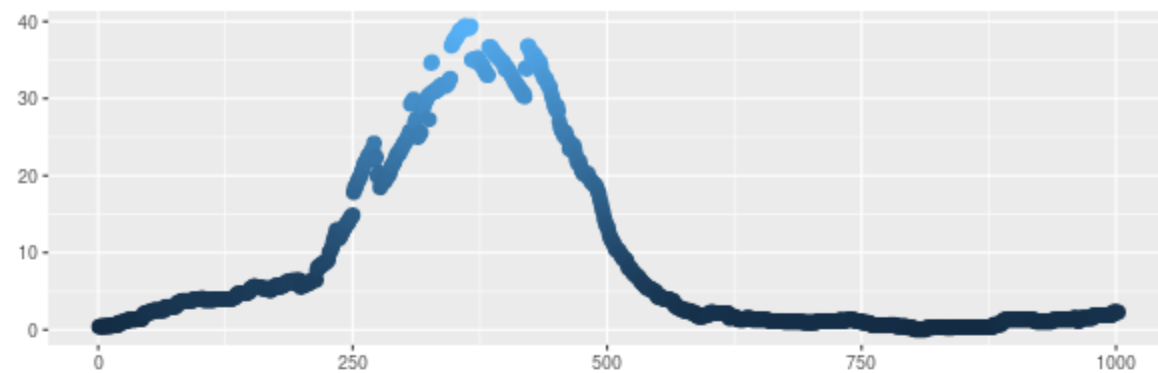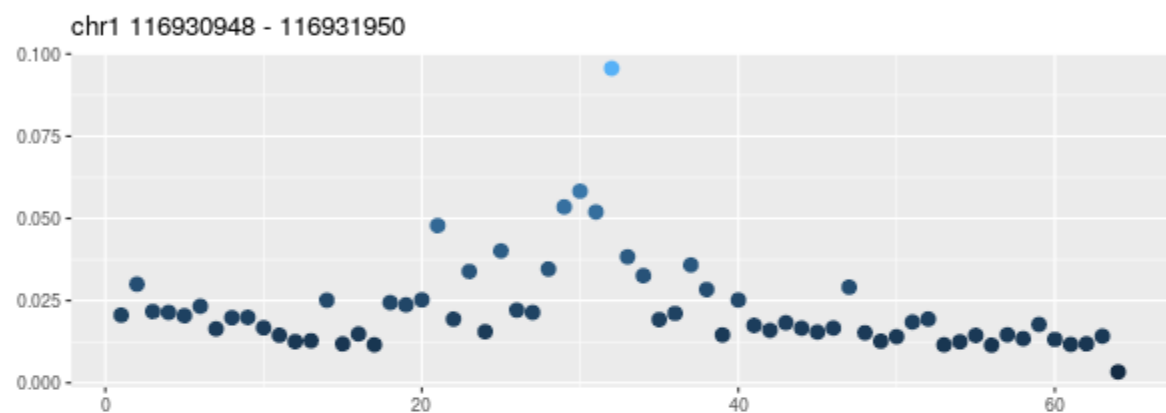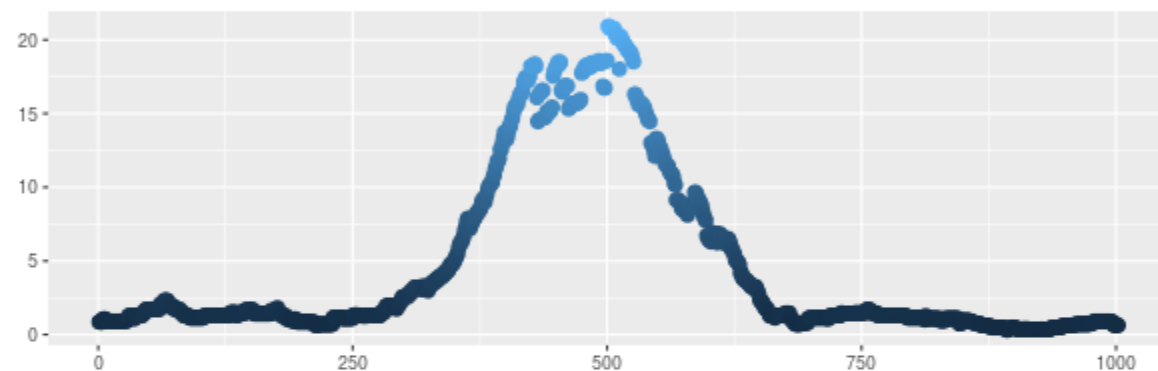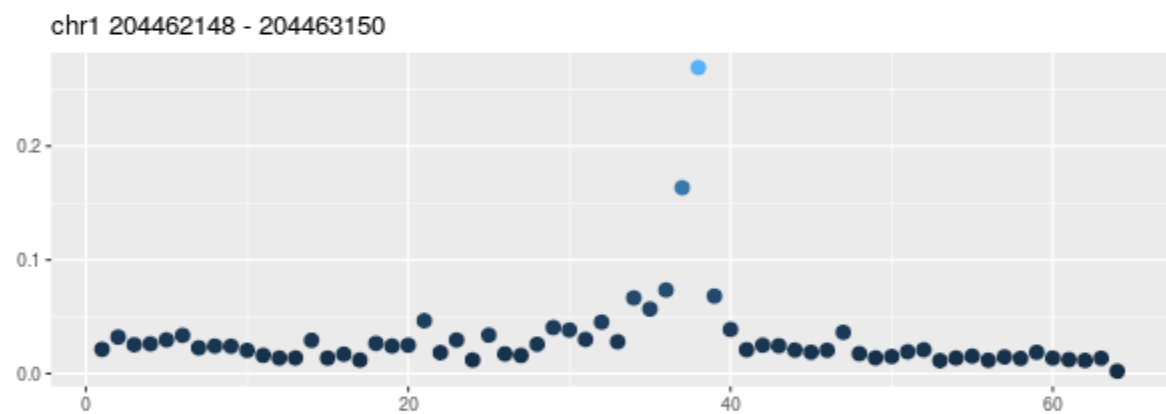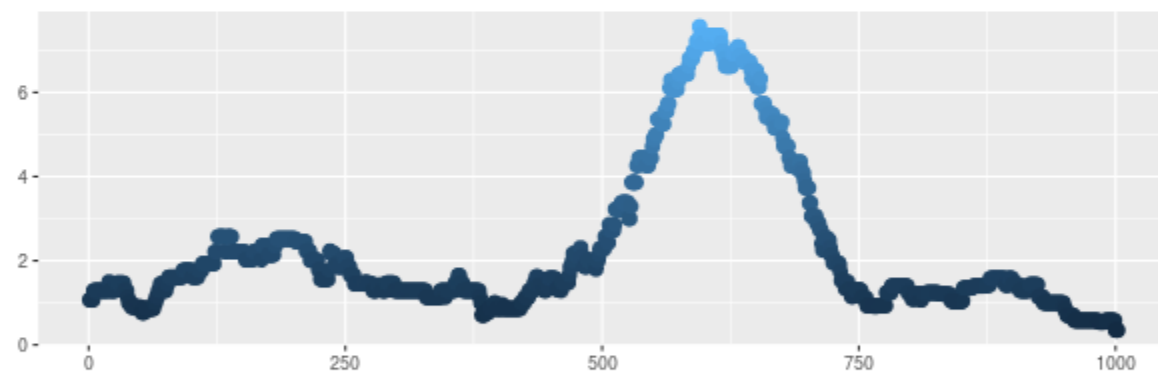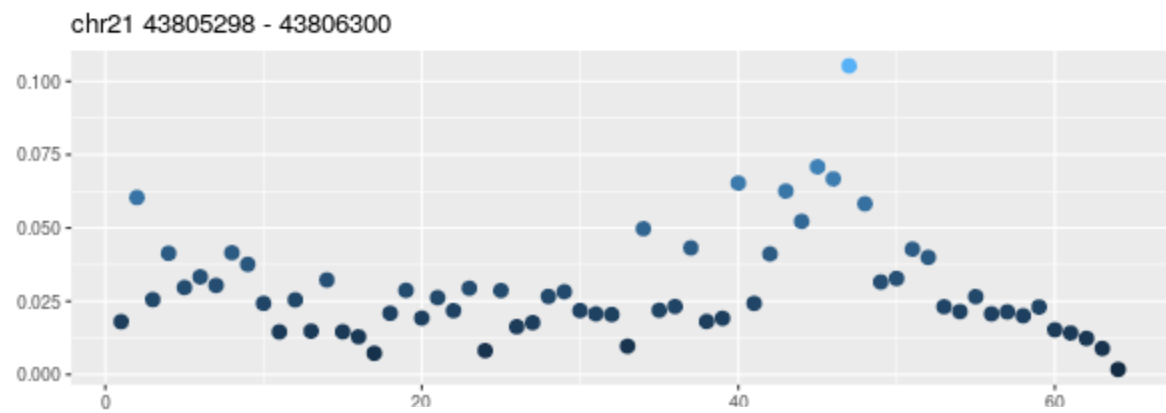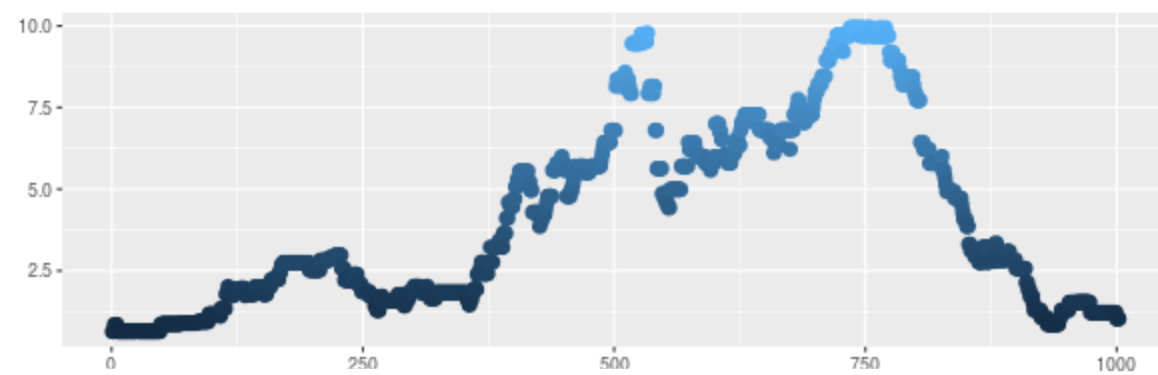

# Pairwise attention module

## GABPA/liver

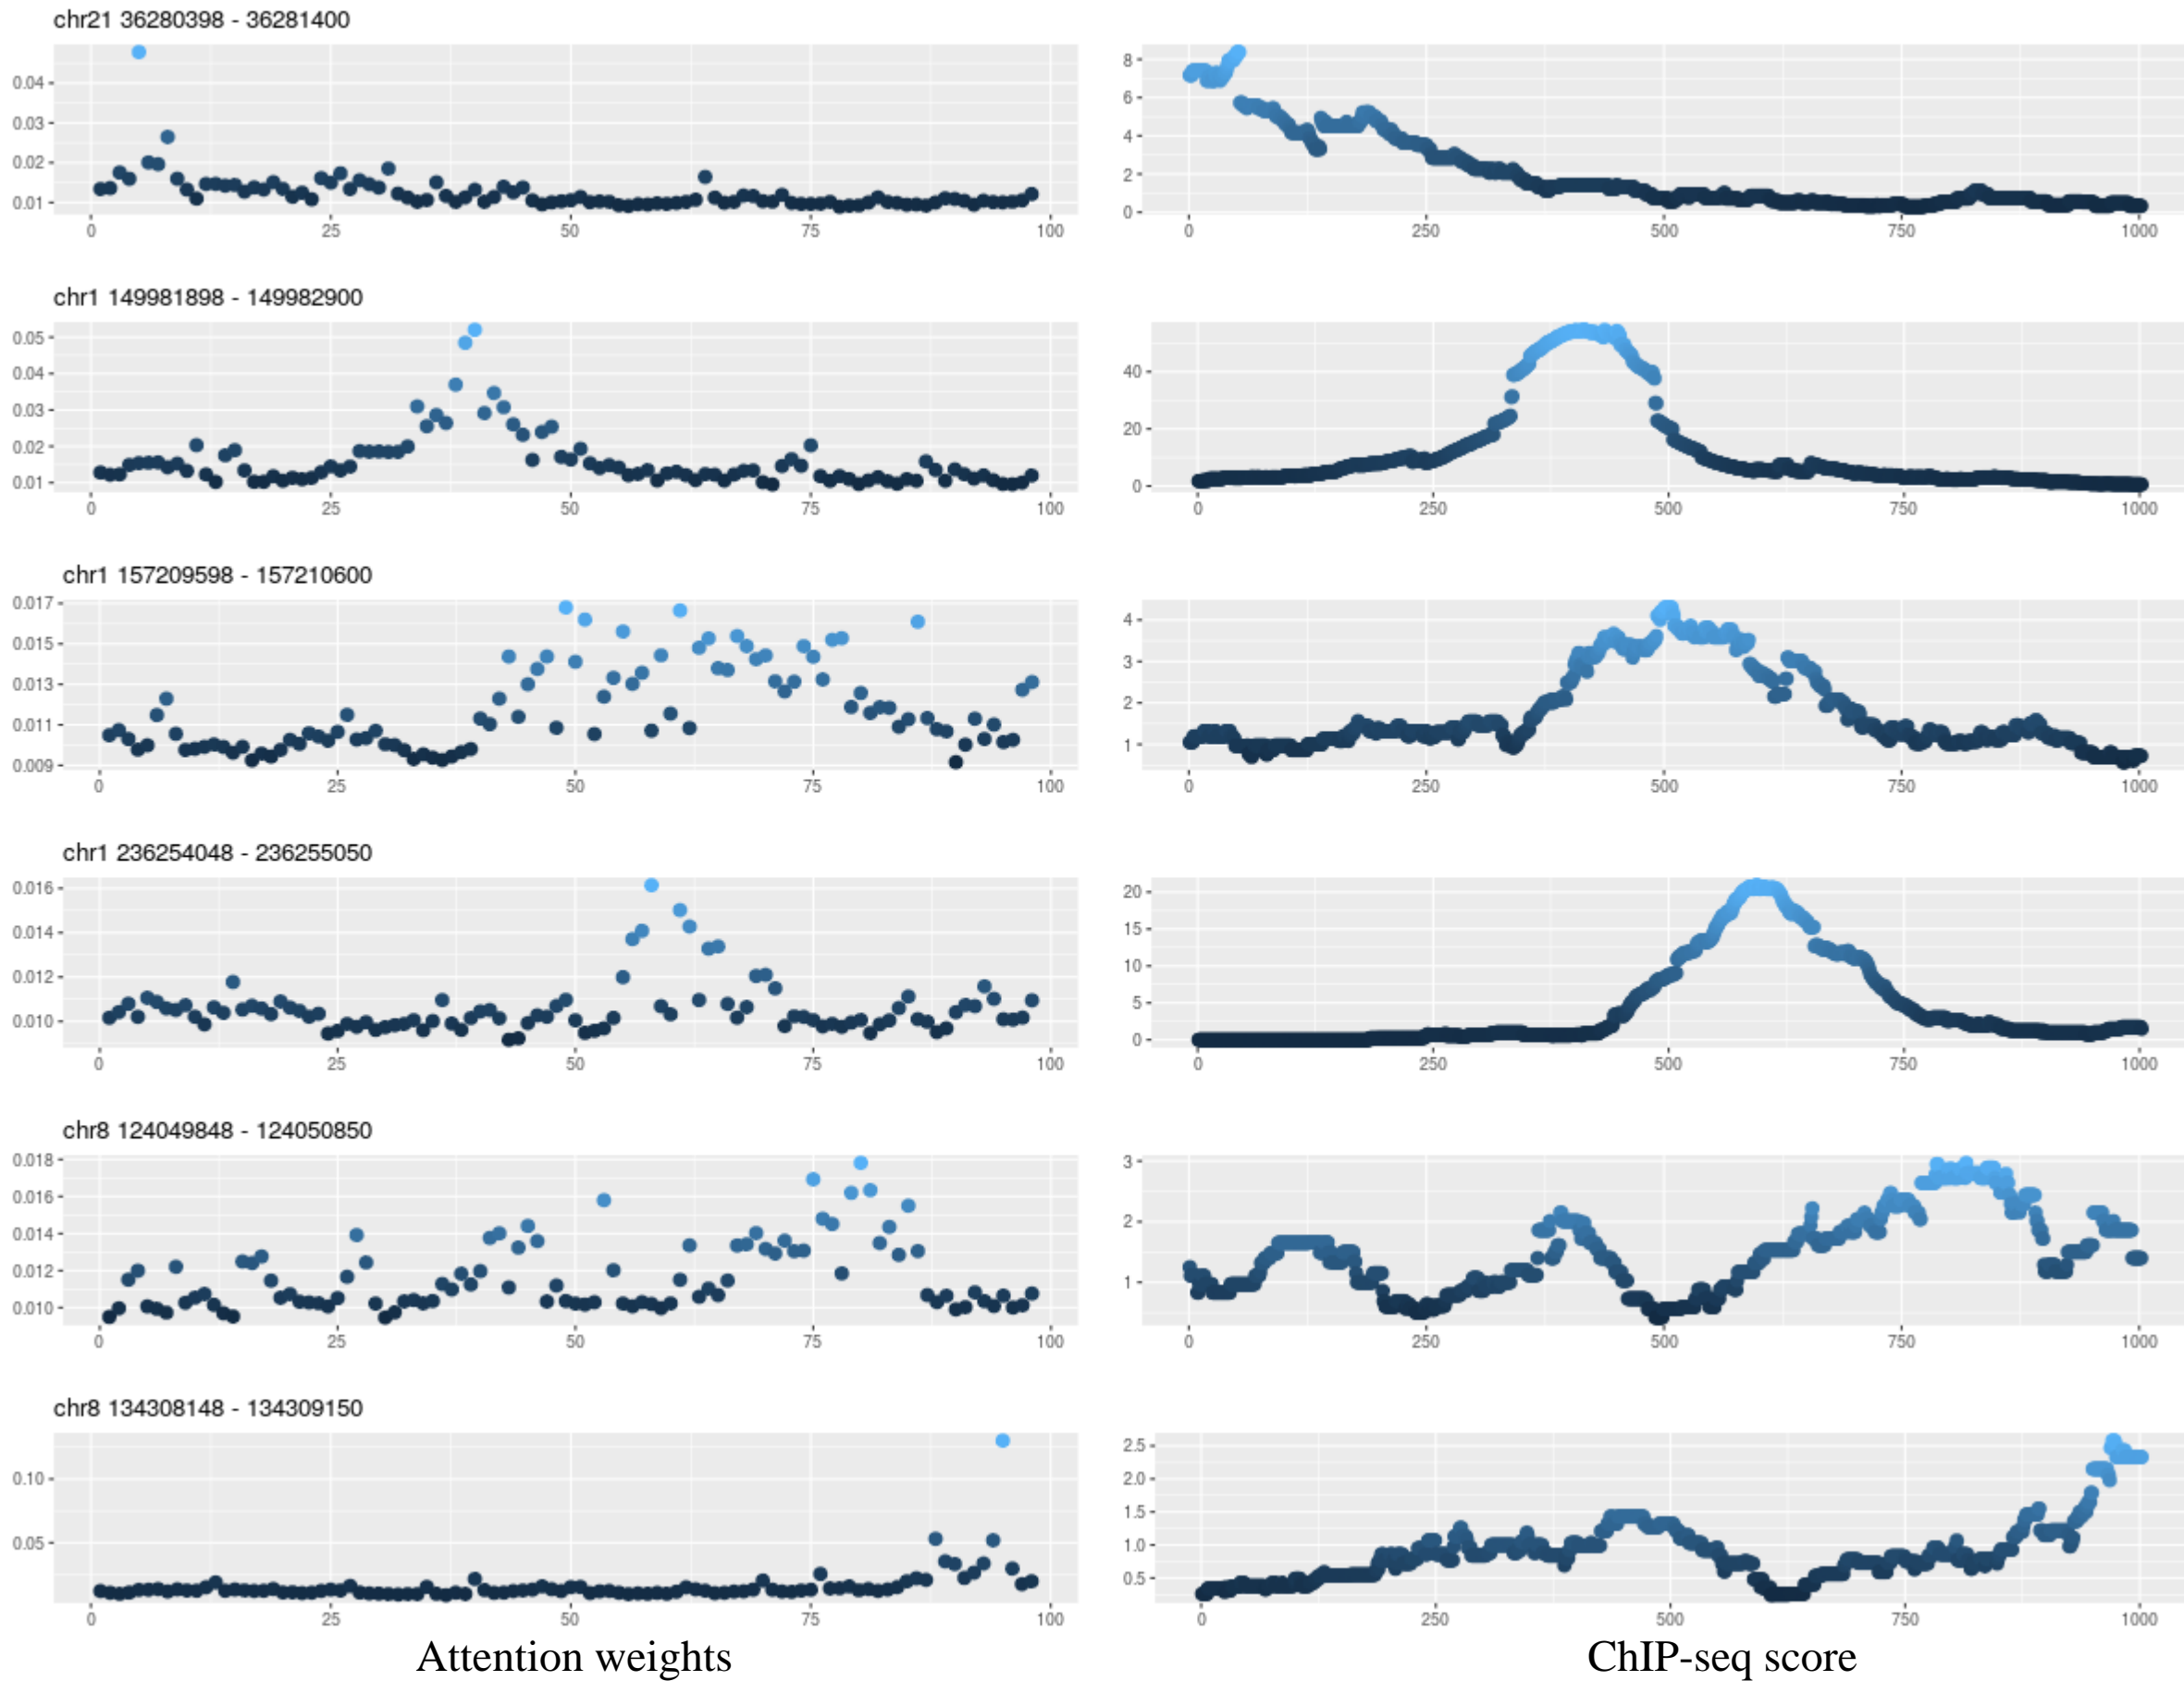

# Pairwise attention module

## HNF4A/liver

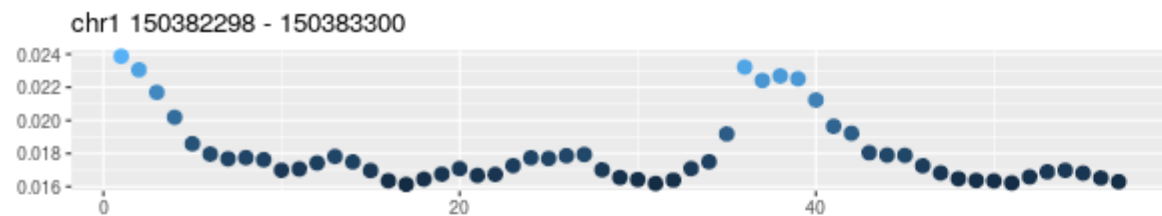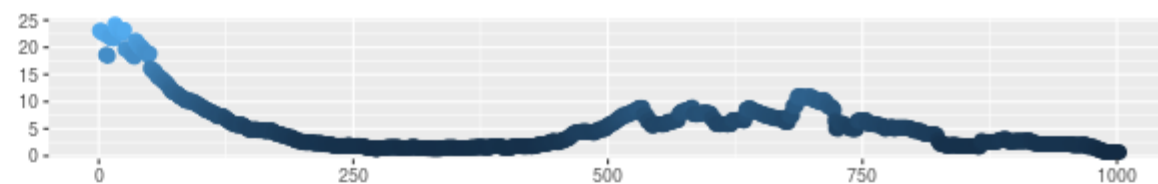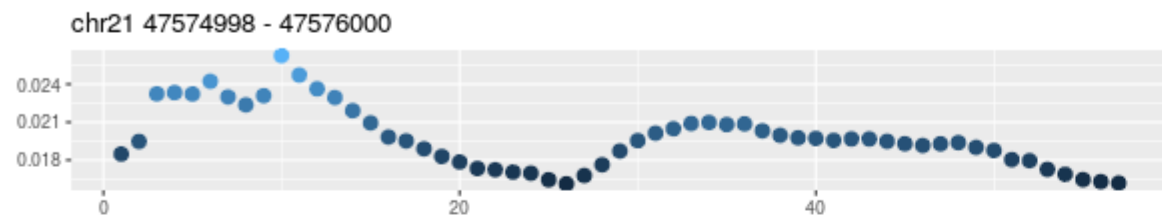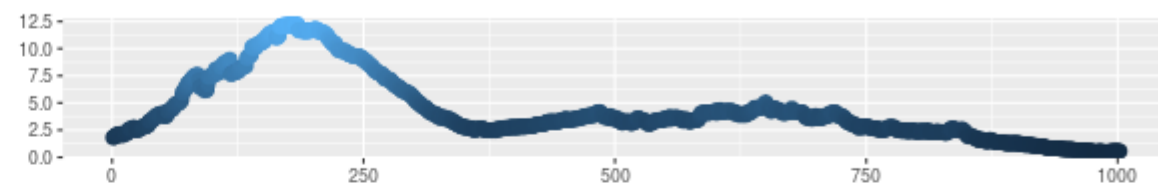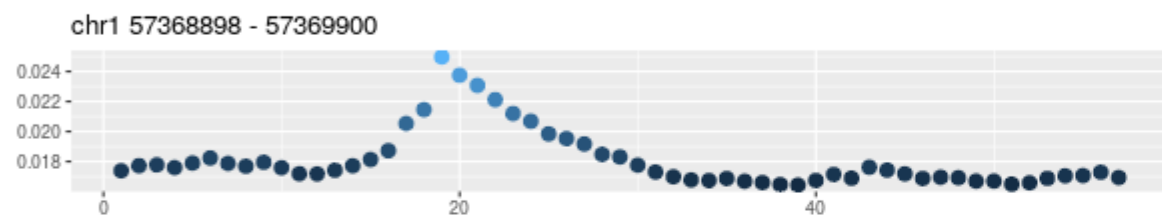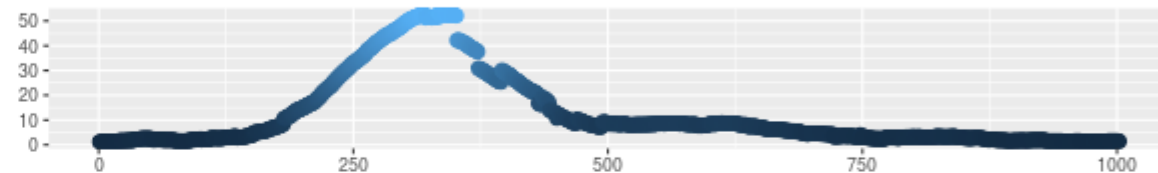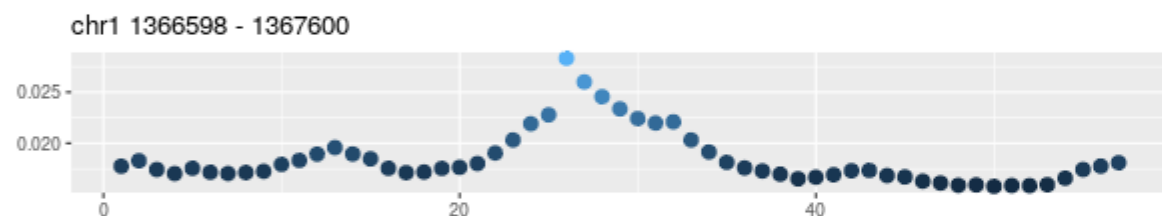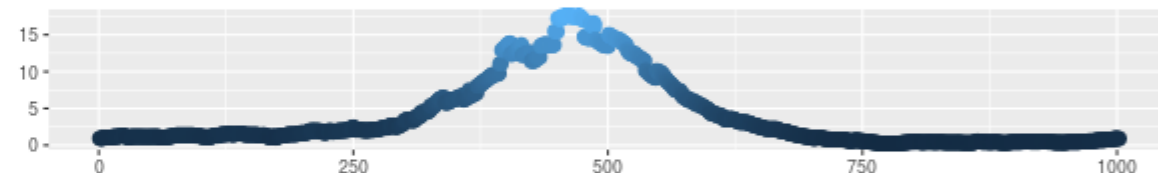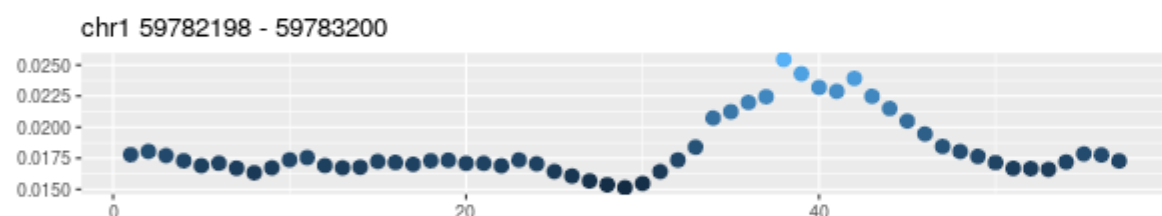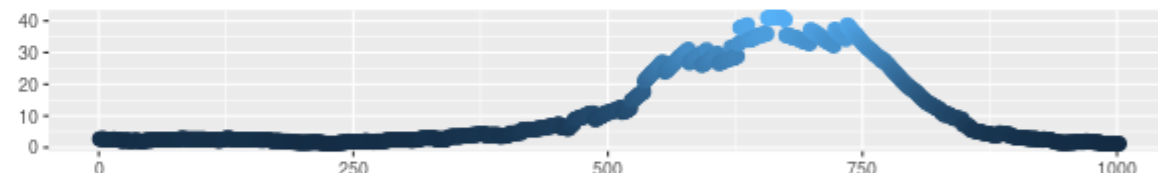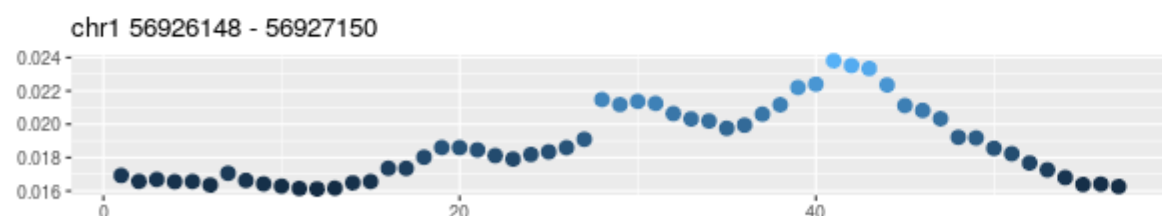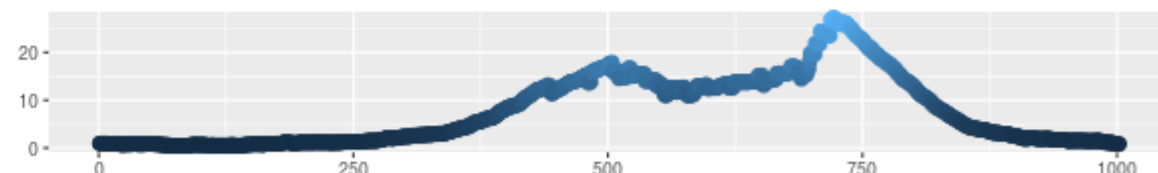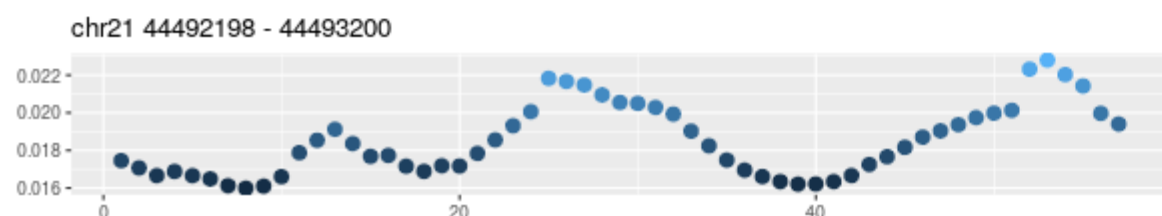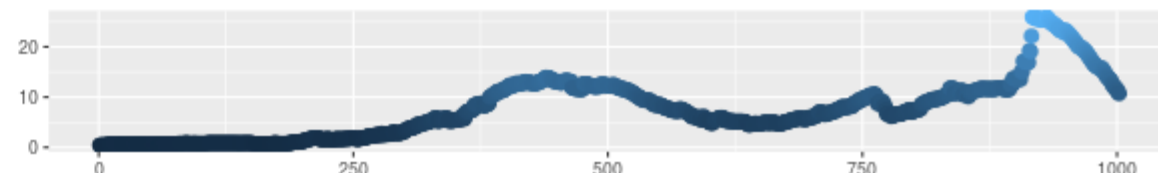

Attention weights

CHIP-seq score

# Pairwise attention module

JUND/liver

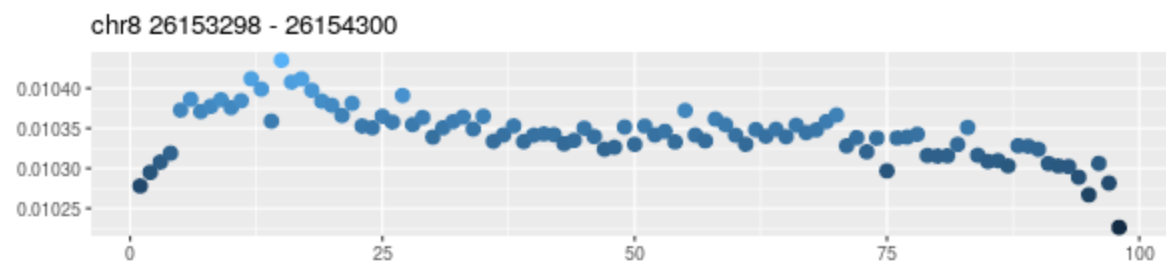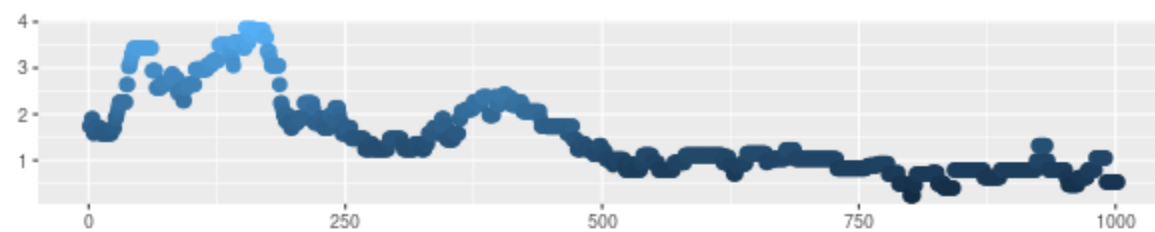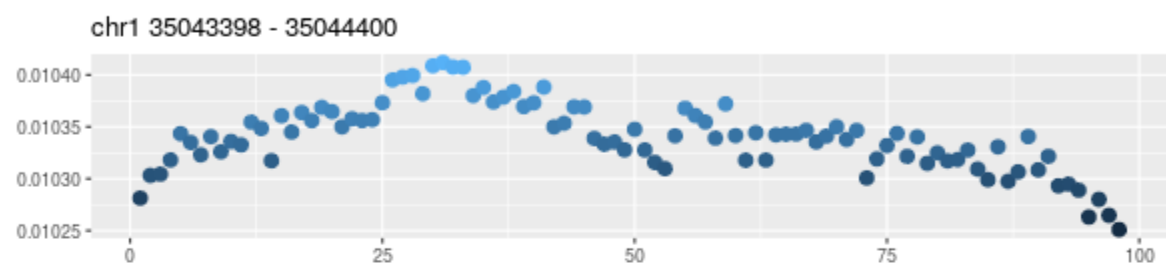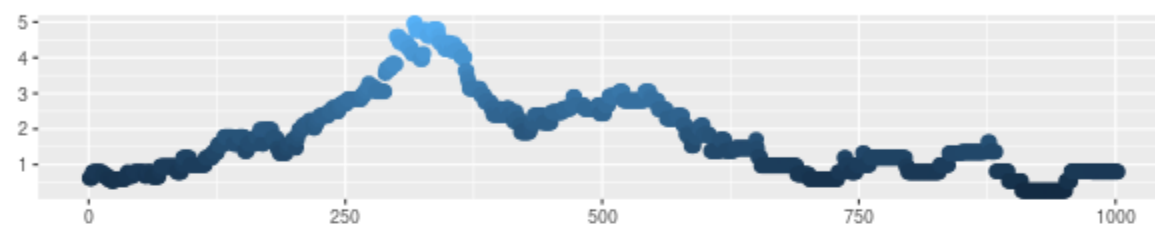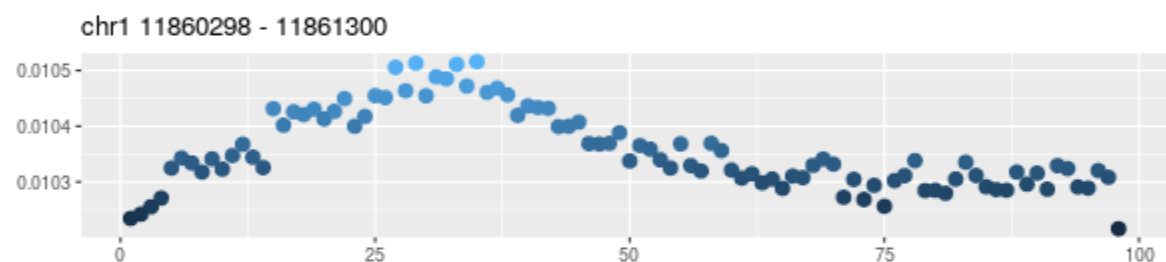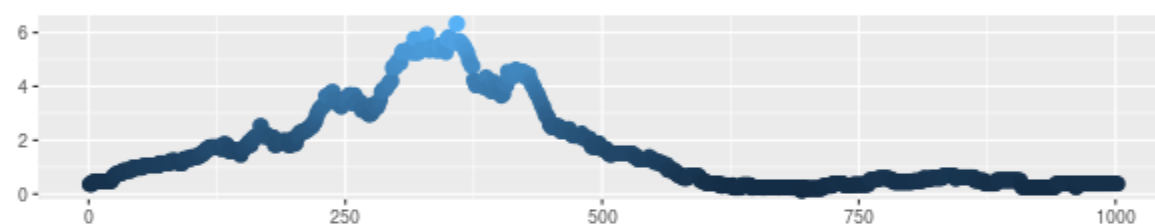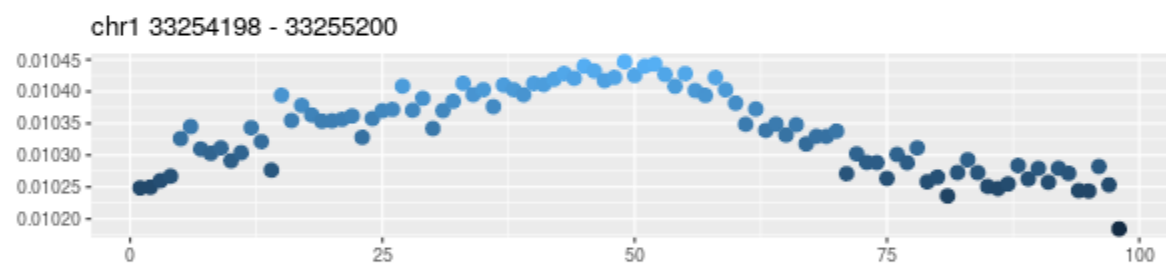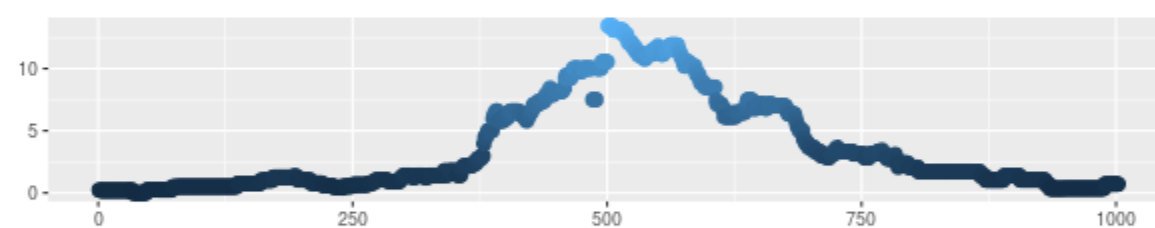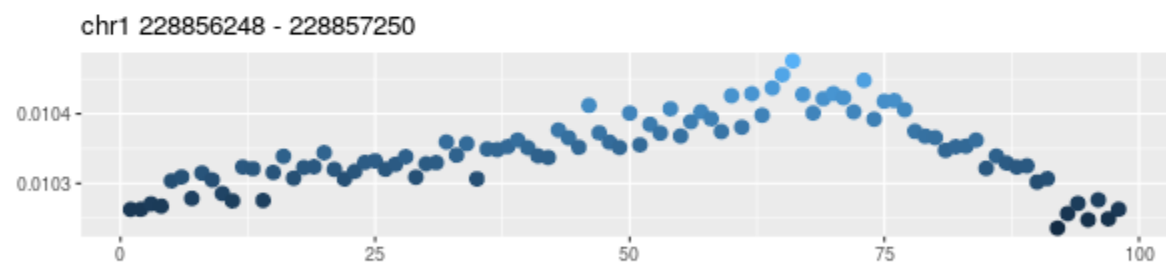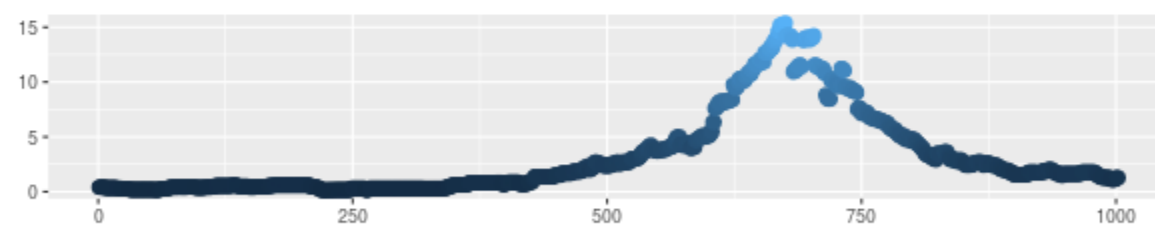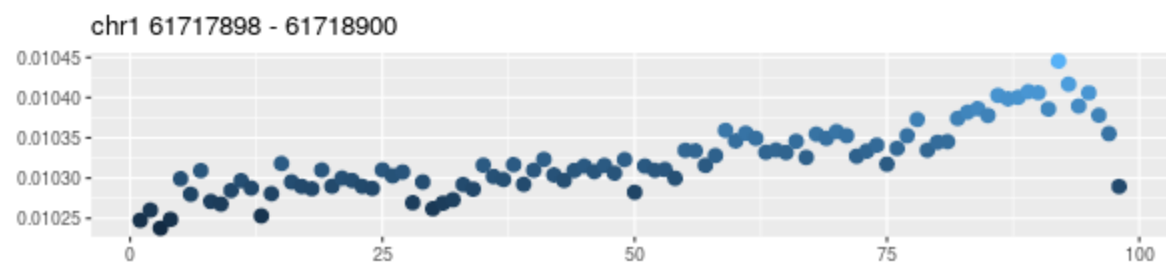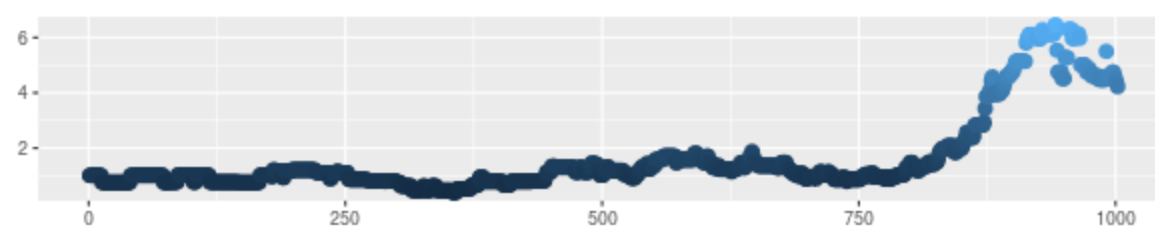

Attention weights

CHIP-seq score

# Pairwise attention module

## MAX/liver

chr1 150980398 - 150981400

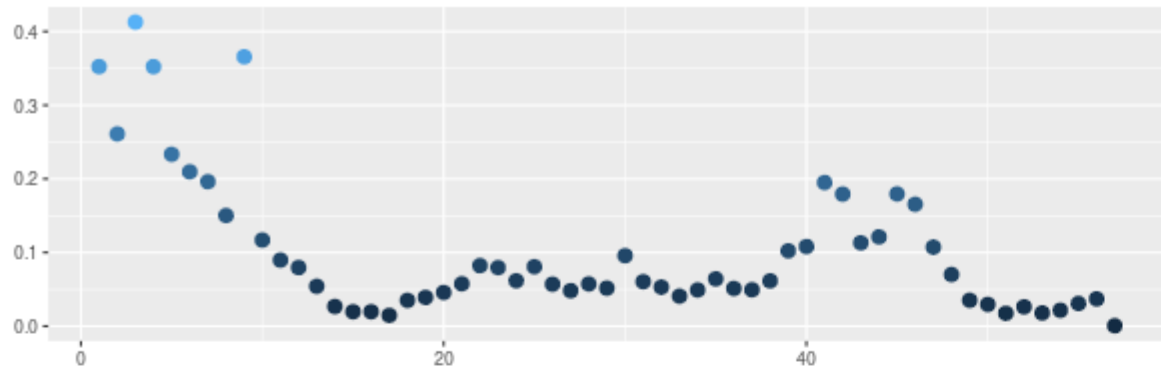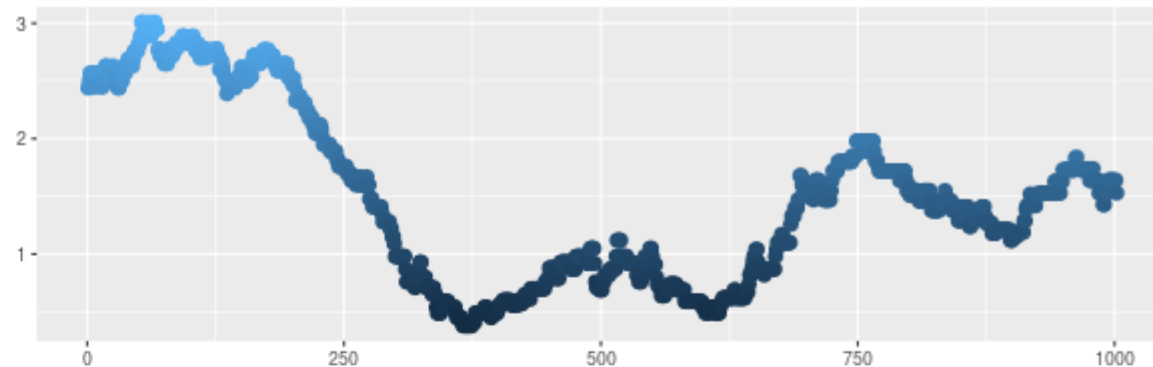

chr1 28558698 - 28559700

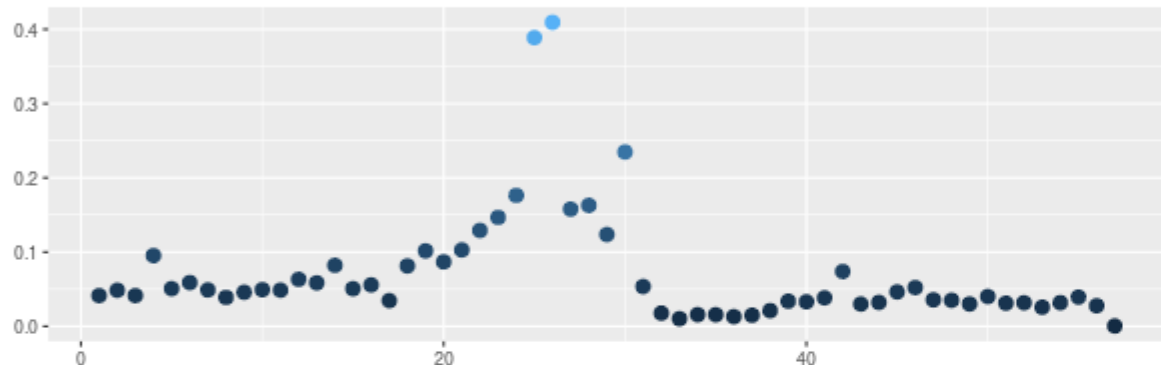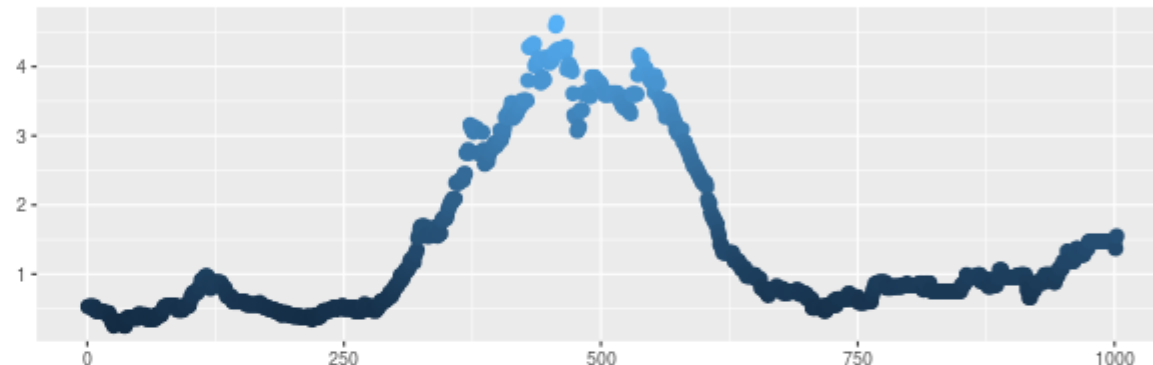

chr1 171453548 - 171454550

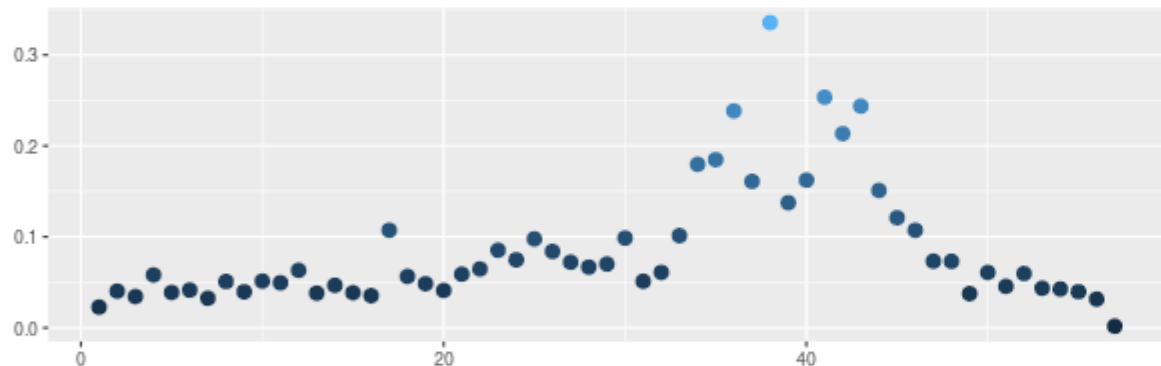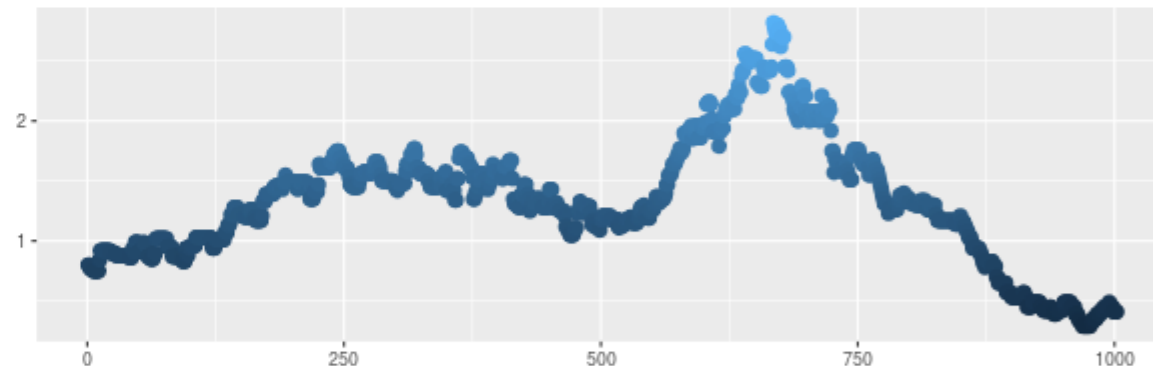

chr1 234667348 - 234668350

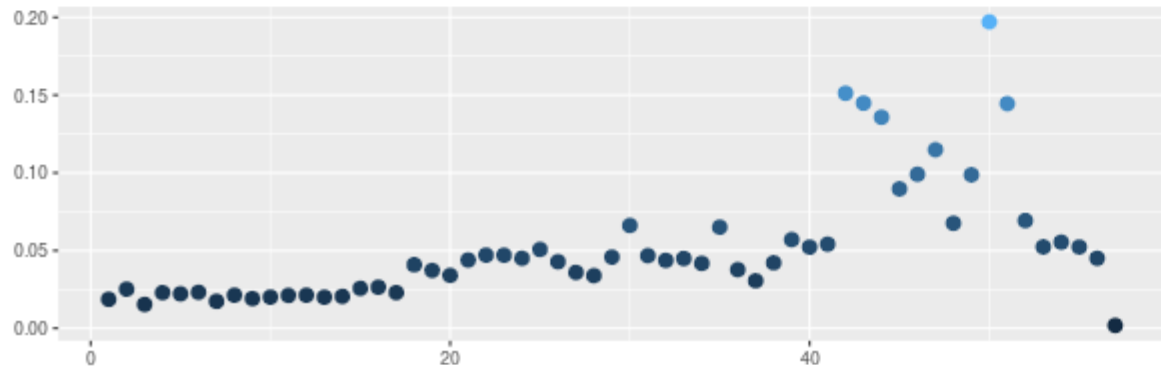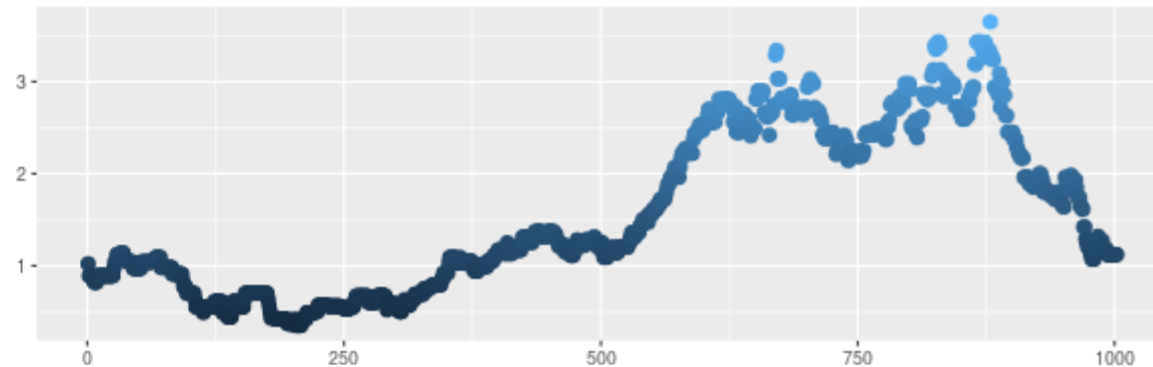

Attention weights

CHIP-seq score



# Pairwise attention module

## NANOG/induced pluripotent stem cell

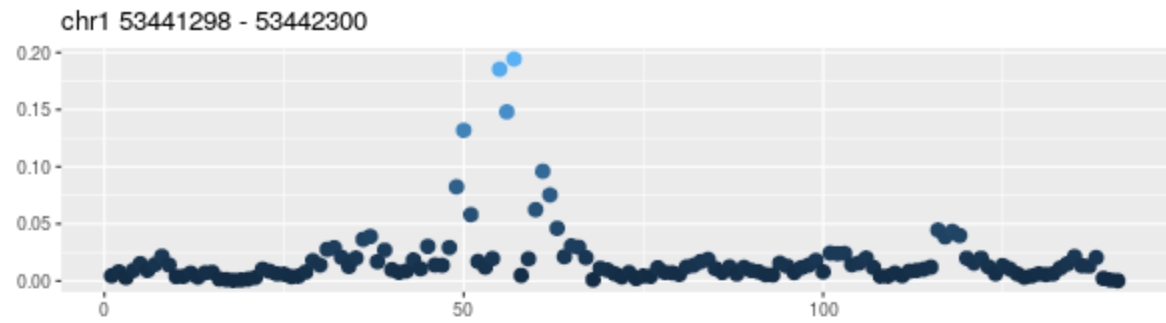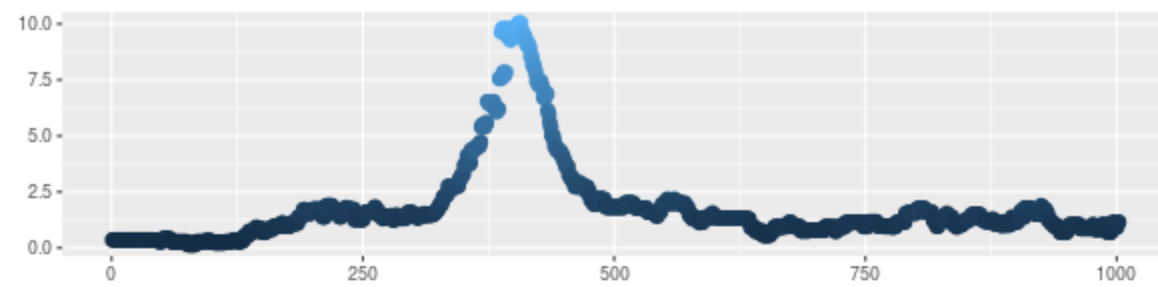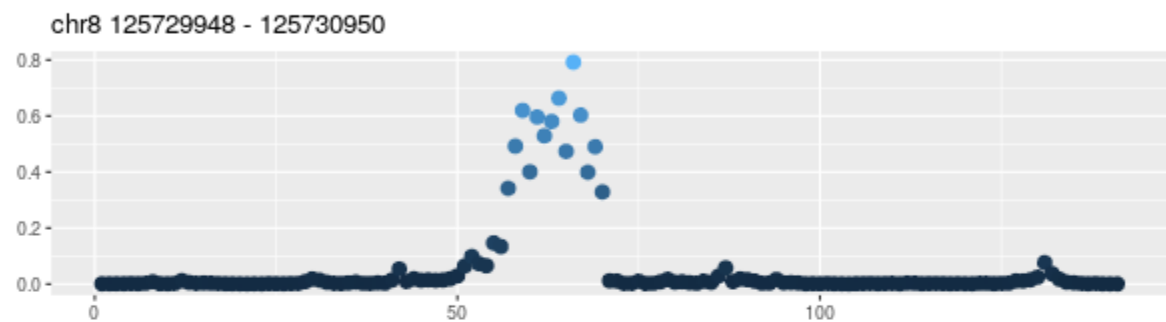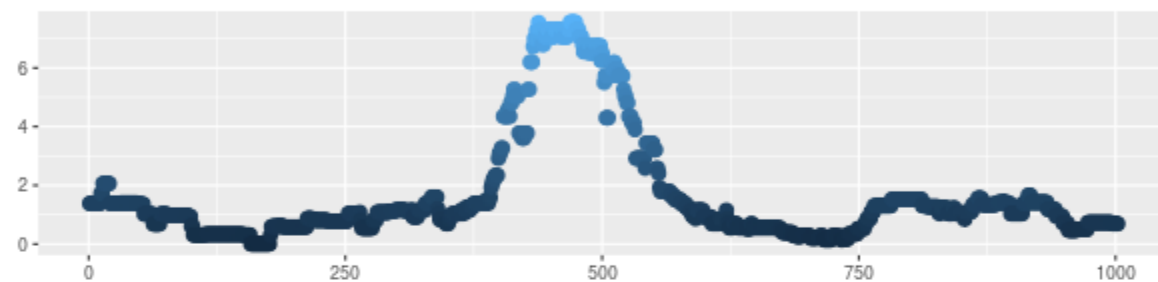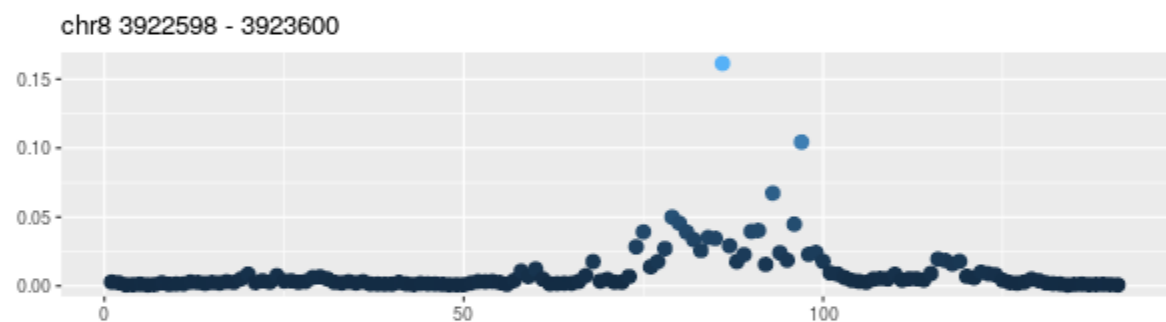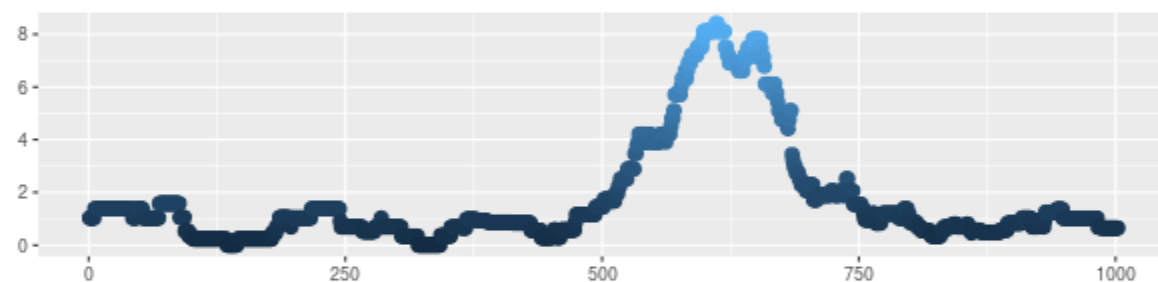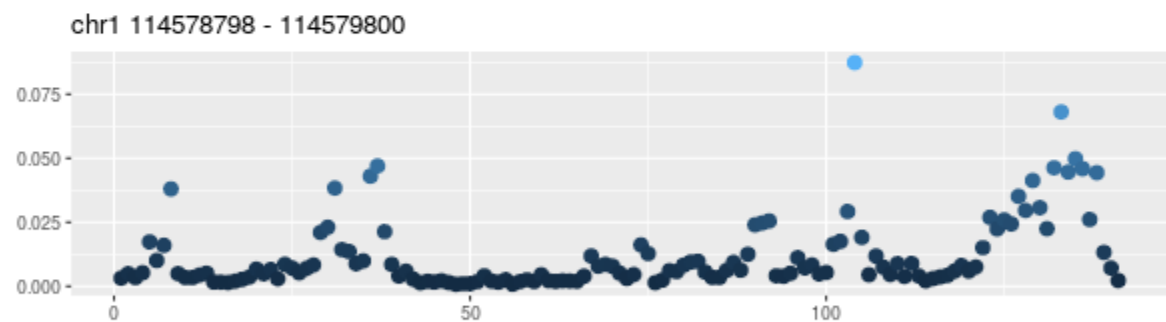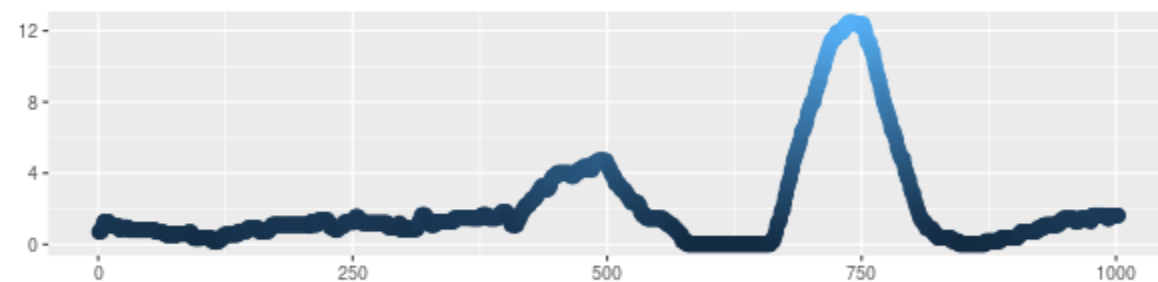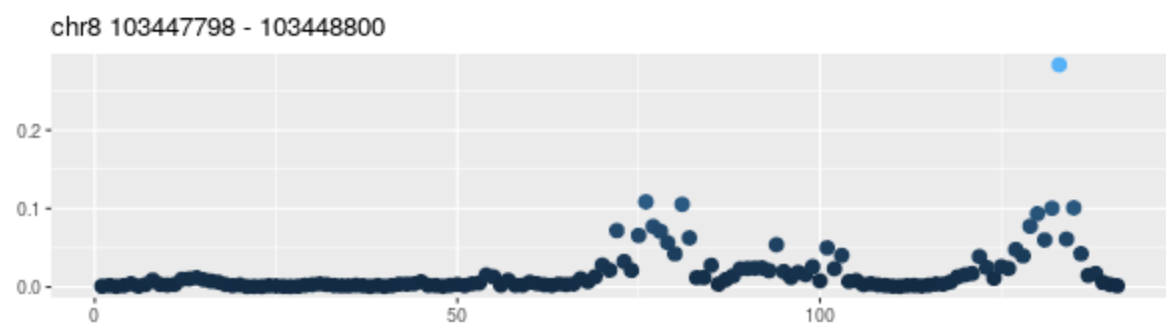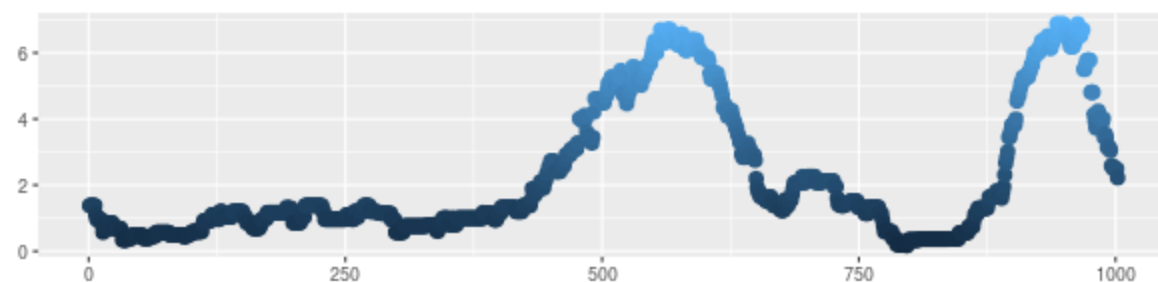

Attention weights

CHIP-seq score

# Pairwise attention module

REST/liver

chr8 124428098 - 124429100

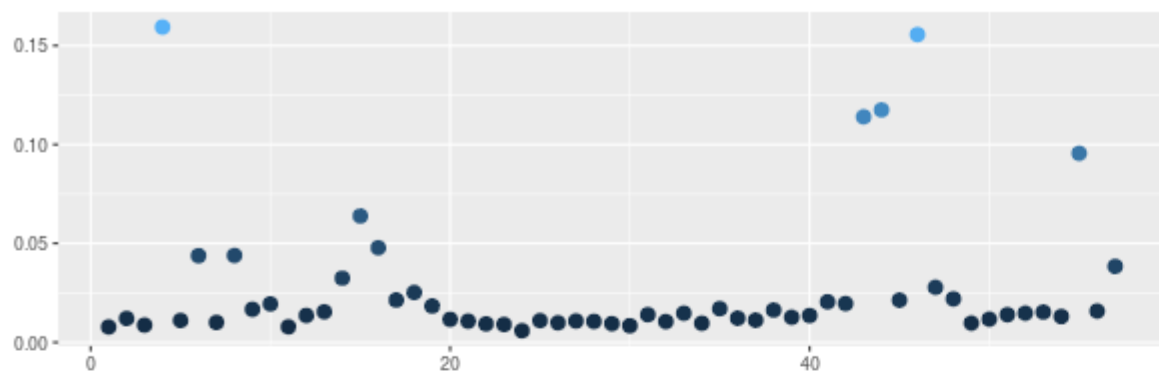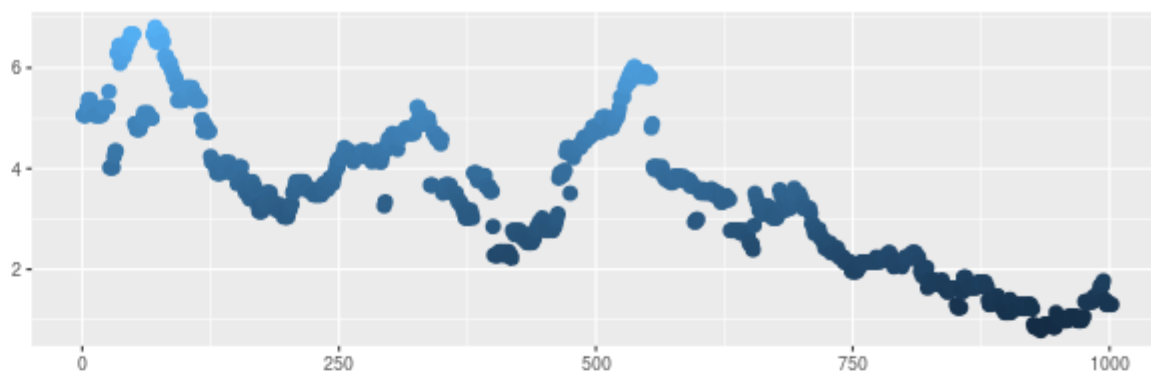

chr1 44433348 - 44434350

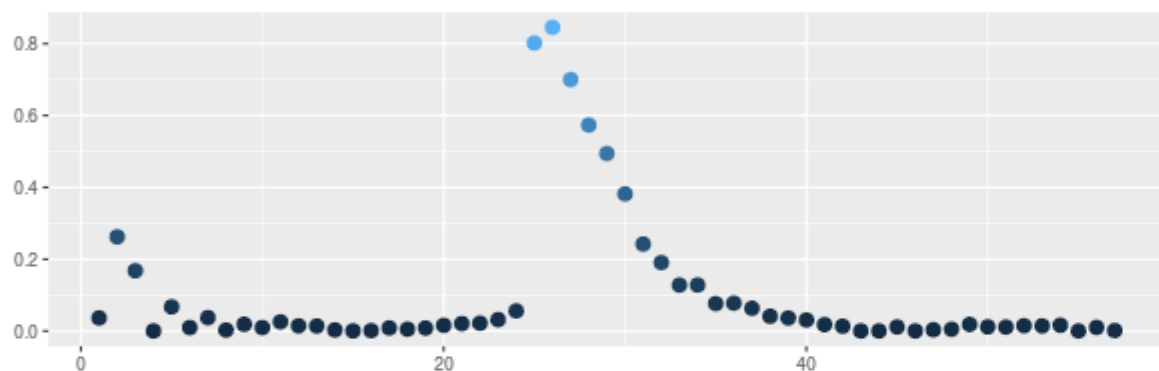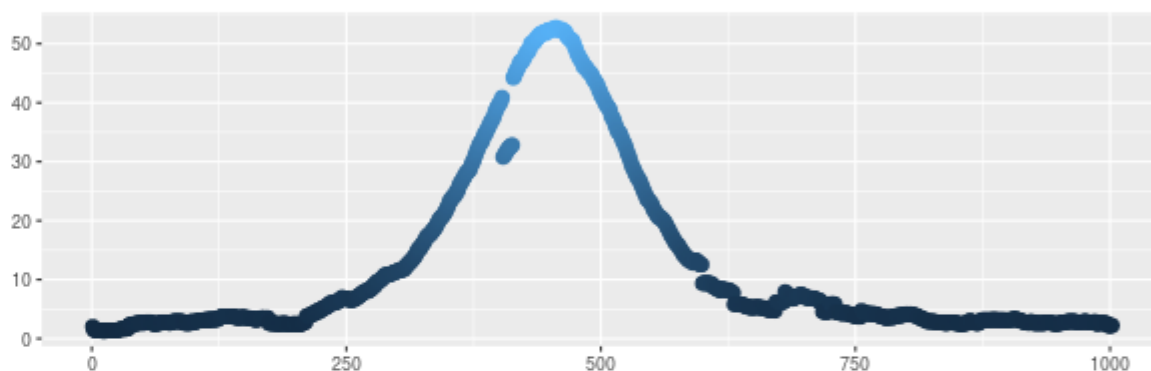

chr1 28051348 - 28052350

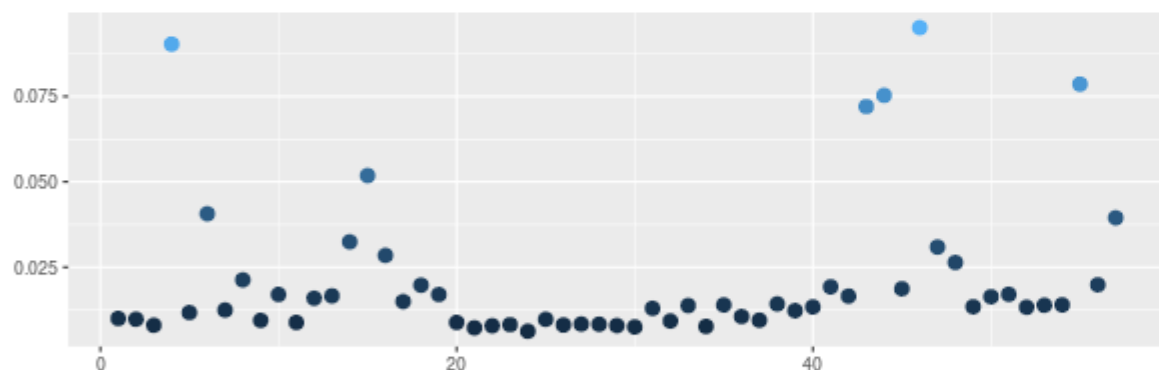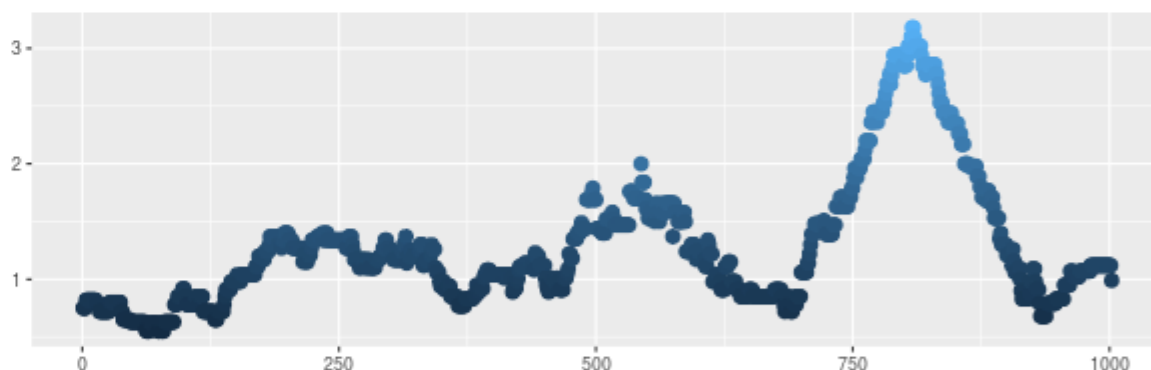

chr1 211326348 - 211327350

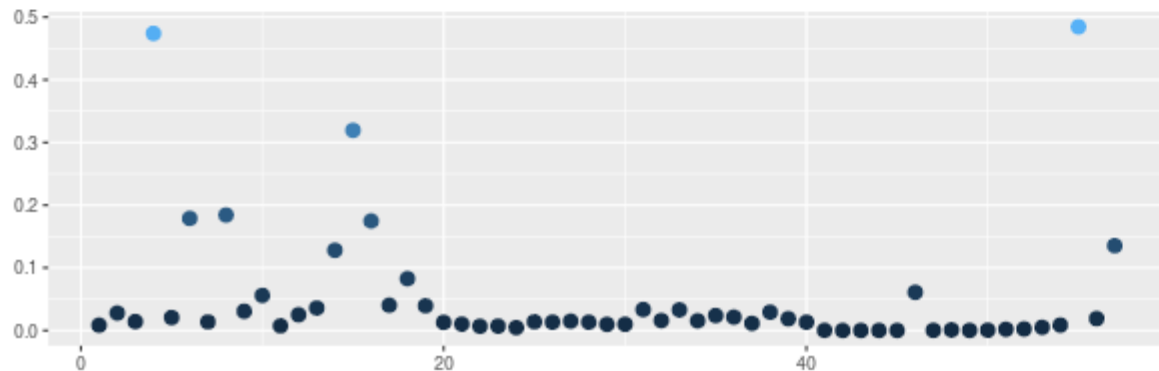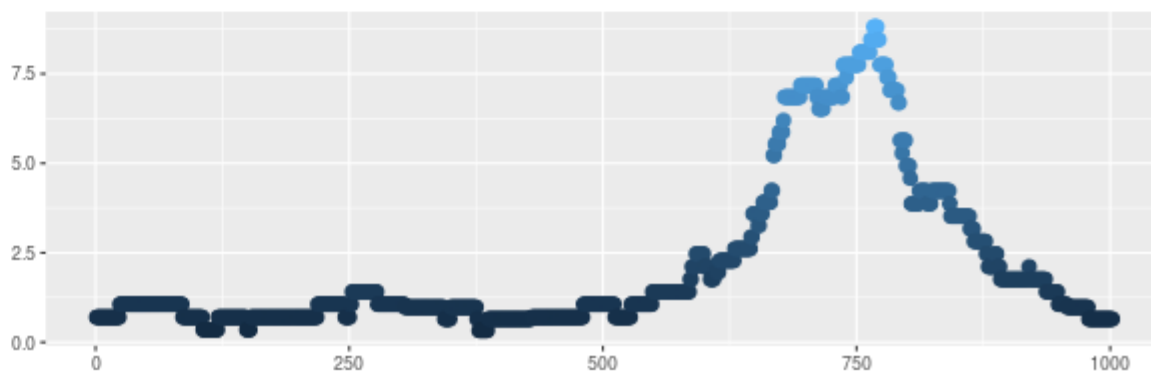

Attention weights

CHIP-seq score

# Pairwise attention module

TAF1/liver

chr1 45986848 - 45987850

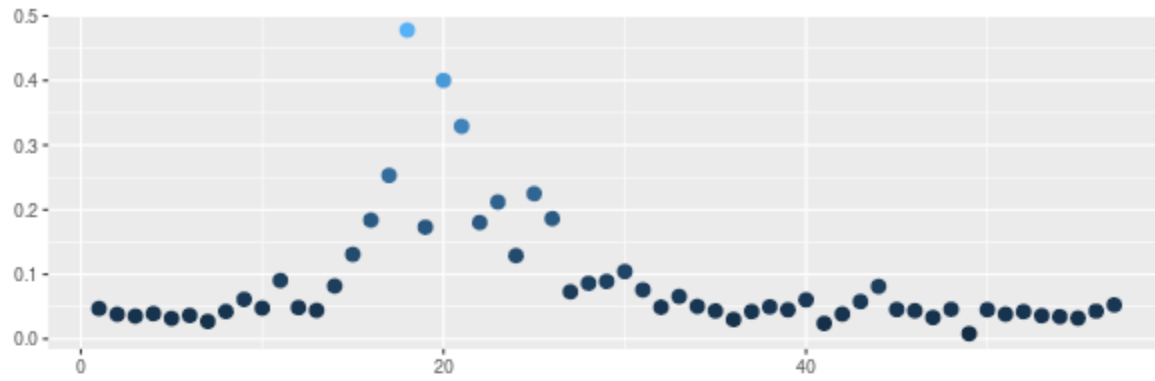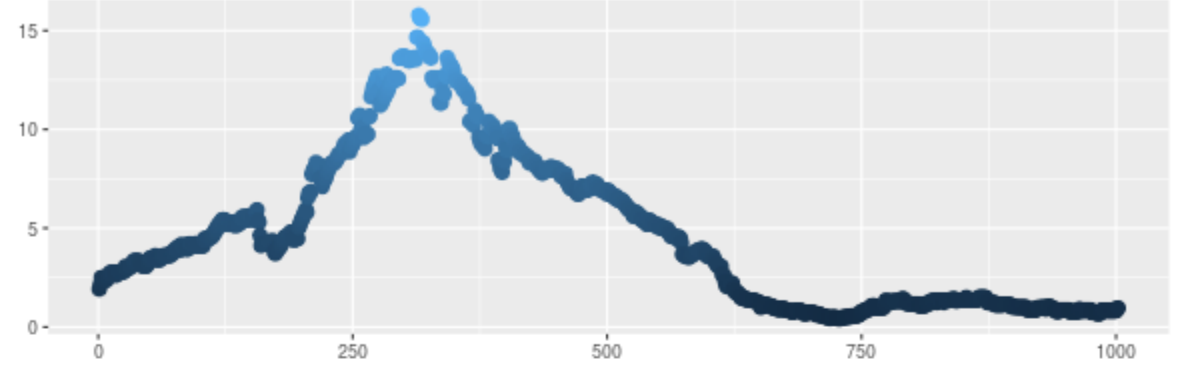

chr1 179050298 - 179051300

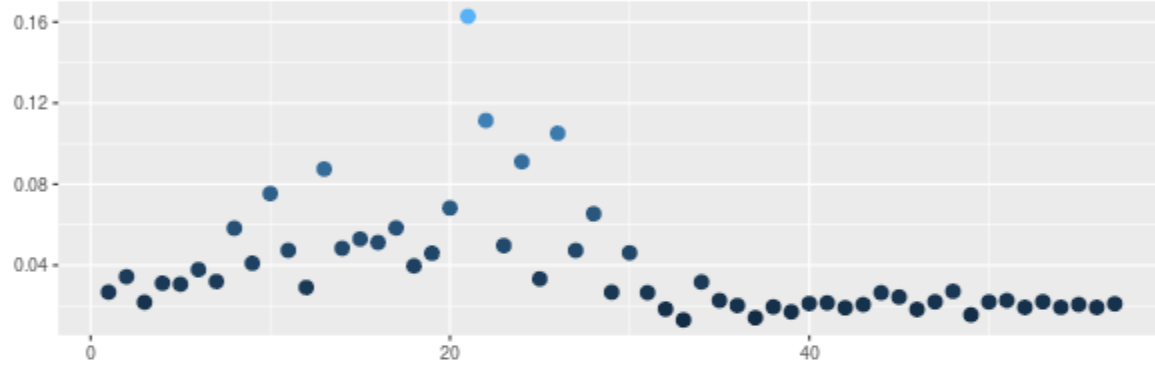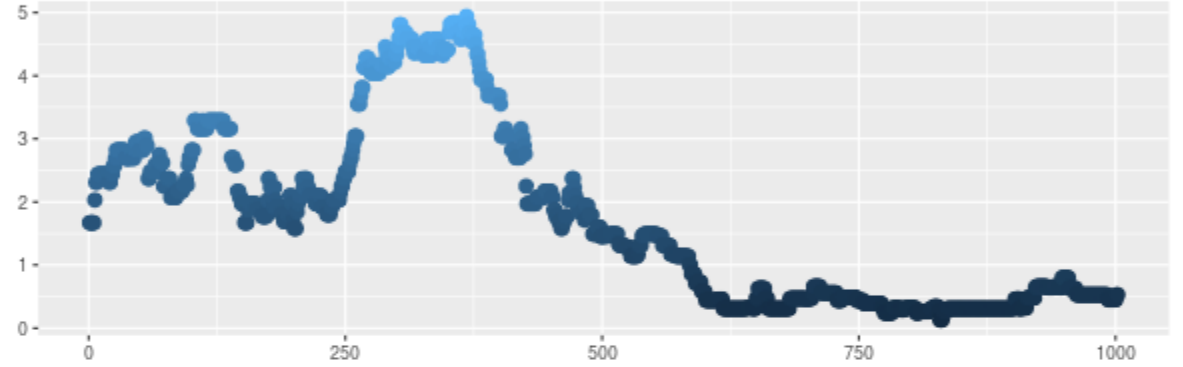

chr8 30241148 - 30242150

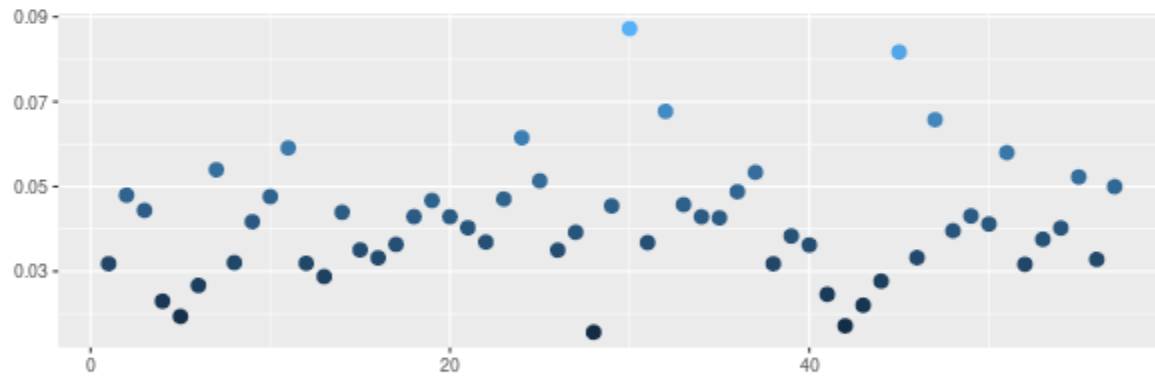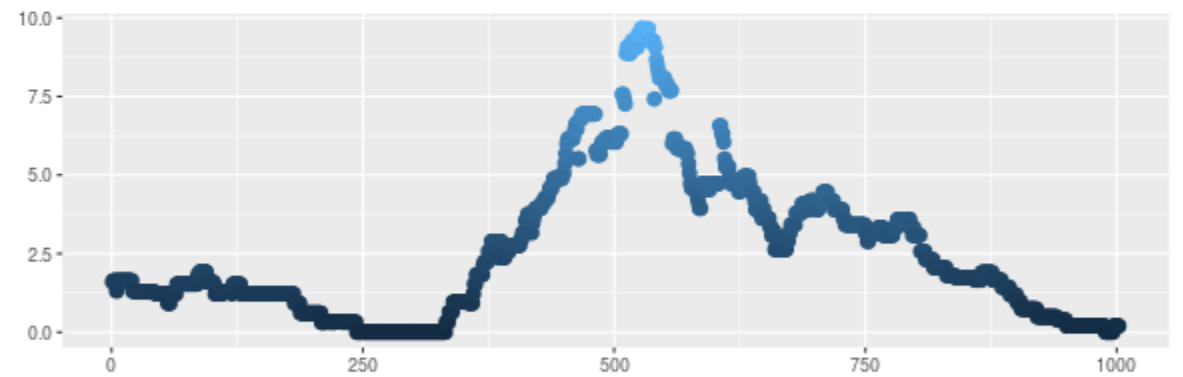

chr1 150458748 - 150459750

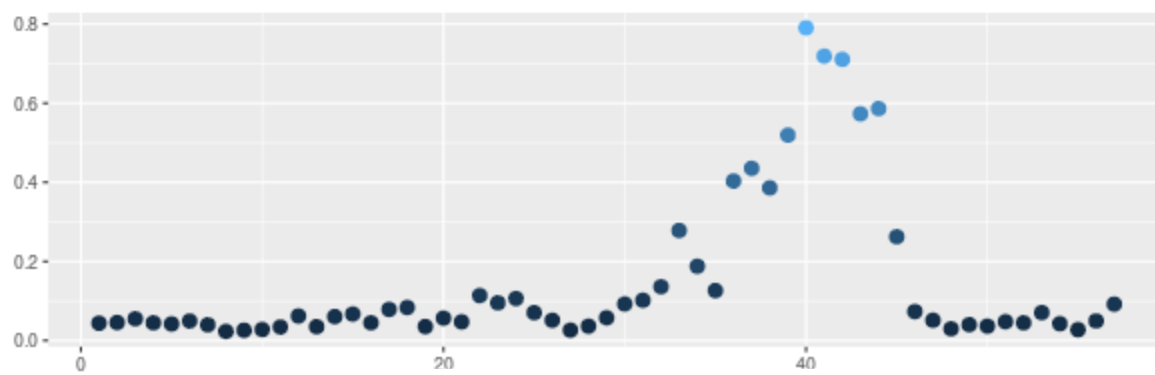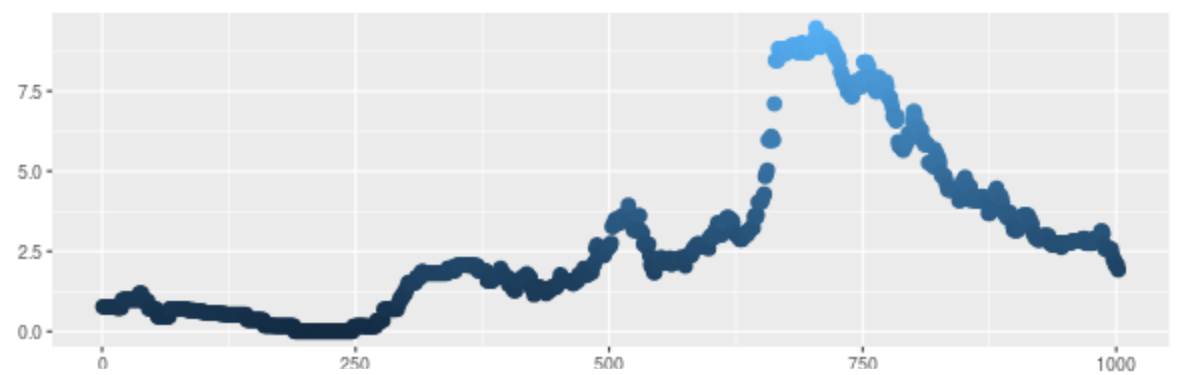

Attention weights

CHIP-seq score
